# Supplementary material for: Unsupervised machine learning reveals risk stratifying glioblastoma tumor cells
Source: eLife. 2020 Jun 23;9:e56879. doi: 10.7554/eLife.56879 (PMC7340505; doi:10.7554/eLife.56879)
Supplement: Source data 1. [file elife-56879-data1.xlsx]

## Sheet: Sheet1
Patient ID	Death	Overall Survival (Days)	EGFR Intensity	S100B Intensity
N15-765	0	622	0.0876	0.69325
N16-842	0	254	0.8726	0.9238
N15-615	1	282	0.4852	0.7961
N16-944	0	237	0.2349	0.8865
N15-306	1	364	0.6802	0.8334
N17-31	1	206	0.1441	0.8872
N16-304	0	428	0.213	0.88075
N16-467	1	267	0.21105	0.9032
N16-415	0	273	0.2351	0.8073
N16-479	1	101	0.22365	0.84545
N16-483	1	156	0.7561	0.8538
N16-482	0	67	0.1272	0.41235
N14-37	1	373	0.17285	0.796
N14-124	0	167	0.35995	0.8074
N14-8	1	12	0.17905	0.6704
N13-190	1	246	0.8488	0.8333
N16-611	0	330	0.7687	0.8538
N14-398	1	97	0.2015	0.7467
N14-437	1	103	0.2429	0.6728
N14-356	1	678	0.6929	0.6919
N16-768	0	272	0.91825	0.7271
N14-602	1	569	0.4788	0.6509
N14-855	1	405	0.3784	0.3247
N15-139	1	227	0.5777	0.4692
N14-945	1	178	0.5374	0.60215
N14-824	1	506	0.7116	0.71245
N15-286	1	393	0.55405	0.57225
N14-733	0	62	0.7593	0.6004
N14-704	1	945	0.8643	0.6103
N15-298	0	799	0.1064	0.4837
S13-20990	0	27	0.41185	0.458
S13-24485	1	565	0.2333	0.3217
N16-161	1	441	0.34515	0.8052
N16-462	0	370	0.3186	0.4983
S13-26184	1	46	0.5991	0.85225
N15-501	1	507	0.4199	0.9167
S13-33922	0	678	0.71	0.8298
N15-610	1	198	0.111	0.8976
N16-409	0	397	0.8073	0.8767
N16-268	1	255	0.0664	0.6897
N16-255	0	146	0.12475	0.89005
N16-93	1	468	0.7244	0.8853
N16-152	0	491	0.8131	0.8658
N16-306	1	133	0.1263	0.7415
N16-478	1	366	0.536	0.8842
N16-516	0	368	0.13405	0.79065
S13-29109	1	298	0.30275	0.7638
N14-461	0	993	0.8095	0.82295
N14-243	1	560	0.8398	0.8549
N14-48	1	259	0.2288	0.756
N14-250	1	271	0.60425	0.7551
N14-248	1	57	0.3107	0.7256
N16-655	1	228	1.0222	0.8303
N14-444	1	545	0.88635	0.7124
N15-241	0	827	0.3505	0.7033
N15-61	0	315	0.75795	0.6795
N14-886	1	665	0.3316	0.4252
N14-915	1	220	0.9239	0.6583
N15-33	1	577	1.0322	0.6891
N14-716	1	400	0.6068	0.69755
N14-682	1	578	0.9463	0.5312
N14-754	0	979	0.9795	0.5659
S13-18288	1	994	0.2997	0.3511
N17-84	0	178	0.0957	0.7632
N15-515	1	81	0.3185	0.8137
N16-20	1	69	0.1722	0.69325
N16-412	0	391	0.6082	0.8805
S13-26617	1	460	0.7635	0.9211
N13-1	1	103	0.7945	0.8821
N15-557	1	456	0.2908	0.9431
N15-384	0	752	0.1411	0.80095
N15-380	1	344	0.1885	0.8526
N15-341	0	783	0.7493	0.8897
		Q1	0.22365	0.6728
		Q2	0.4199	0.7638
		Q3	0.75795	0.8538
		IQR	0.5343	0.181
