# Supplementary material for: Unsupervised machine learning reveals risk stratifying glioblastoma tumor cells
Source: eLife journal article supplement (doi:10.7554/elife.56879), 2020-06-22
Supplement: supp [file elife-56879-supp-v1.zip]

Figure 1-figure supplement 2

HR > 1

33:  
P: ▲ S100B<sup>+4</sup> SOX2<sup>+2</sup>  
▼ GFAP<sup>-3</sup> CD44<sup>-3</sup> EGFR<sup>-2</sup>  
S: ▲ -  
▼ p-STAT1<sup>-2</sup> p-S6<sup>-2</sup>

37:  
P: ▲ SOX2<sup>+4</sup> S100B<sup>+3</sup>  
▼ CD44<sup>-4</sup> GFAP<sup>-3</sup> EGFR<sup>-2</sup>  
S: ▲ p-S6<sup>+2</sup>  
▼ p-STAT1<sup>-2</sup> p-NFκB<sup>-2</sup>

42:  
P: ▲ S100B<sup>+7</sup> SOX2<sup>+6</sup>  
▼ GFAP<sup>-4</sup> CD44<sup>-3</sup> EGFR<sup>-2</sup>  
S: ▲ p-STAT3<sup>+3</sup> p-STAT5<sup>+2</sup> p-S6<sup>+2</sup>  
cyclin B1<sup>+2</sup>  
▼ p-NFκB<sup>-2</sup>

34:  
P: ▲ S100B<sup>+5</sup> SOX2<sup>+5</sup>  
▼ GFAP<sup>-4</sup> CD44<sup>-3</sup> EGFR<sup>-2</sup>  
S: ▲ p-STAT3<sup>+5</sup> p-STAT5<sup>+4</sup> p-S6<sup>+4</sup>  
cyclin B1<sup>+4</sup> p-AKT<sup>+2</sup> p-STAT1<sup>+2</sup>  
▼ -

29:  
P: ▲ S100B<sup>+5</sup> SOX2<sup>+2</sup>  
▼ GFAP<sup>-4</sup> CD44<sup>-3</sup> NCAM<sup>-2</sup> EGFR<sup>-2</sup>  
S: ▲ p-STAT3<sup>+5</sup> p-S6<sup>+4</sup> p-STAT5<sup>+3</sup>  
CyclinB1<sup>+3</sup>  
▼ -

26:  
P: ▲ S100B<sup>+4</sup>  
▼ SOX2<sup>-5</sup> GFAP<sup>-3</sup> NCAM<sup>-2</sup>  
EGFR<sup>-2</sup> CD44<sup>-2</sup>  
S: ▲ p-S6<sup>+4</sup> p-STAT3<sup>+3</sup> CyclinB1<sup>+2</sup>  
▼ p-STAT1<sup>-2</sup> p-NFκB<sup>-2</sup>

20:  
P: ▲ S100B<sup>+7</sup> TUJ1<sup>+2</sup>  
▼ CD44<sup>-3</sup> EGFR<sup>-2</sup>  
S: ▲ p-S6<sup>+3</sup> CyclinB1<sup>+3</sup> p-STAT3<sup>+2</sup>  
▼ -

28:  
P: ▲ S100B<sup>+6</sup> SOX2<sup>+2</sup>  
▼ CD44<sup>-4</sup> GFAP<sup>-3</sup> EGFR<sup>-2</sup>  
S: ▲ p-STAT3<sup>+7</sup> p-S6<sup>+7</sup> p-STAT5<sup>+6</sup>  
CyclinB1<sup>+6</sup> p-AKT<sup>+4</sup> p-STAT1<sup>+3</sup>  
p-NFκB<sup>+3</sup>  
▼ -

11:  
P: ▲ CD49F<sup>+5</sup>  
▼ S100B<sup>-9</sup> TUJ1<sup>-2</sup> SOX2<sup>-2</sup>  
S: ▲ -  
▼ p-S6<sup>-5</sup> p-STAT3<sup>-4</sup> CyclinB1<sup>-4</sup>  
p-STAT5<sup>-3</sup> p-AKT<sup>-2</sup> p-NFκB<sup>-2</sup>

27:  
P: ▲ S100B<sup>+5</sup>  
▼ CD44<sup>-4</sup> EGFR<sup>-2</sup> GFAP<sup>-2</sup>  
S: ▲ p-STAT3<sup>+5</sup> p-S6<sup>+5</sup> p-STAT5<sup>+4</sup>  
CyclinB1<sup>+4</sup> p-AKT<sup>+2</sup>  
▼ -

22:  
P: ▲ CD44<sup>+5</sup>  
▼ S100B<sup>-10</sup> NCAM<sup>-3</sup> TUJ1<sup>-2</sup>  
SOX2<sup>-2</sup> EGFR<sup>-2</sup>  
S: ▲ -  
▼ p-S6<sup>-6</sup> CyclinB1<sup>-5</sup> p-STAT3<sup>-4</sup>  
p-STAT5<sup>-3</sup> p-AKT<sup>-2</sup>

17:  
P: ▲ NCAM<sup>+3</sup>  
▼ S100B<sup>-4</sup> GFAP<sup>-2</sup>  
S: ▲ -  
▼ p-STAT5<sup>-3</sup> p-STAT1<sup>-3</sup> p-STAT3<sup>-3</sup>  
p-NFκB<sup>-3</sup> p-AKT<sup>-2</sup> p-S6<sup>-2</sup>

19:  
P: ▲ S100B<sup>+5</sup> GFAP<sup>+2</sup>  
▼ -  
S: ▲ p-STAT3<sup>+2</sup> p-S6<sup>+2</sup> CyclinB1<sup>+2</sup>  
▼ p-STAT5<sup>-2</sup> p-STAT1<sup>-2</sup>

21:  
P: ▲ S100B<sup>+6</sup> GFAP<sup>+2</sup>  
▼ SOX2<sup>-4</sup> EGFR<sup>-2</sup>  
S: ▲ p-S6<sup>+6</sup> p-STAT3<sup>+4</sup> CyclinB1<sup>+4</sup>  
p-STAT5<sup>+2</sup>  
▼ -

1:  
P: ▲ GFAP<sup>+4</sup> NCAM<sup>+3</sup> TUJ1<sup>+2</sup>  
SOX2<sup>+2</sup> EGFR<sup>+2</sup> Nestin<sup>+2</sup>  
CD44<sup>+2</sup>  
▼ S100B<sup>-10</sup>  
S: ▲ p-S6<sup>+3</sup> p-STAT3<sup>+2</sup> CyclinB1<sup>+2</sup>  
▼ p-STAT5<sup>-2</sup>

43:  
P: ▲ -  
▼ CD133<sup>-2</sup> SOX2<sup>-2</sup> EGFR<sup>-2</sup> CD44<sup>-2</sup>  
S: ▲ p-STAT5<sup>+9</sup> p-NFκB<sup>+2</sup>  
▼ p-STAT1<sup>-3</sup> p-STAT3<sup>-3</sup> p-AKT<sup>-2</sup>  
p-S6<sup>-2</sup>

31:  
P: ▲ SOX2<sup>+2</sup>  
▼ S100B<sup>-10</sup> NCAM<sup>-3</sup> TUJ1<sup>-2</sup>  
EGFR<sup>-2</sup> GFAP<sup>-2</sup>  
S: ▲ -  
▼ p-S6<sup>-6</sup> CyclinB1<sup>-4</sup> p-STAT5<sup>-3</sup>  
p-STAT3<sup>-3</sup> p-AKT<sup>-2</sup>

24:  
P: ▲ -  
▼ S100B<sup>-5</sup> TUJ1<sup>-2</sup> NCAM<sup>-2</sup>  
EGFR<sup>-2</sup>  
S: ▲ -  
▼ -

16:  
P: ▲ SOX2<sup>+3</sup> CD44<sup>+3</sup>  
▼ S100B<sup>-9</sup> TUJ1<sup>-2</sup> EGFR<sup>-2</sup>  
S: ▲ -  
▼ p-S6<sup>-4</sup> p-STAT5<sup>-2</sup>

9:  
P: ▲ S100B<sup>+6</sup> SOX2<sup>+2</sup> GFAP<sup>+2</sup>  
▼ EGFR<sup>-2</sup>  
S: ▲ p-STAT3<sup>+4</sup> p-S6<sup>+4</sup> CyclinB1<sup>+3</sup>  
p-STAT5<sup>+2</sup> p-STAT1<sup>+2</sup> p-NFκB<sup>+2</sup>  
p-ERK<sup>+2</sup>  
▼ -

35:  
P: ▲ -  
▼ S100B<sup>-10</sup> SOX2<sup>-4</sup> NCAM<sup>-3</sup> CD44<sup>-2</sup>  
TUJ1<sup>-2</sup> CD133<sup>-2</sup> EGFR<sup>-2</sup>  
S: ▲ -  
▼ CyclinB1<sup>-7</sup> p-S6<sup>-6</sup> p-STAT3<sup>-4</sup>  
p-STAT5<sup>-3</sup> p-AKT<sup>-2</sup>

6:  
P: ▲ S100B<sup>+6</sup> EGFR<sup>+2</sup> CD44<sup>+2</sup>  
GFAP<sup>+2</sup>  
▼ SOX2<sup>-2</sup>  
S: ▲ p-S6<sup>+3</sup> CyclinB1<sup>+3</sup> p-STAT5<sup>+2</sup>  
p-STAT1<sup>+2</sup> p-STAT3<sup>+2</sup> p-NFκB<sup>+2</sup>  
▼ -

30:  
P: ▲ CD44<sup>+2</sup> GFAP<sup>+2</sup>  
▼ S100B<sup>-10</sup> NCAM<sup>-3</sup> TUJ1<sup>-2</sup>  
SOX2<sup>-2</sup> EGFR<sup>-2</sup>  
S: ▲ -  
▼ CyclinB1<sup>-7</sup> p-S6<sup>-6</sup> p-STAT5<sup>-3</sup>  
p-STAT3<sup>-3</sup> p-AKT<sup>-2</sup>

14:  
P: ▲ S100B<sup>+5</sup> GFAP<sup>+3</sup> SOX2<sup>+2</sup>  
▼ EGFR<sup>-2</sup> CD44<sup>-2</sup>  
S: ▲ p-STAT3<sup>+3</sup> p-S6<sup>+3</sup>  
▼ -

32:  
P: ▲ -  
▼ S100B<sup>-6</sup> GFAP<sup>-4</sup> SOX2<sup>-3</sup> CD44<sup>-3</sup>  
NCAM<sup>-2</sup> CD133<sup>-2</sup> EGFR<sup>-2</sup>  
S: ▲ -  
▼ p-S6<sup>-4</sup> p-STAT5<sup>-3</sup> CyclinB1<sup>-3</sup>  
p-STAT3<sup>-3</sup> p-NFκB<sup>-3</sup> p-STAT1<sup>-3</sup>  
p-AKT<sup>-2</sup>

12:  
P: ▲ NCAM<sup>+3</sup> EGFR<sup>+2</sup> CD44<sup>+2</sup>  
▼ S100B<sup>-7</sup>  
S: ▲ -  
▼ p-S6<sup>-5</sup> p-STAT5<sup>-3</sup> p-STAT3<sup>-3</sup>  
CyclinB1<sup>-3</sup> p-STAT1<sup>-2</sup> p-NFκB<sup>-2</sup>

23:  
P: ▲ GFAP<sup>+3</sup>  
▼ S100B<sup>-10</sup> NCAM<sup>-3</sup> TUJ1<sup>-2</sup>  
EGFR<sup>-2</sup>  
S: ▲ -  
▼ p-S6<sup>-6</sup> p-STAT3<sup>-4</sup> CyclinB1<sup>-4</sup>  
p-STAT5<sup>-3</sup> p-AKT<sup>-2</sup>

36:  
P: ▲ -  
▼ S100B<sup>-5</sup> GFAP<sup>-5</sup> NCAM<sup>-3</sup> CD44<sup>-3</sup>  
TUJ1<sup>-2</sup> SOX2<sup>-2</sup> EGFR<sup>-2</sup>  
S: ▲ -  
▼ p-STAT3<sup>-6</sup> p-S6<sup>-6</sup> CyclinB1<sup>-6</sup>  
p-NFκB<sup>-4</sup> p-STAT5<sup>-3</sup> p-STAT1<sup>-3</sup>  
p-AKT<sup>-2</sup>

10:  
P: ▲ CD44<sup>+5</sup> CD49F<sup>+3</sup> EGFR<sup>+3</sup>  
▼ S100B<sup>-9</sup>  
S: ▲ -  
▼ p-STAT5<sup>-2</sup> p-S6<sup>-2</sup>

40:  
P: ▲ -  
▼ EGFR<sup>-2</sup> CD44<sup>-2</sup>  
S: ▲ p-STAT1<sup>+8</sup>  
▼ p-STAT3<sup>-3</sup> p-STAT5<sup>-2</sup>

38:  
P: ▲ CD15<sup>+5</sup>  
▼ S100B<sup>-10</sup> NCAM<sup>-3</sup> TUJ1<sup>-2</sup> SOX2<sup>-2</sup>  
S: ▲ -  
▼ CyclinB1<sup>-7</sup> p-S6<sup>-6</sup> p-STAT5<sup>-3</sup>  
p-STAT3<sup>-3</sup> p-AKT<sup>-2</sup> p-NFκB<sup>-2</sup>

39:  
P: ▲ -  
▼ S100B<sup>-10</sup> SOX2<sup>-5</sup> GFAP<sup>-5</sup>  
NCAM<sup>-3</sup> CD44<sup>-3</sup> TUJ1<sup>-2</sup> EGFR<sup>-2</sup>  
S: ▲ -  
▼ CyclinB1<sup>-7</sup> p-STAT3<sup>-6</sup> p-S6<sup>-6</sup>  
p-NFκB<sup>-4</sup> p-STAT5<sup>-3</sup> p-STAT1<sup>-3</sup>  
p-AKT<sup>-2</sup>

15:  
P: ▲ CD44<sup>+5</sup> EGFR<sup>+2</sup> GFAP<sup>+2</sup>  
▼ S100B<sup>-9</sup> TUJ1<sup>-2</sup>  
S: ▲ -  
▼ p-S6<sup>-6</sup> CyclinB1<sup>-4</sup> p-STAT5<sup>-3</sup>  
p-STAT3<sup>-3</sup> p-AKT<sup>-2</sup>

7:  
P: ▲ S100B<sup>+3</sup> NCAM<sup>+3</sup> CD133<sup>+3</sup>  
▼ SOX2<sup>-3</sup> EGFR<sup>-2</sup>  
S: ▲ p-STAT3<sup>+3</sup> p-S6<sup>+3</sup> p-STAT5<sup>+2</sup>  
CyclinB1<sup>+2</sup>  
▼ -

18:  
P: ▲ S100B<sup>+4</sup> EGFR<sup>+2</sup> GFAP<sup>+2</sup>  
▼ -  
S: ▲ -  
▼ p-STAT5<sup>-3</sup> p-STAT3<sup>-3</sup> p-S6<sup>-3</sup>  
p-AKT<sup>-2</sup> p-STAT1<sup>-2</sup> p-NFκB<sup>-2</sup>

8:  
P: ▲ S100B<sup>+5</sup> EGFR<sup>+3</sup> GFAP<sup>+3</sup>  
▼ -  
S: ▲ p-S6<sup>+2</sup>  
▼ p-STAT5<sup>-2</sup> p-STAT3<sup>-2</sup>

25:  
P: ▲ S100B<sup>+4</sup>  
▼ SOX2<sup>-4</sup> TUJ1<sup>-2</sup> NCAM<sup>-2</sup> CD44<sup>-2</sup>  
S: ▲ -  
▼ p-STAT3<sup>-4</sup> p-S6<sup>-4</sup> p-STAT5<sup>-3</sup>  
p-STAT1<sup>-3</sup> p-NFκB<sup>-3</sup> p-AKT<sup>-2</sup>  
CyclinB1<sup>-2</sup>

13:  
P: ▲ NCAM<sup>+3</sup> EGFR<sup>+2</sup>  
▼ S100B<sup>-2</sup>  
S: ▲ -  
▼ p-STAT5<sup>-3</sup> p-STAT1<sup>-2</sup> p-NFκB<sup>-2</sup>  
p-S6<sup>-2</sup>

41:  
P: ▲ -  
▼ CD44<sup>-3</sup> S100B<sup>-2</sup> NCAM<sup>-2</sup>  
SOX2<sup>-2</sup> EGFR<sup>-2</sup> GFAP<sup>-2</sup>  
S: ▲ p-AKT<sup>+10</sup>  
▼ p-STAT3<sup>-5</sup> p-S6<sup>-4</sup> p-NFκB<sup>-2</sup>  
cyclin B1<sup>-2</sup>

4:  
P: ▲ EGFR<sup>+6</sup> NCAM<sup>+2</sup>  
▼ S100B<sup>-6</sup>  
S: ▲ -  
▼ p-S6<sup>-6</sup> p-STAT3<sup>-5</sup> cyclin B1<sup>-4</sup>  
p-STAT5<sup>-3</sup> p-STAT1<sup>-3</sup> p-AKT<sup>-2</sup>

5:  
P: ▲ S100B<sup>+4</sup> EGFR<sup>+4</sup> NCAM<sup>+3</sup>  
CD44<sup>+2</sup>  
▼ -  
S: ▲ p-S6<sup>+2</sup>  
▼ p-STAT3<sup>-2</sup> p-STAT5<sup>-2</sup>

2:  
P: ▲ EGFR<sup>+5</sup>  
▼ S100B<sup>-8</sup>  
S: ▲ -  
▼ p-S6<sup>-5</sup> p-STAT5<sup>-3</sup>

3:  
P: ▲ EGFR<sup>+2</sup> SOX2<sup>+2</sup>  
▼ S100B<sup>-10</sup> NCAM<sup>-3</sup> TUJ1<sup>-2</sup>  
CD133<sup>-2</sup>  
S: ▲ p-NFκB<sup>+2</sup>  
▼ p-S6<sup>-6</sup> cyclin B1<sup>-6</sup> p-STAT3<sup>-2</sup>  
p-STAT5<sup>-2</sup>

HR < 1
