# Supplementary material for: Unsupervised machine learning reveals risk stratifying glioblastoma tumor cells
Source: eLife journal article supplement (doi:10.7554/elife.56879), 2020-06-22
Supplement: supp [file elife-56879-supp-v1.zip]

# Supplementary File 6

Each page is specific for one of the 28 patients included in the main body of the text. Across the top of each page there are four t-SNE plots. From left to right: contour of all 28 patients, density contour of one patient, flowSOM cluster coloring of one patient, flowSOM cluster coloring of all 28 patients. Overall survival (OS) and progression-free survival (PFS) are noted on the left. Main body of the page is dedicated to t-SNE heat plots depicting marker expression on a single patient sample. On the right, flowSOM clusters are listed and percent of patient cells falling into each cluster is noted.

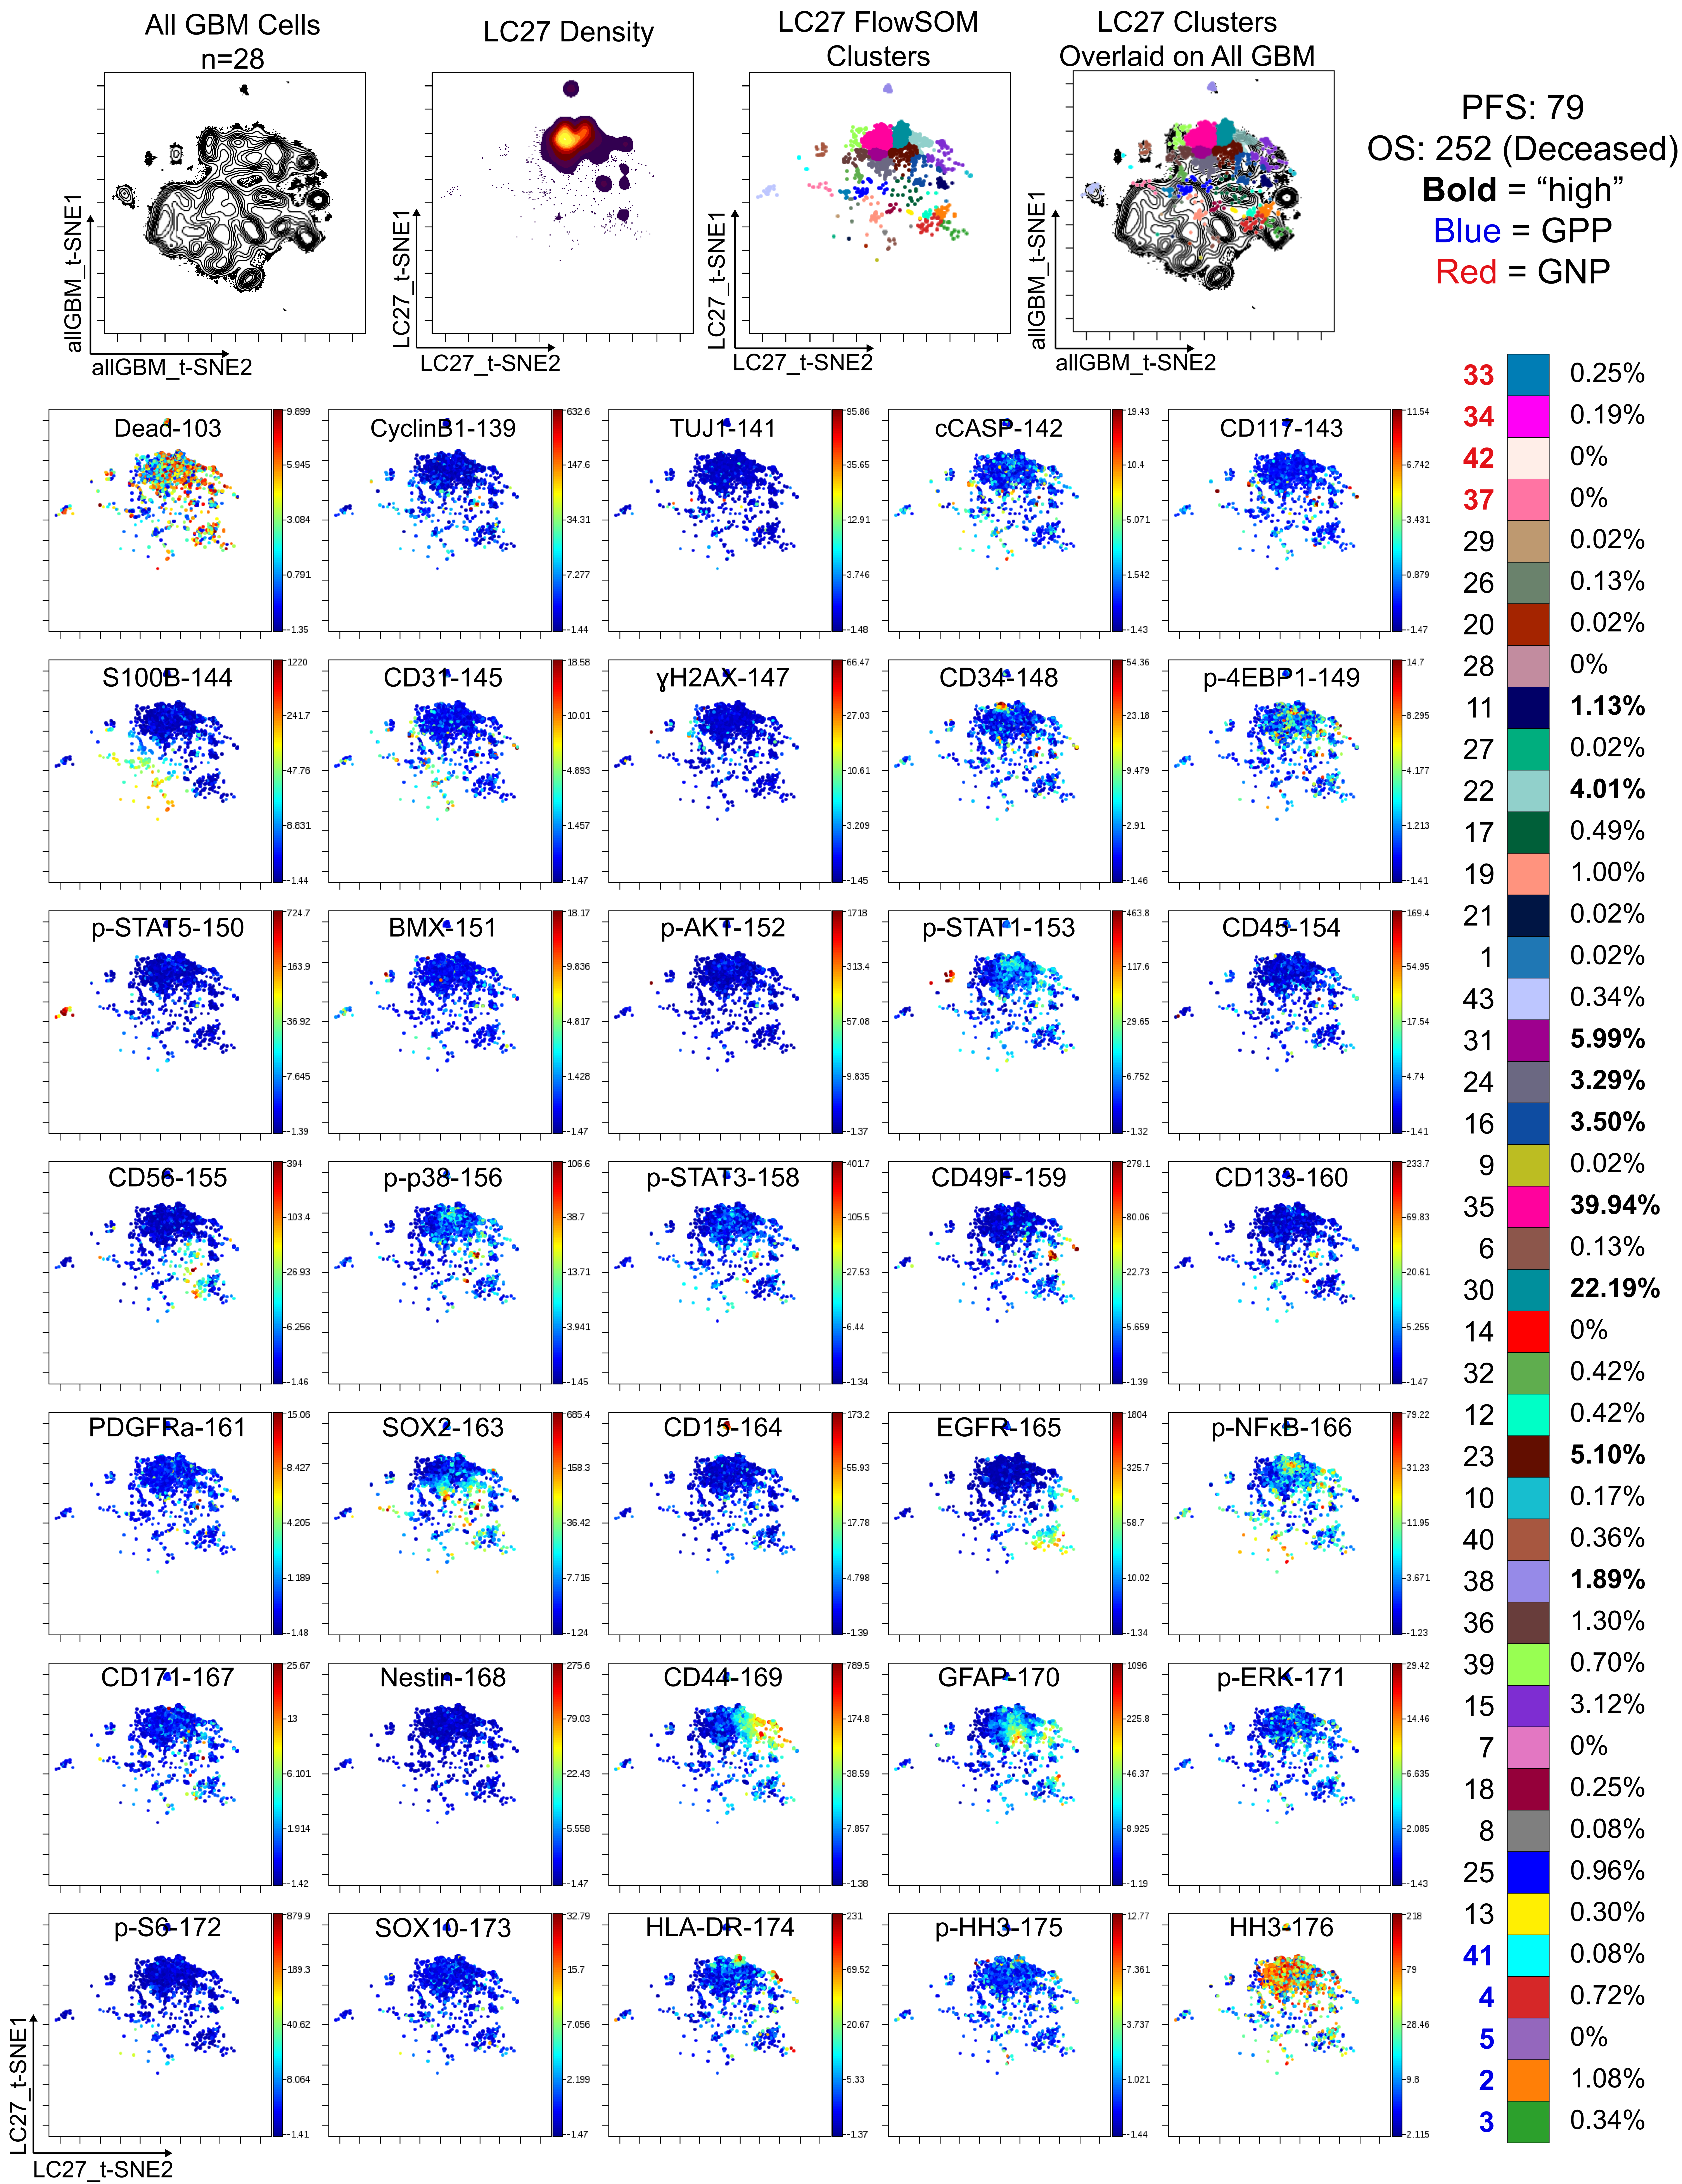



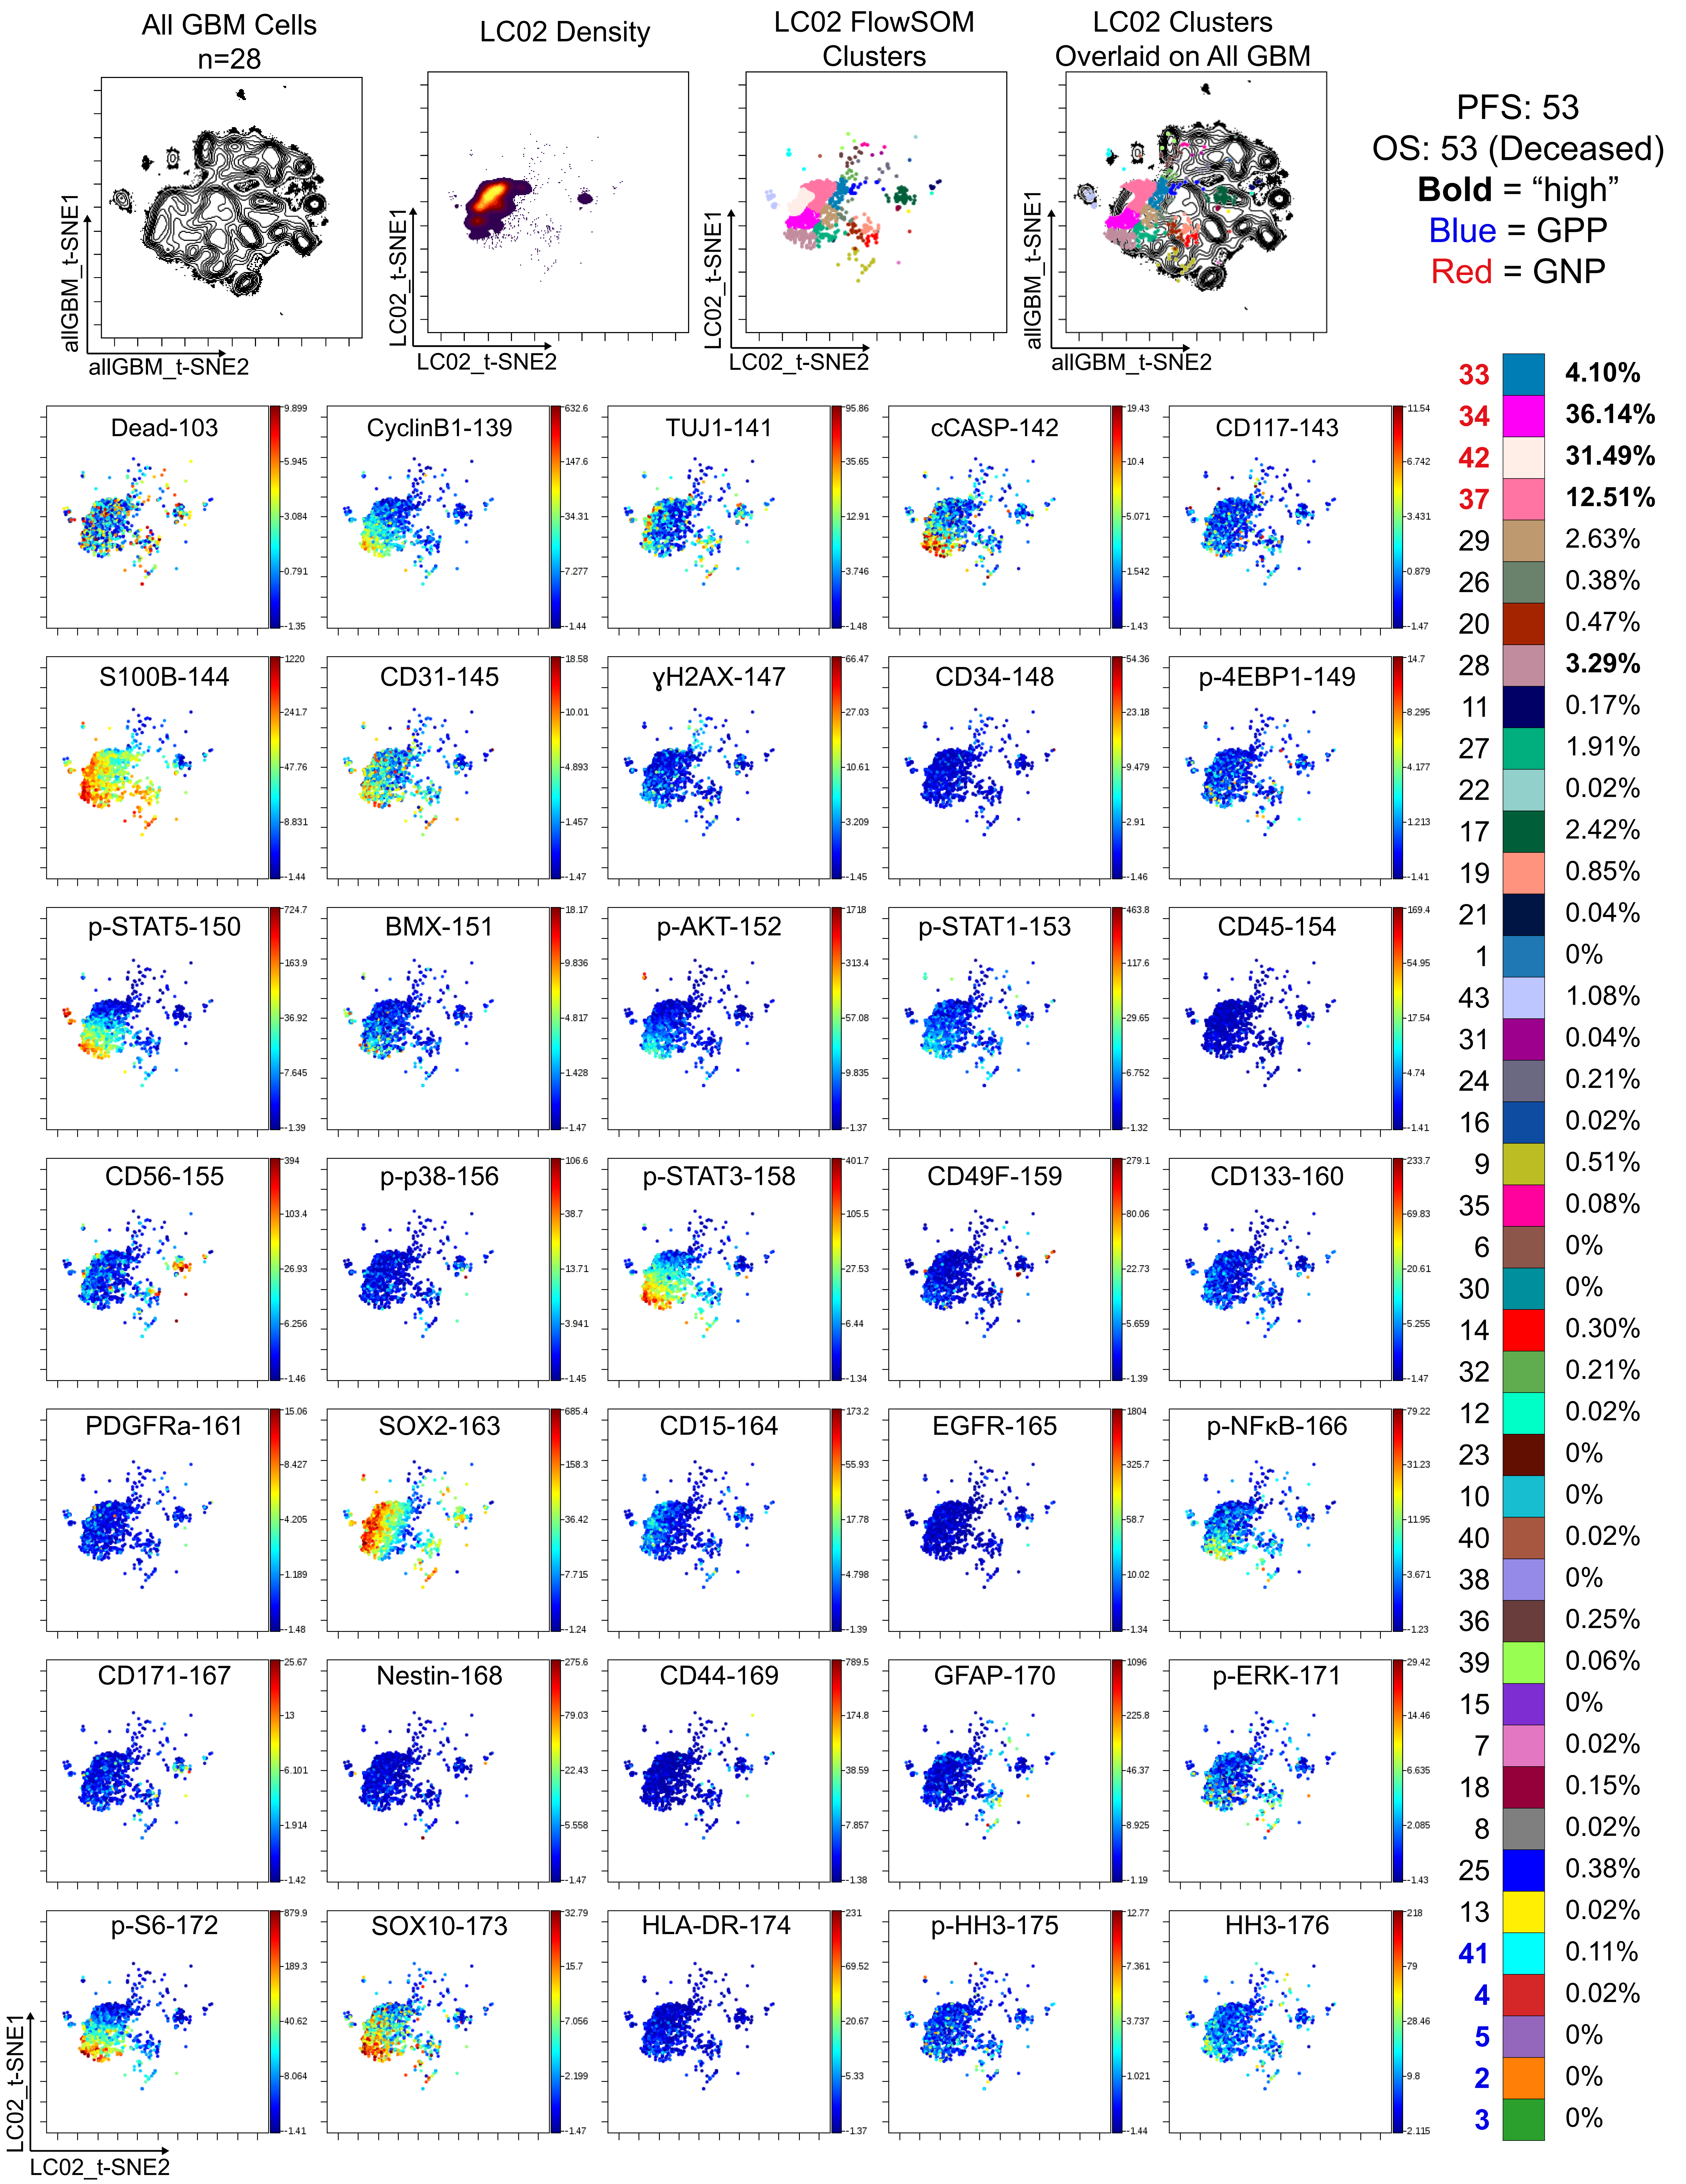



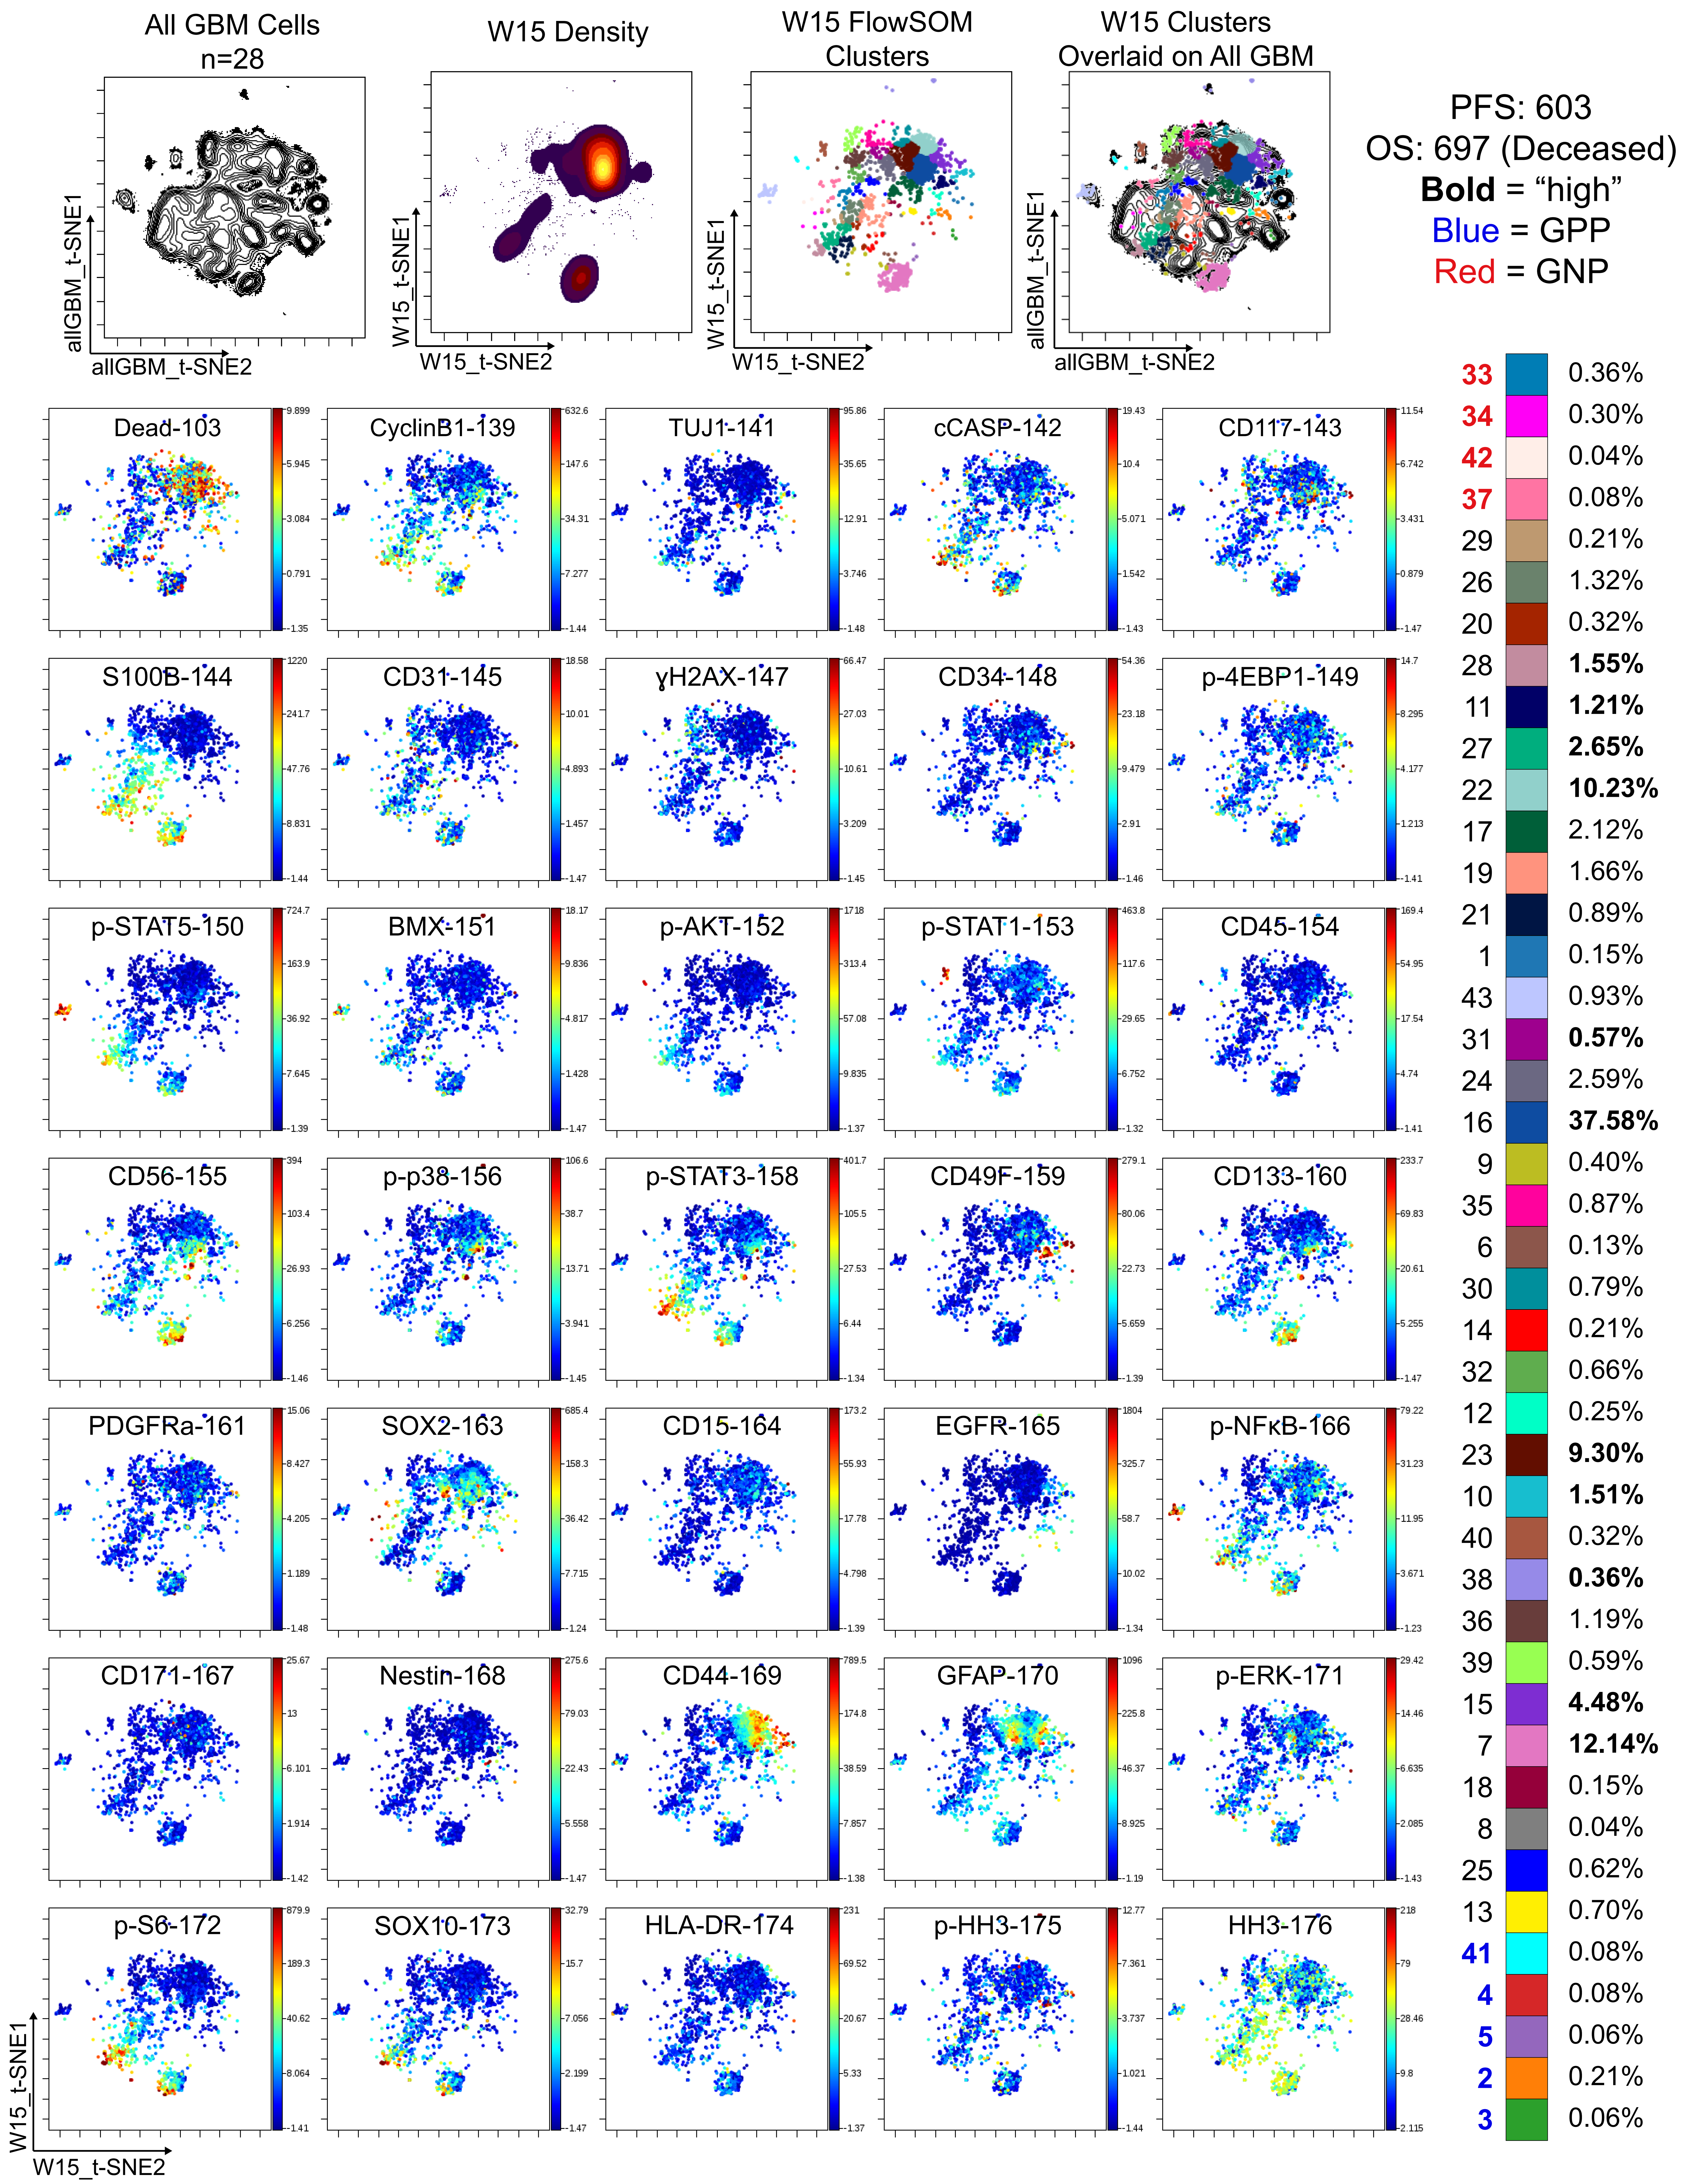



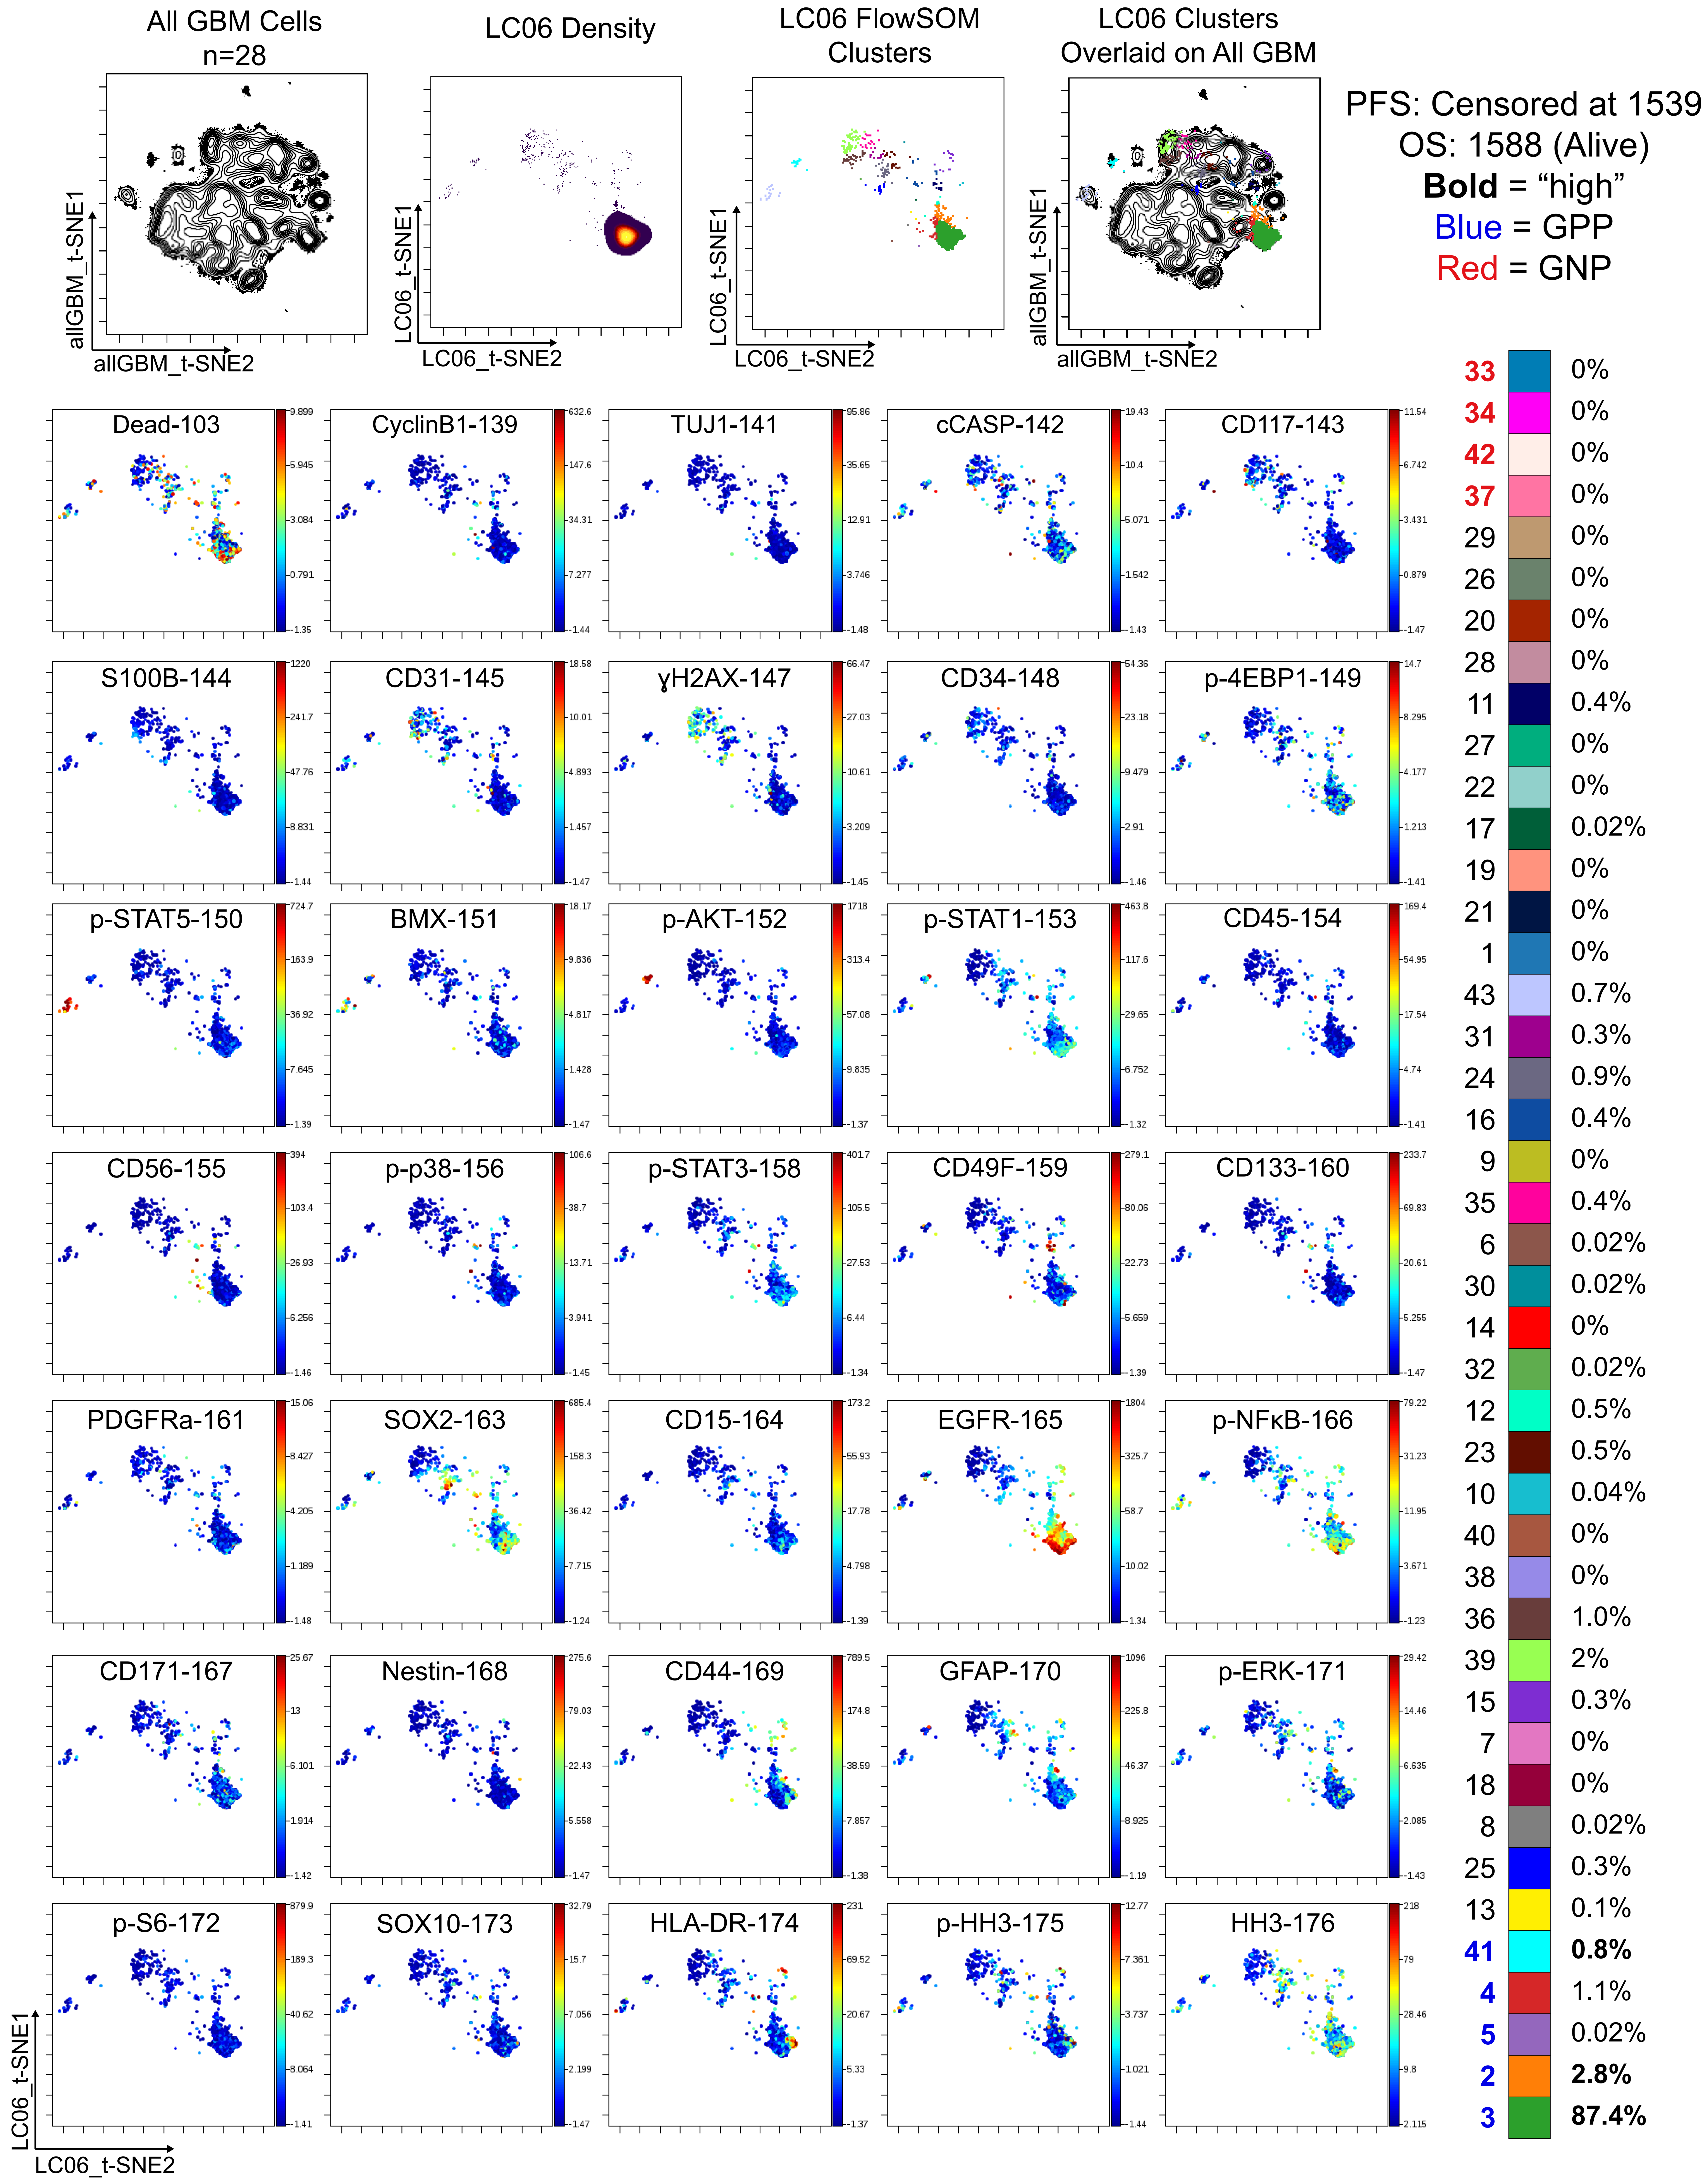



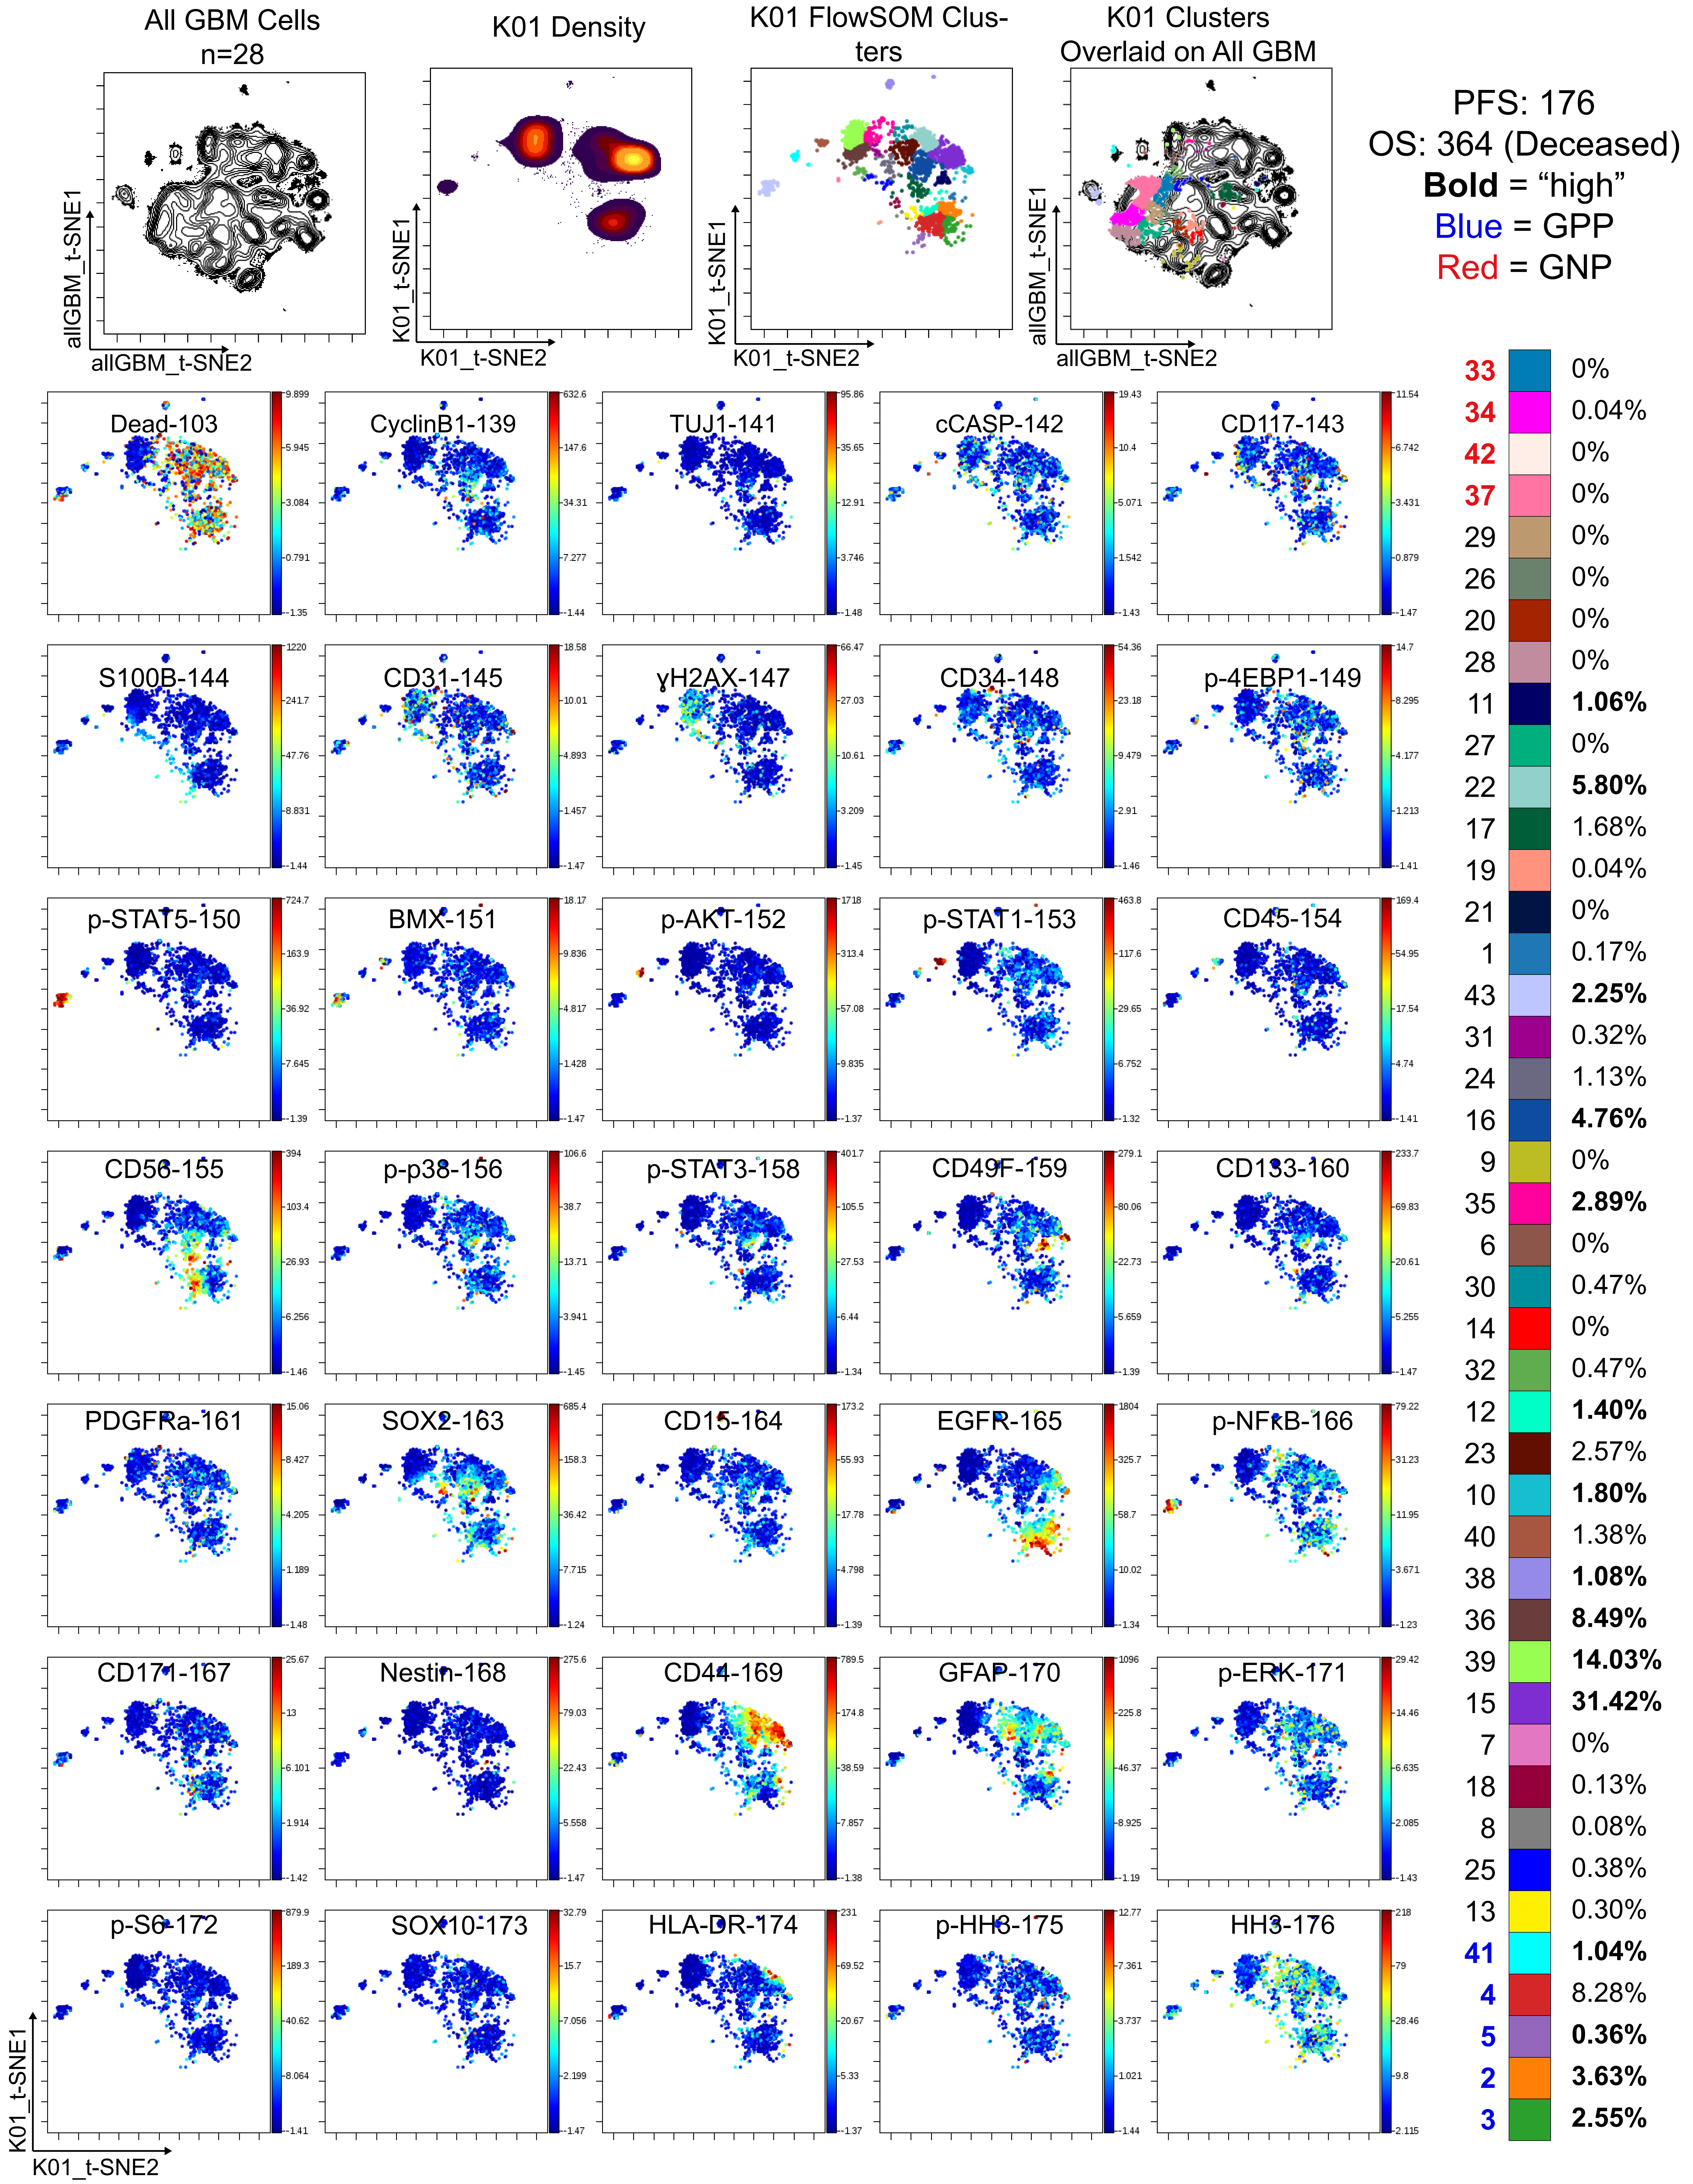

K01\_t-SNE1

K01\_t-SNE2



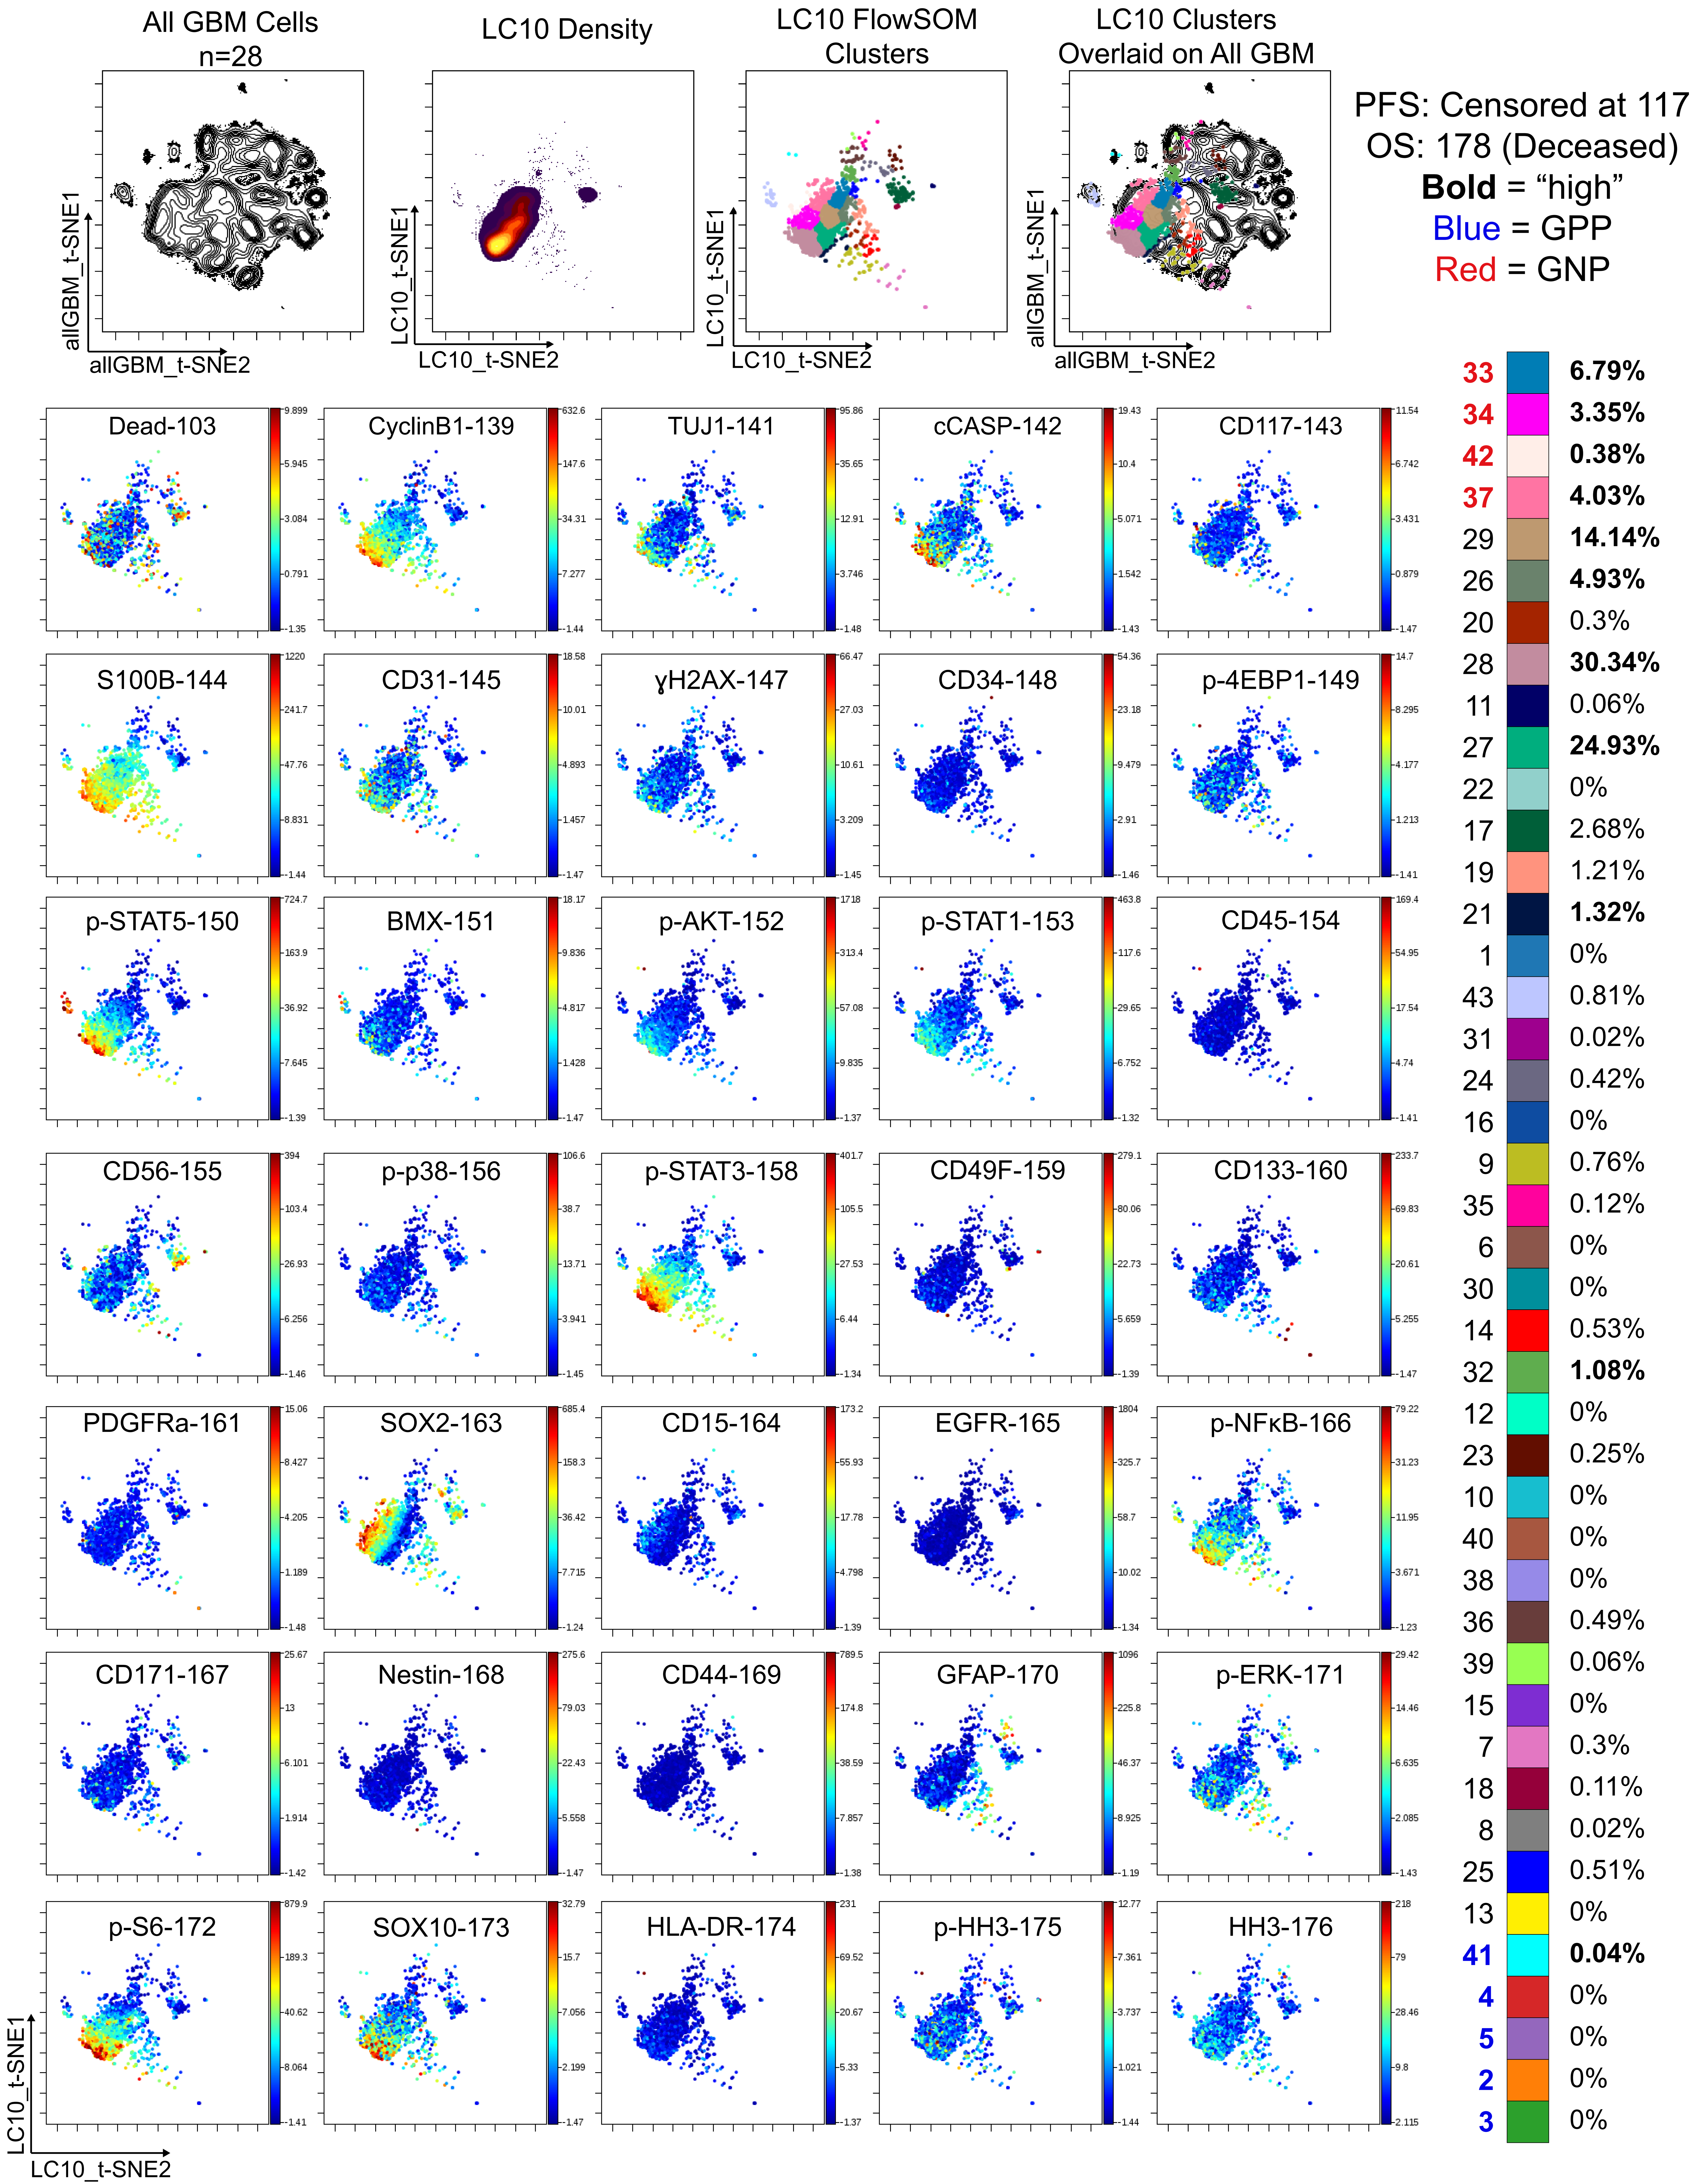



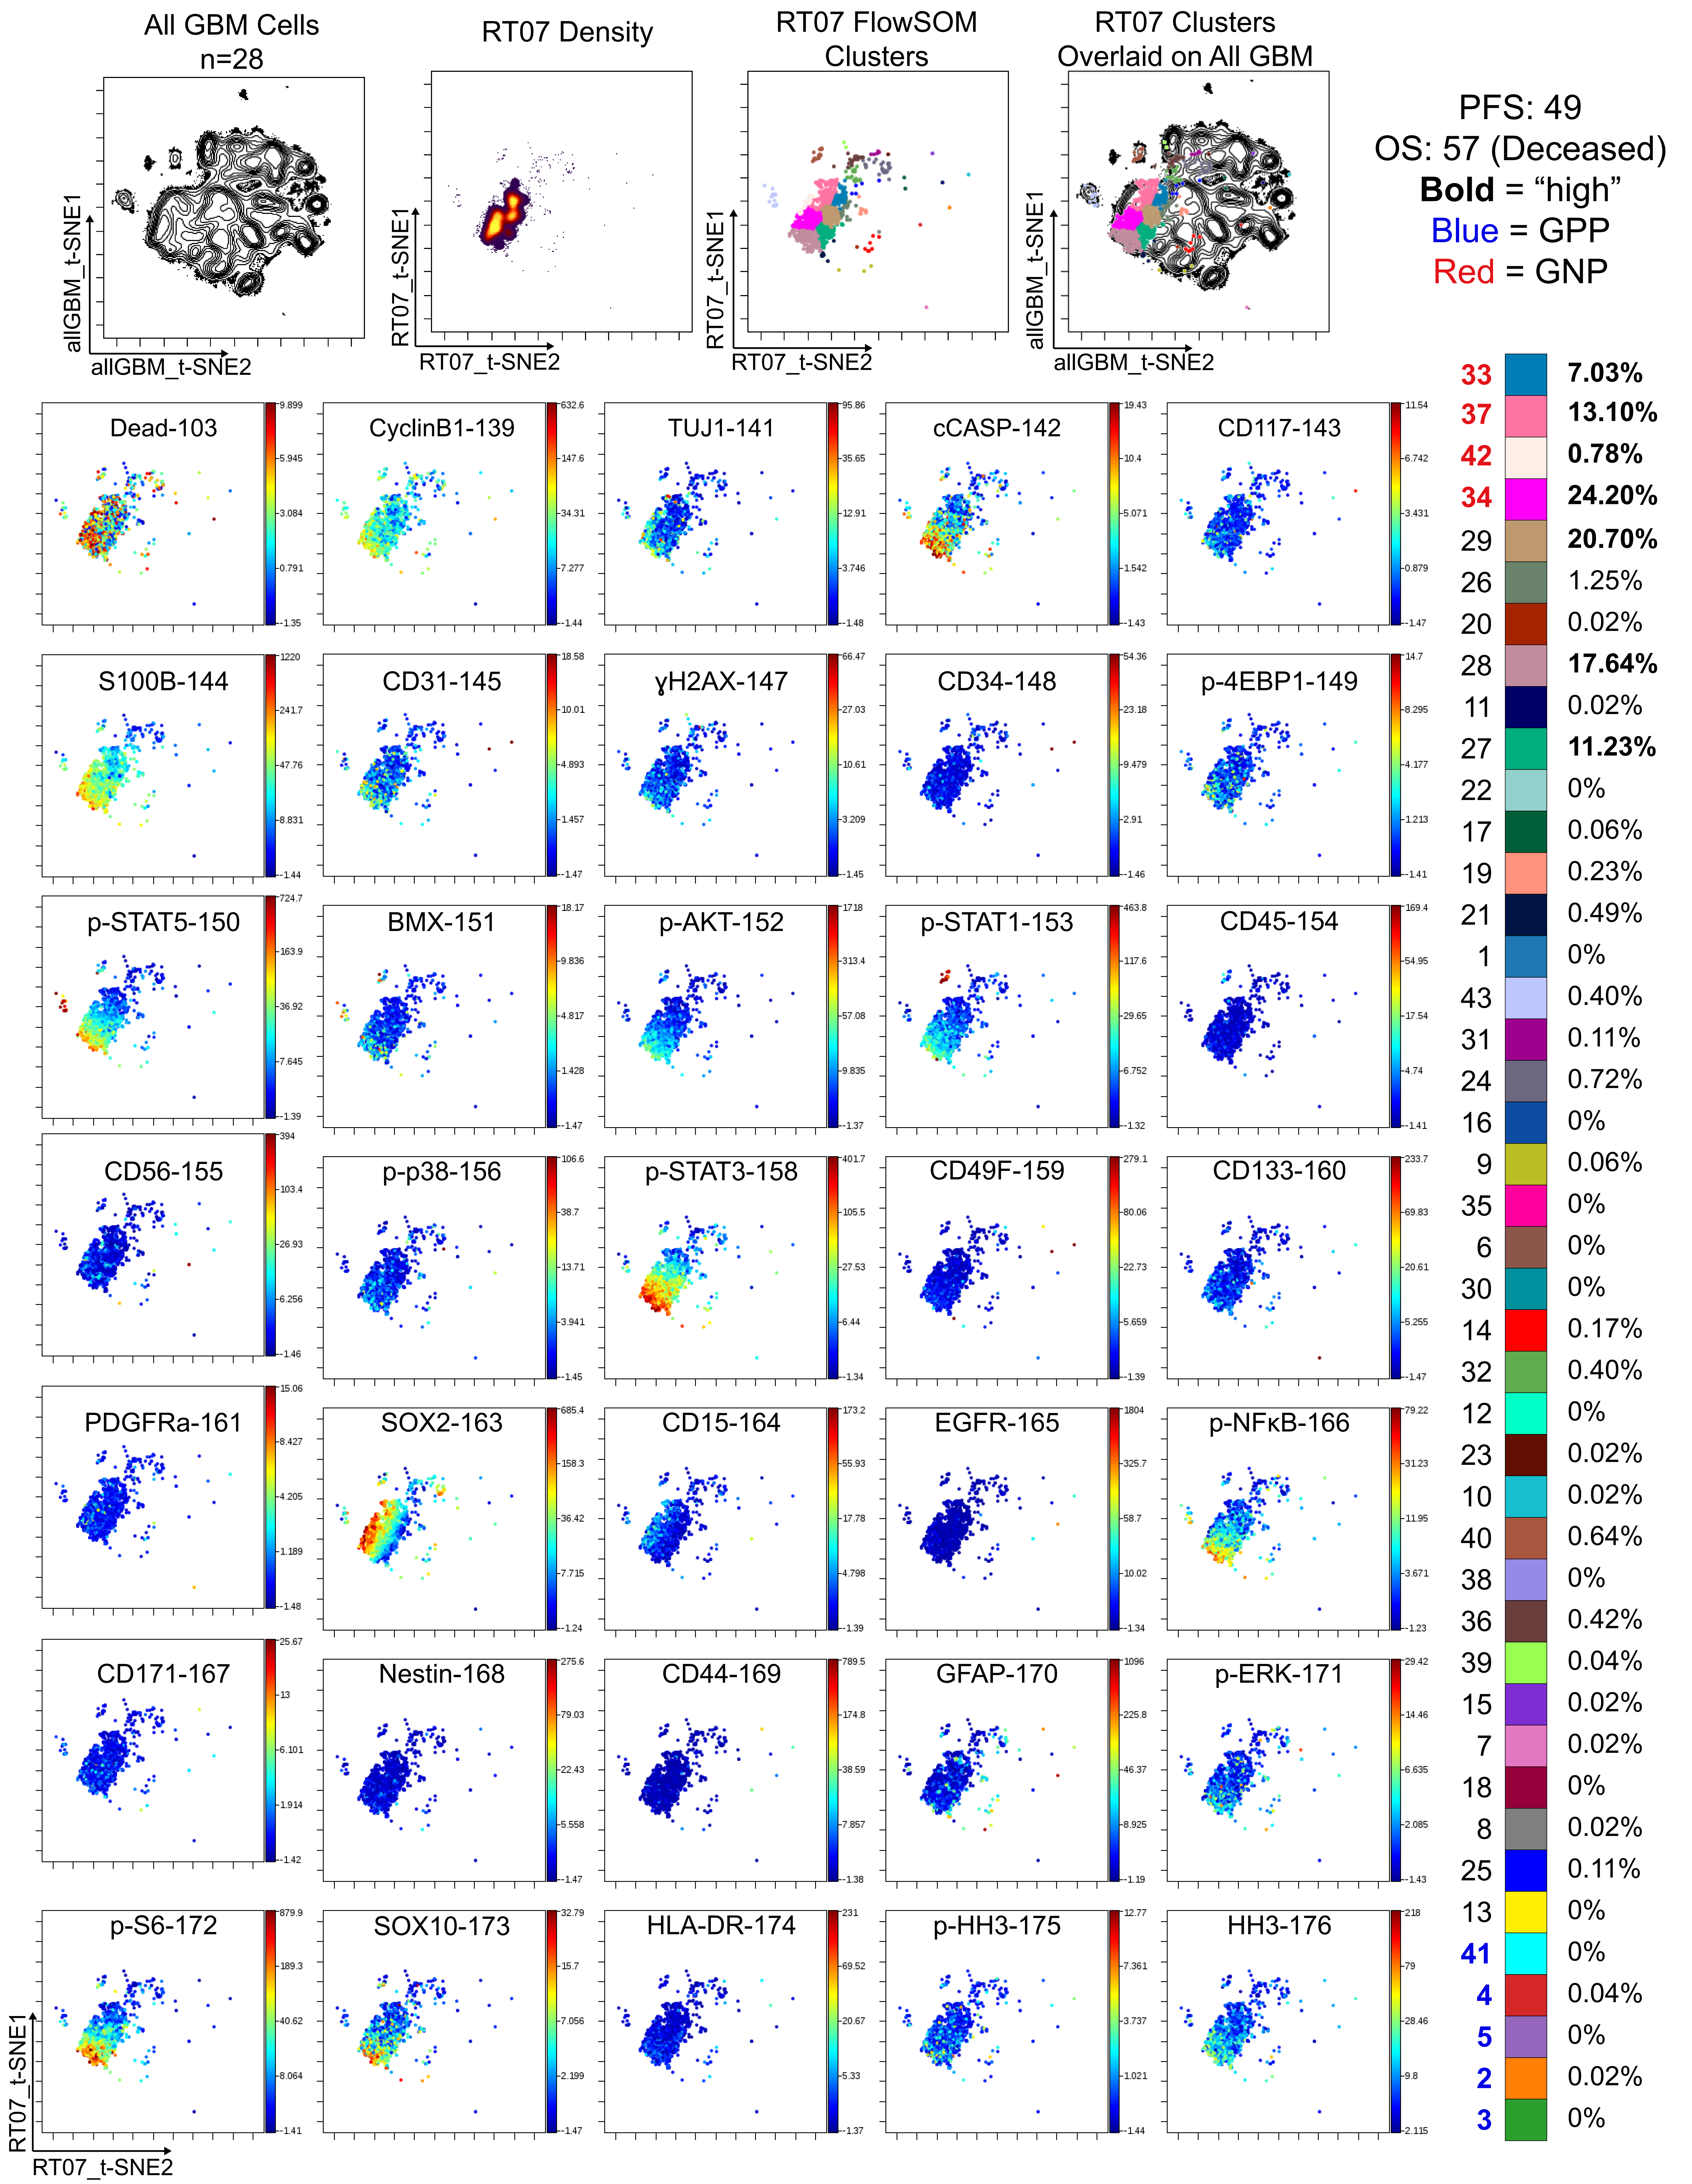



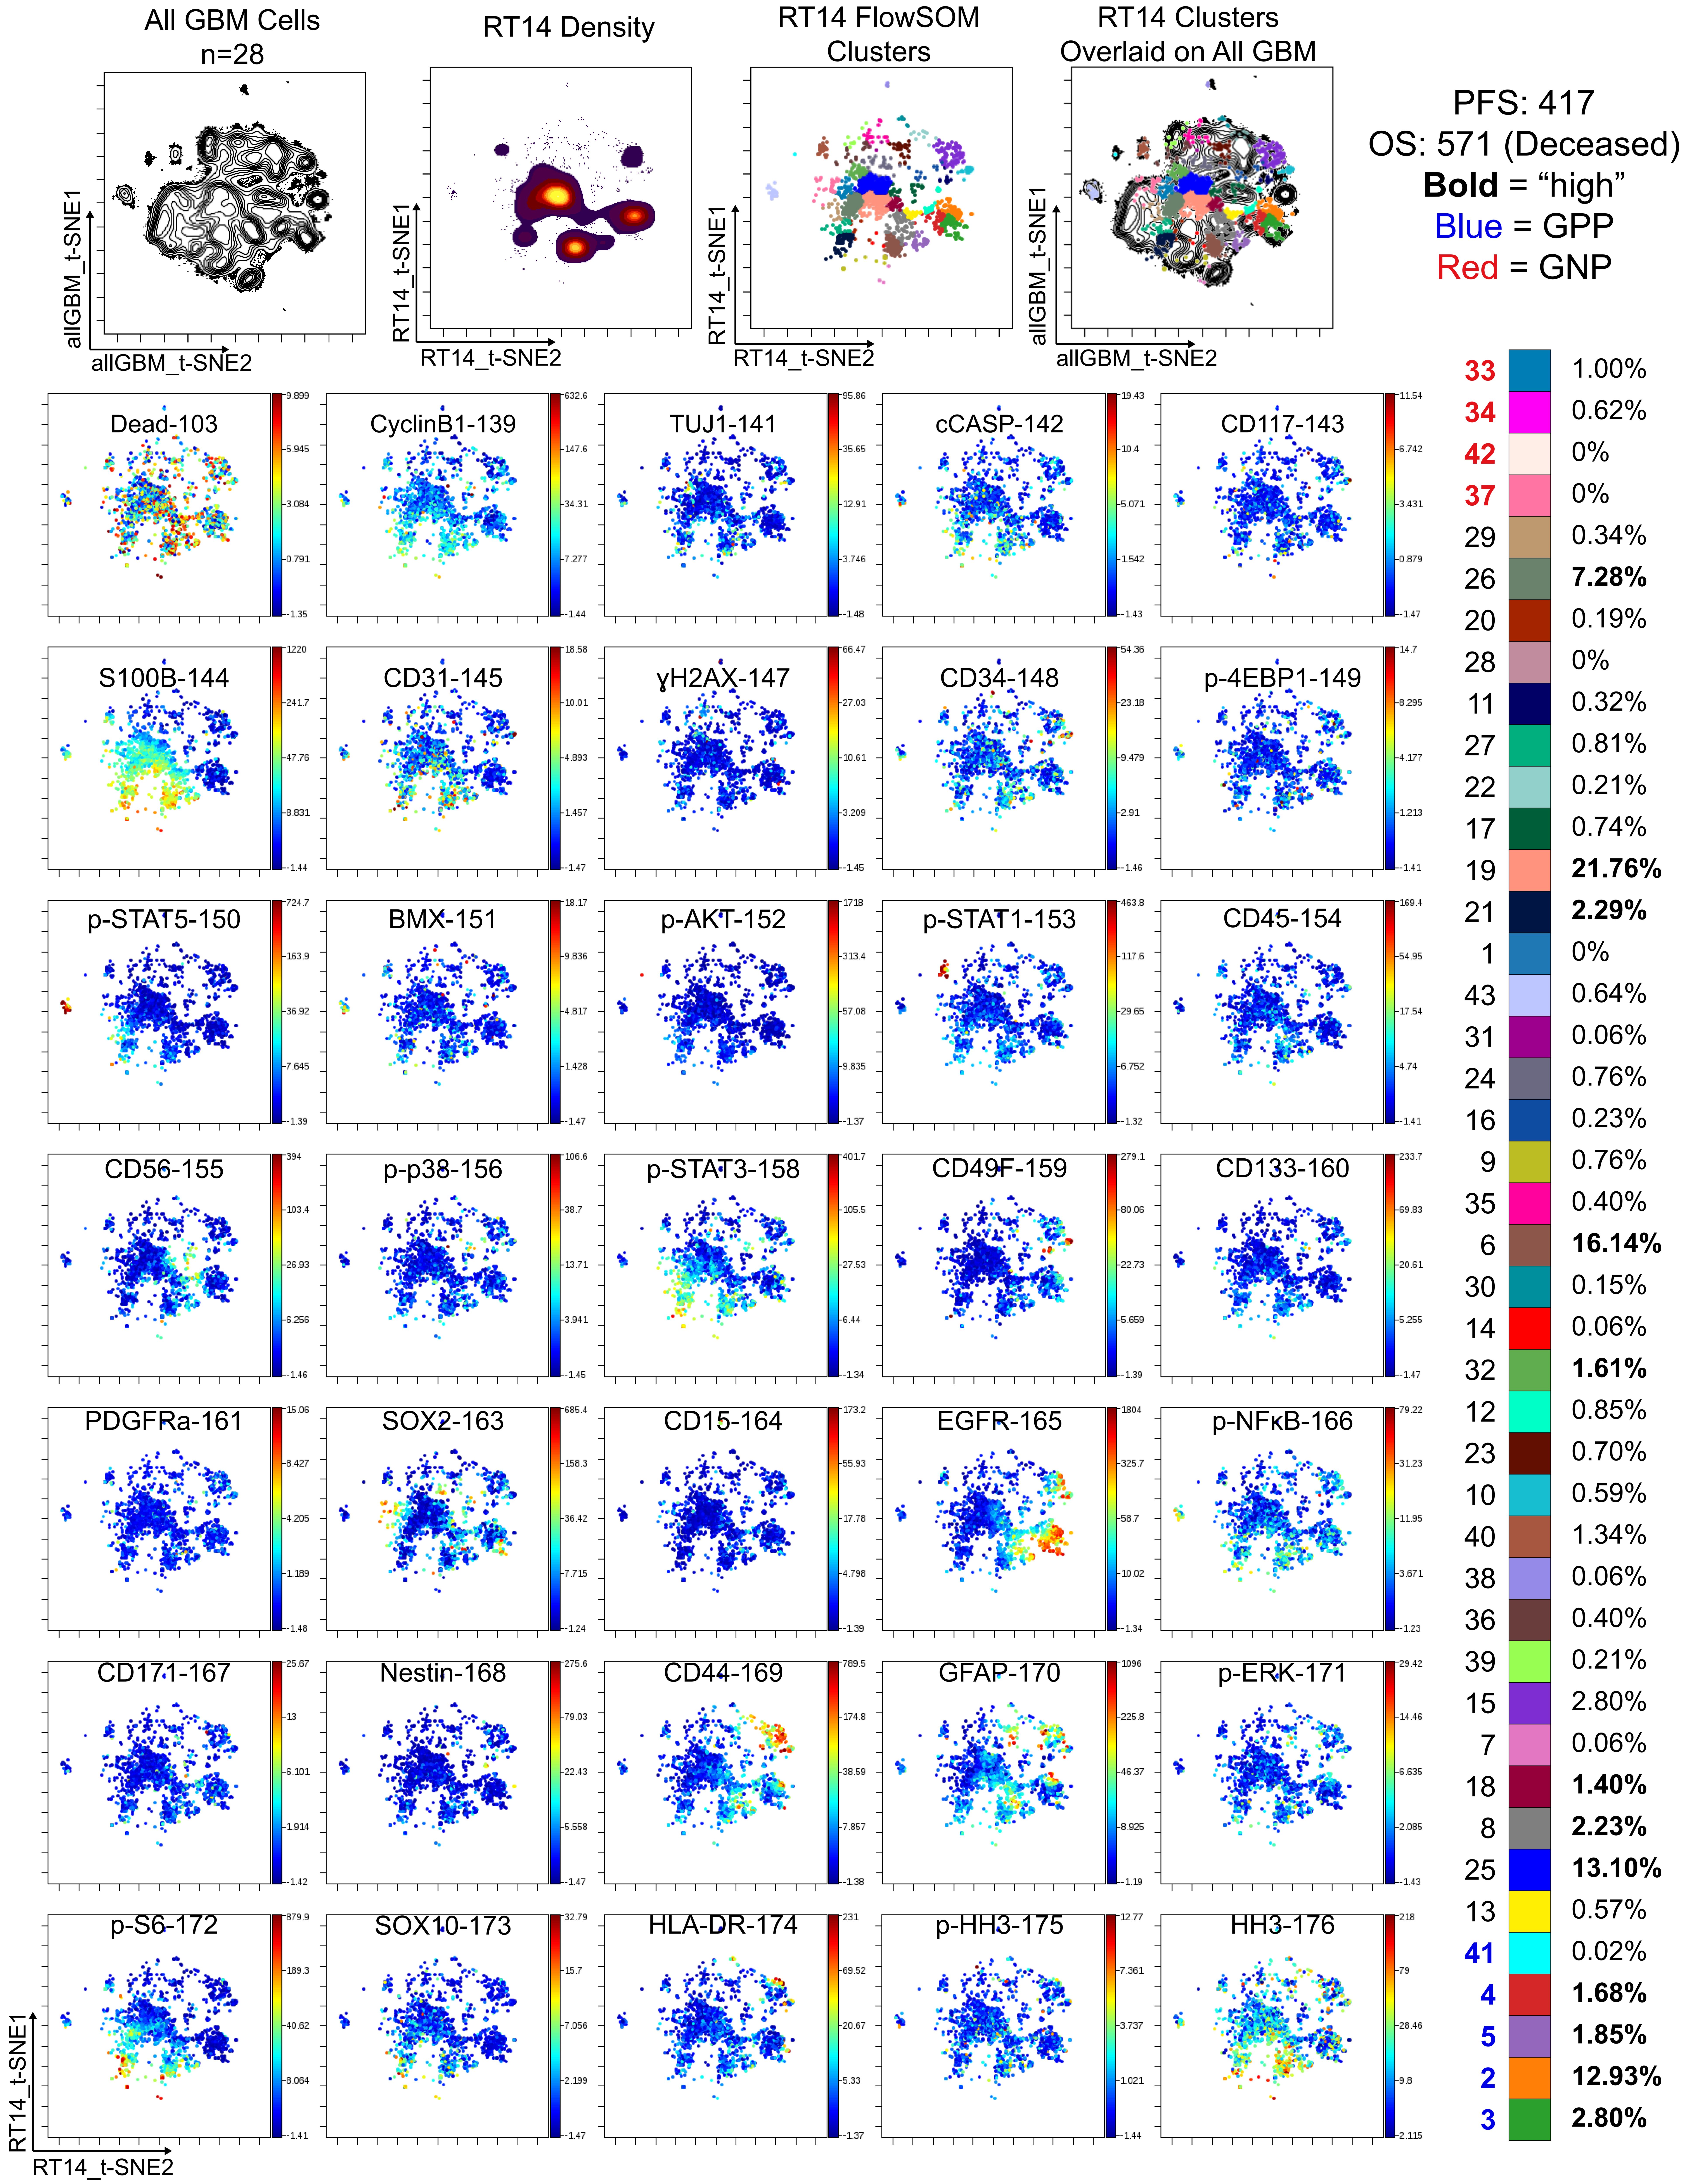



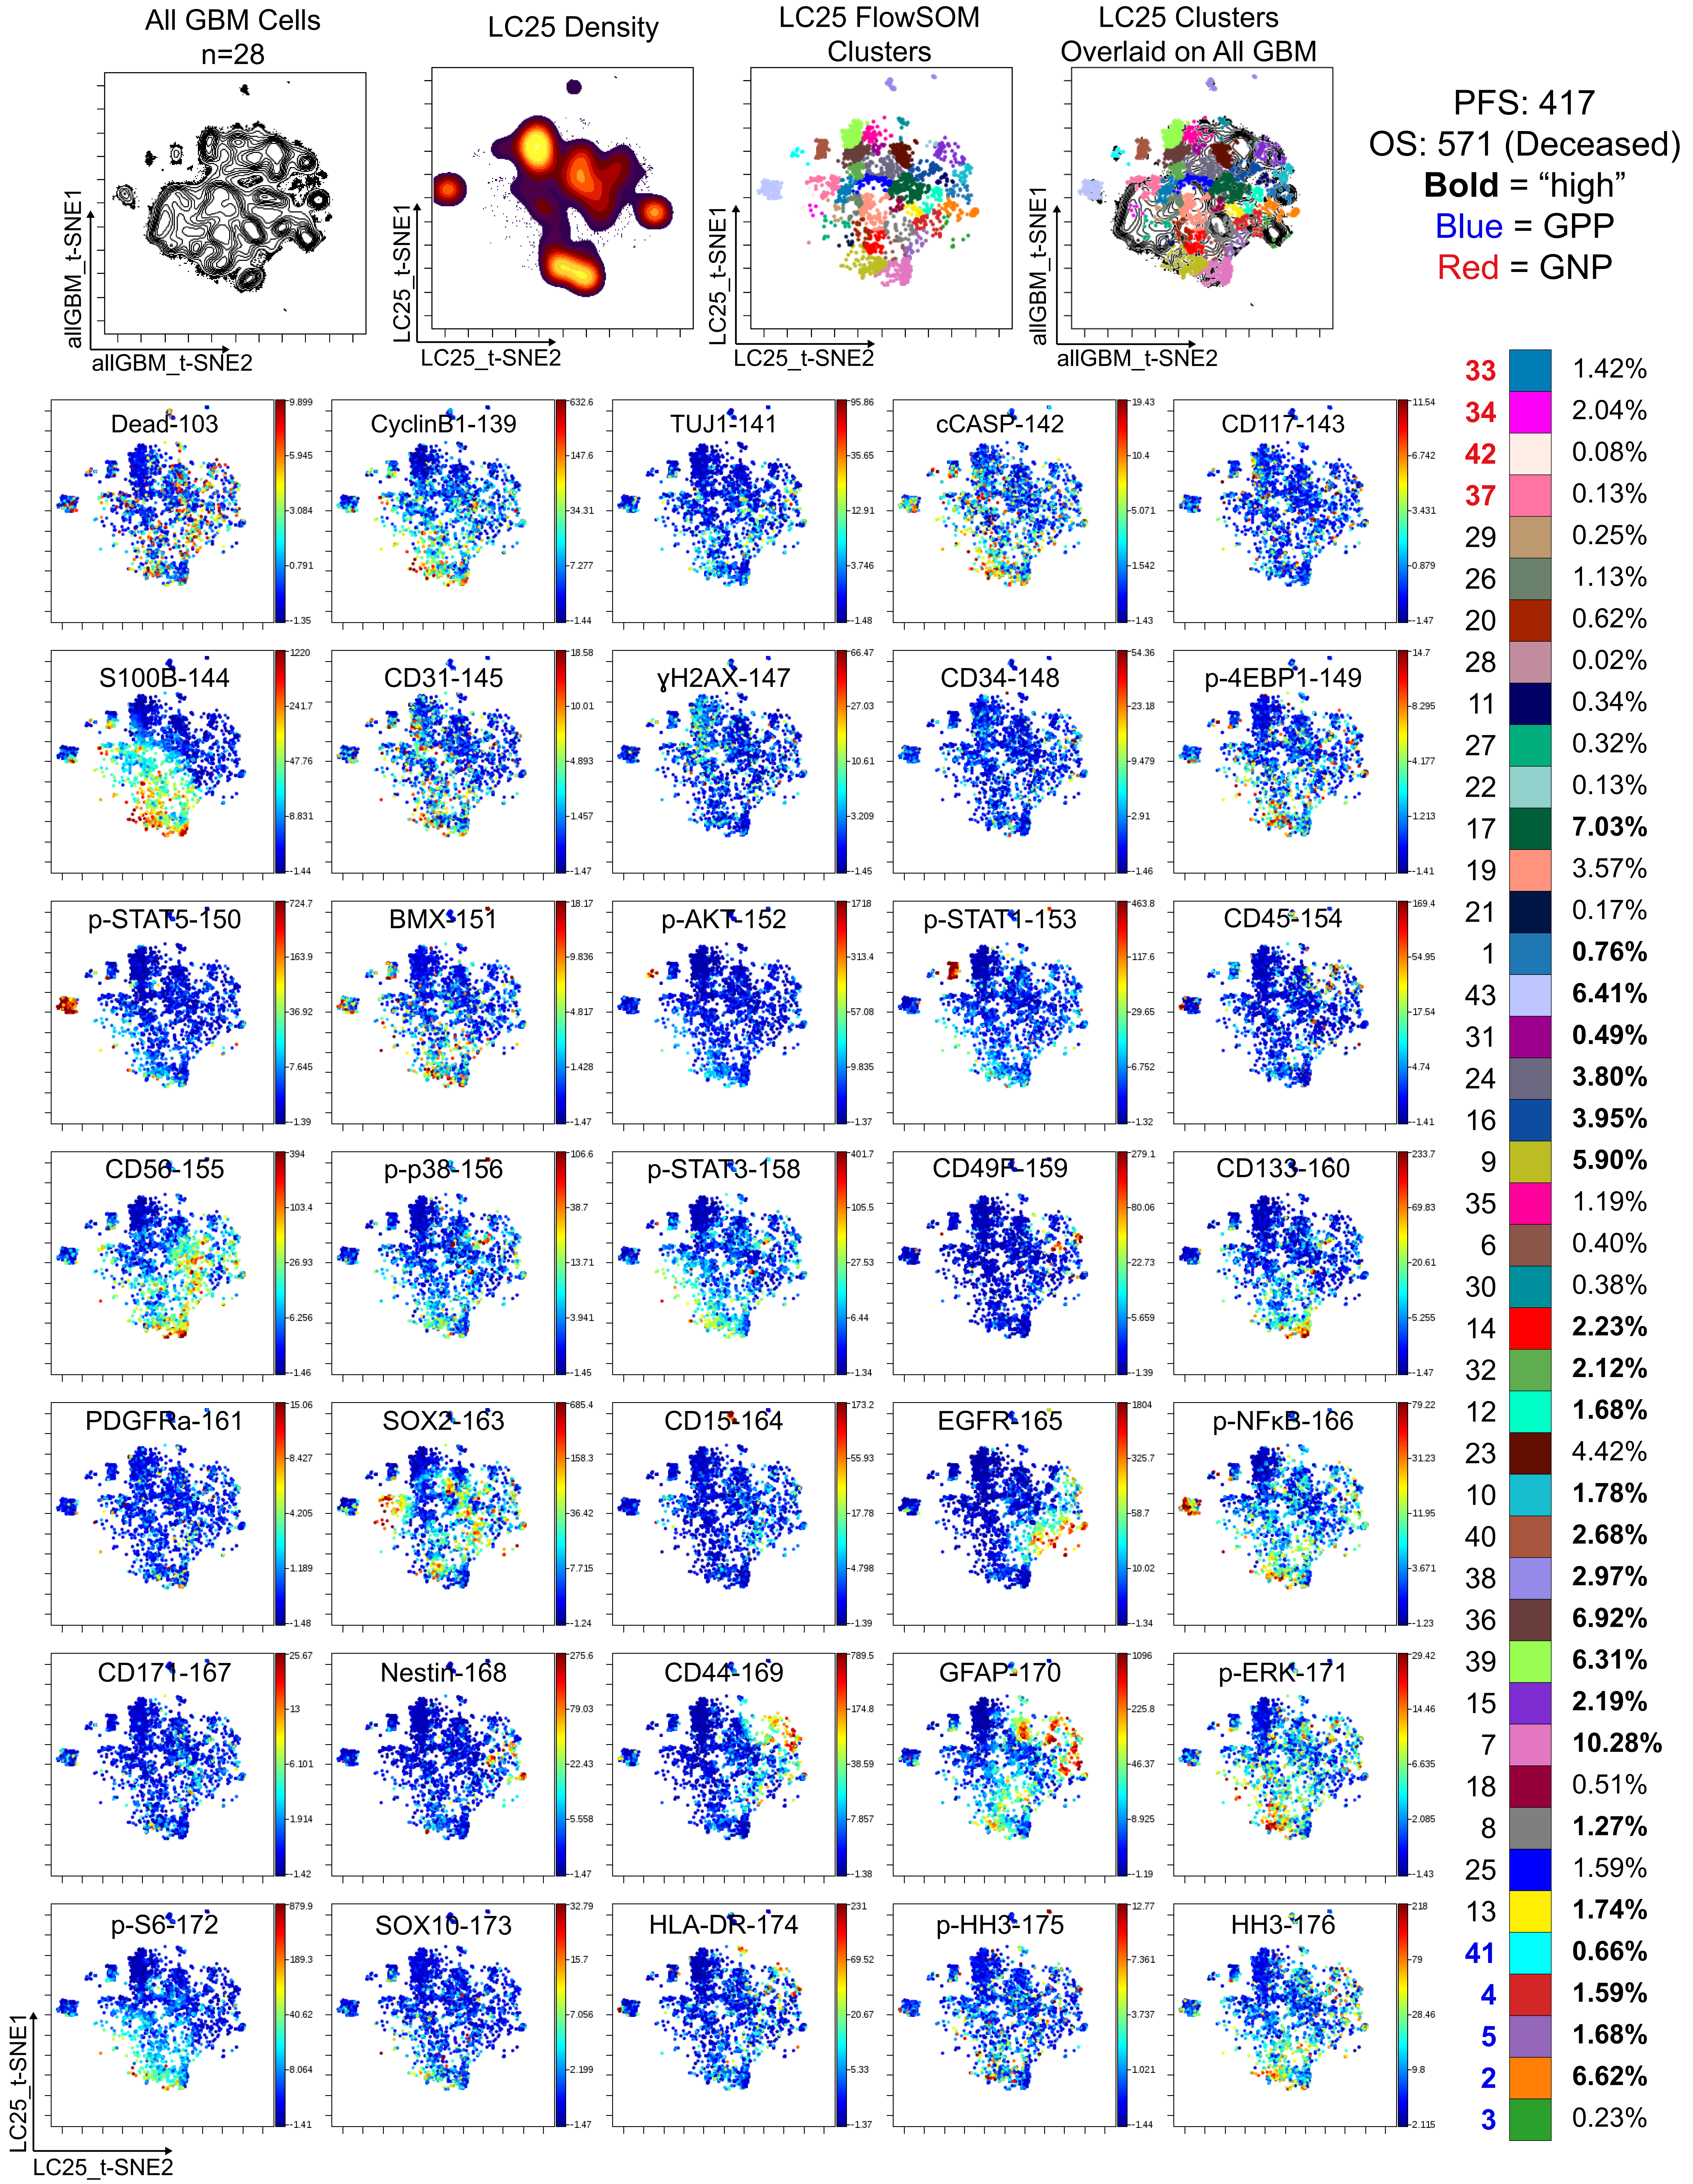



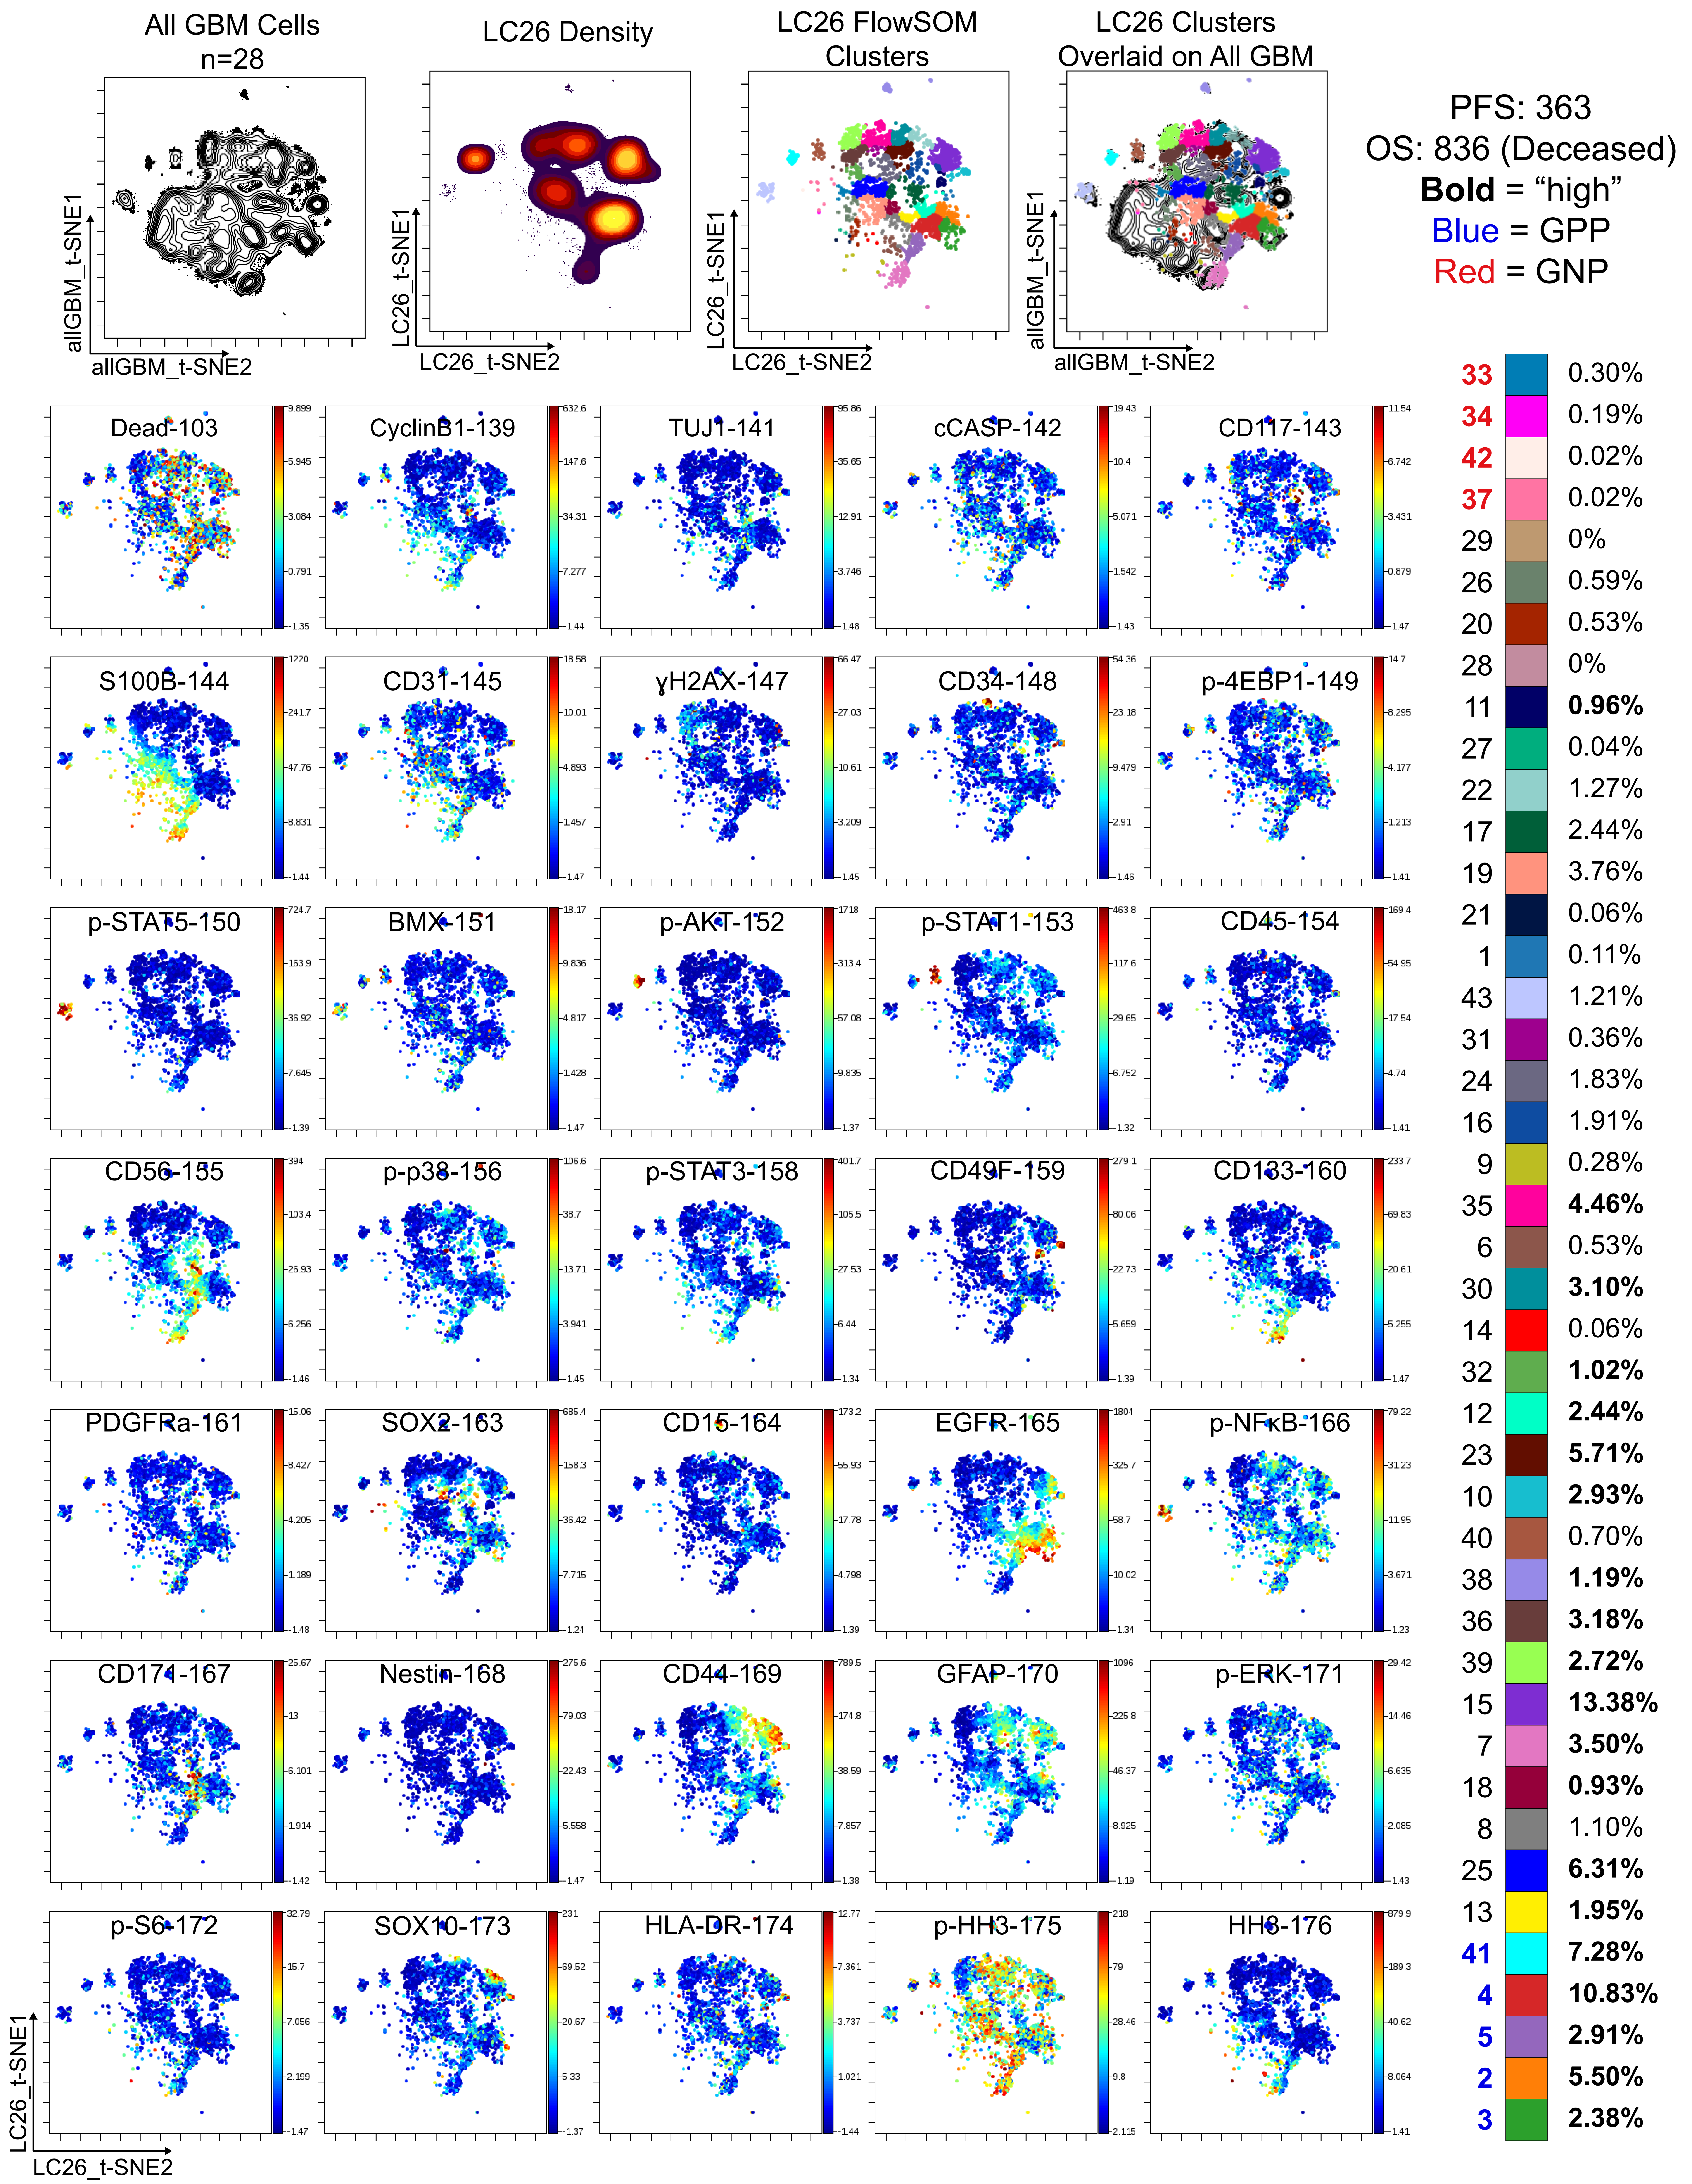



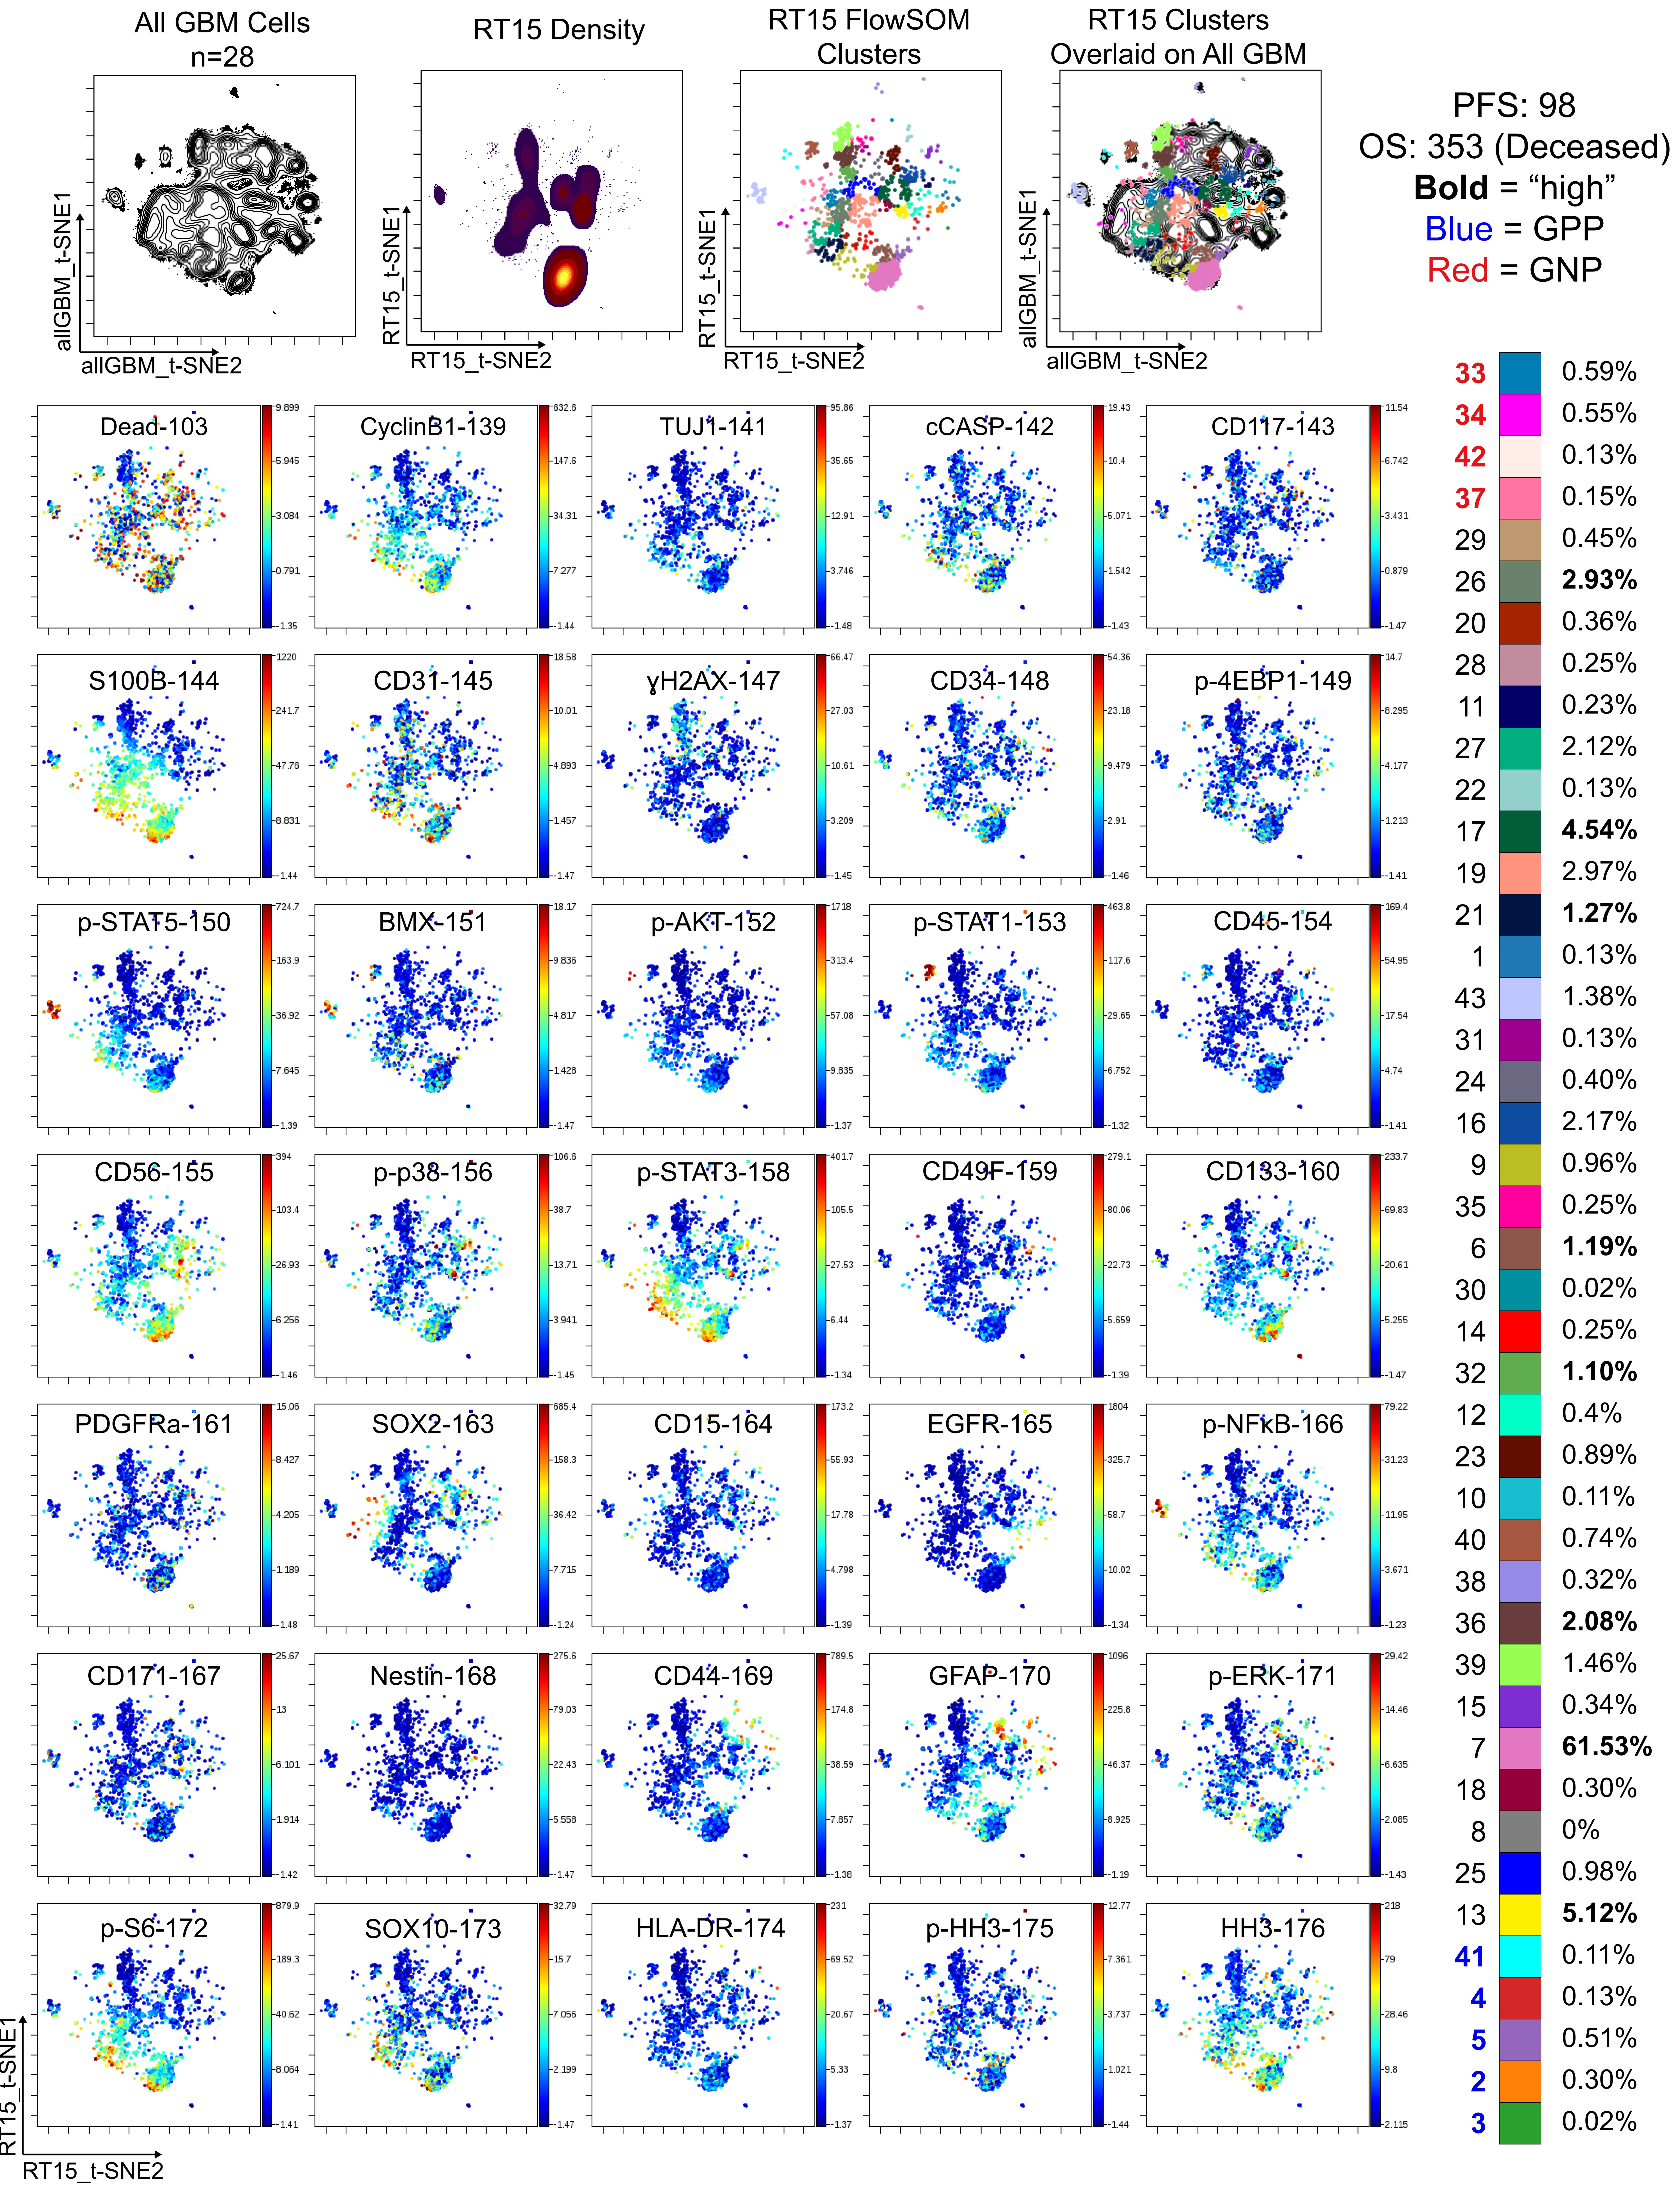



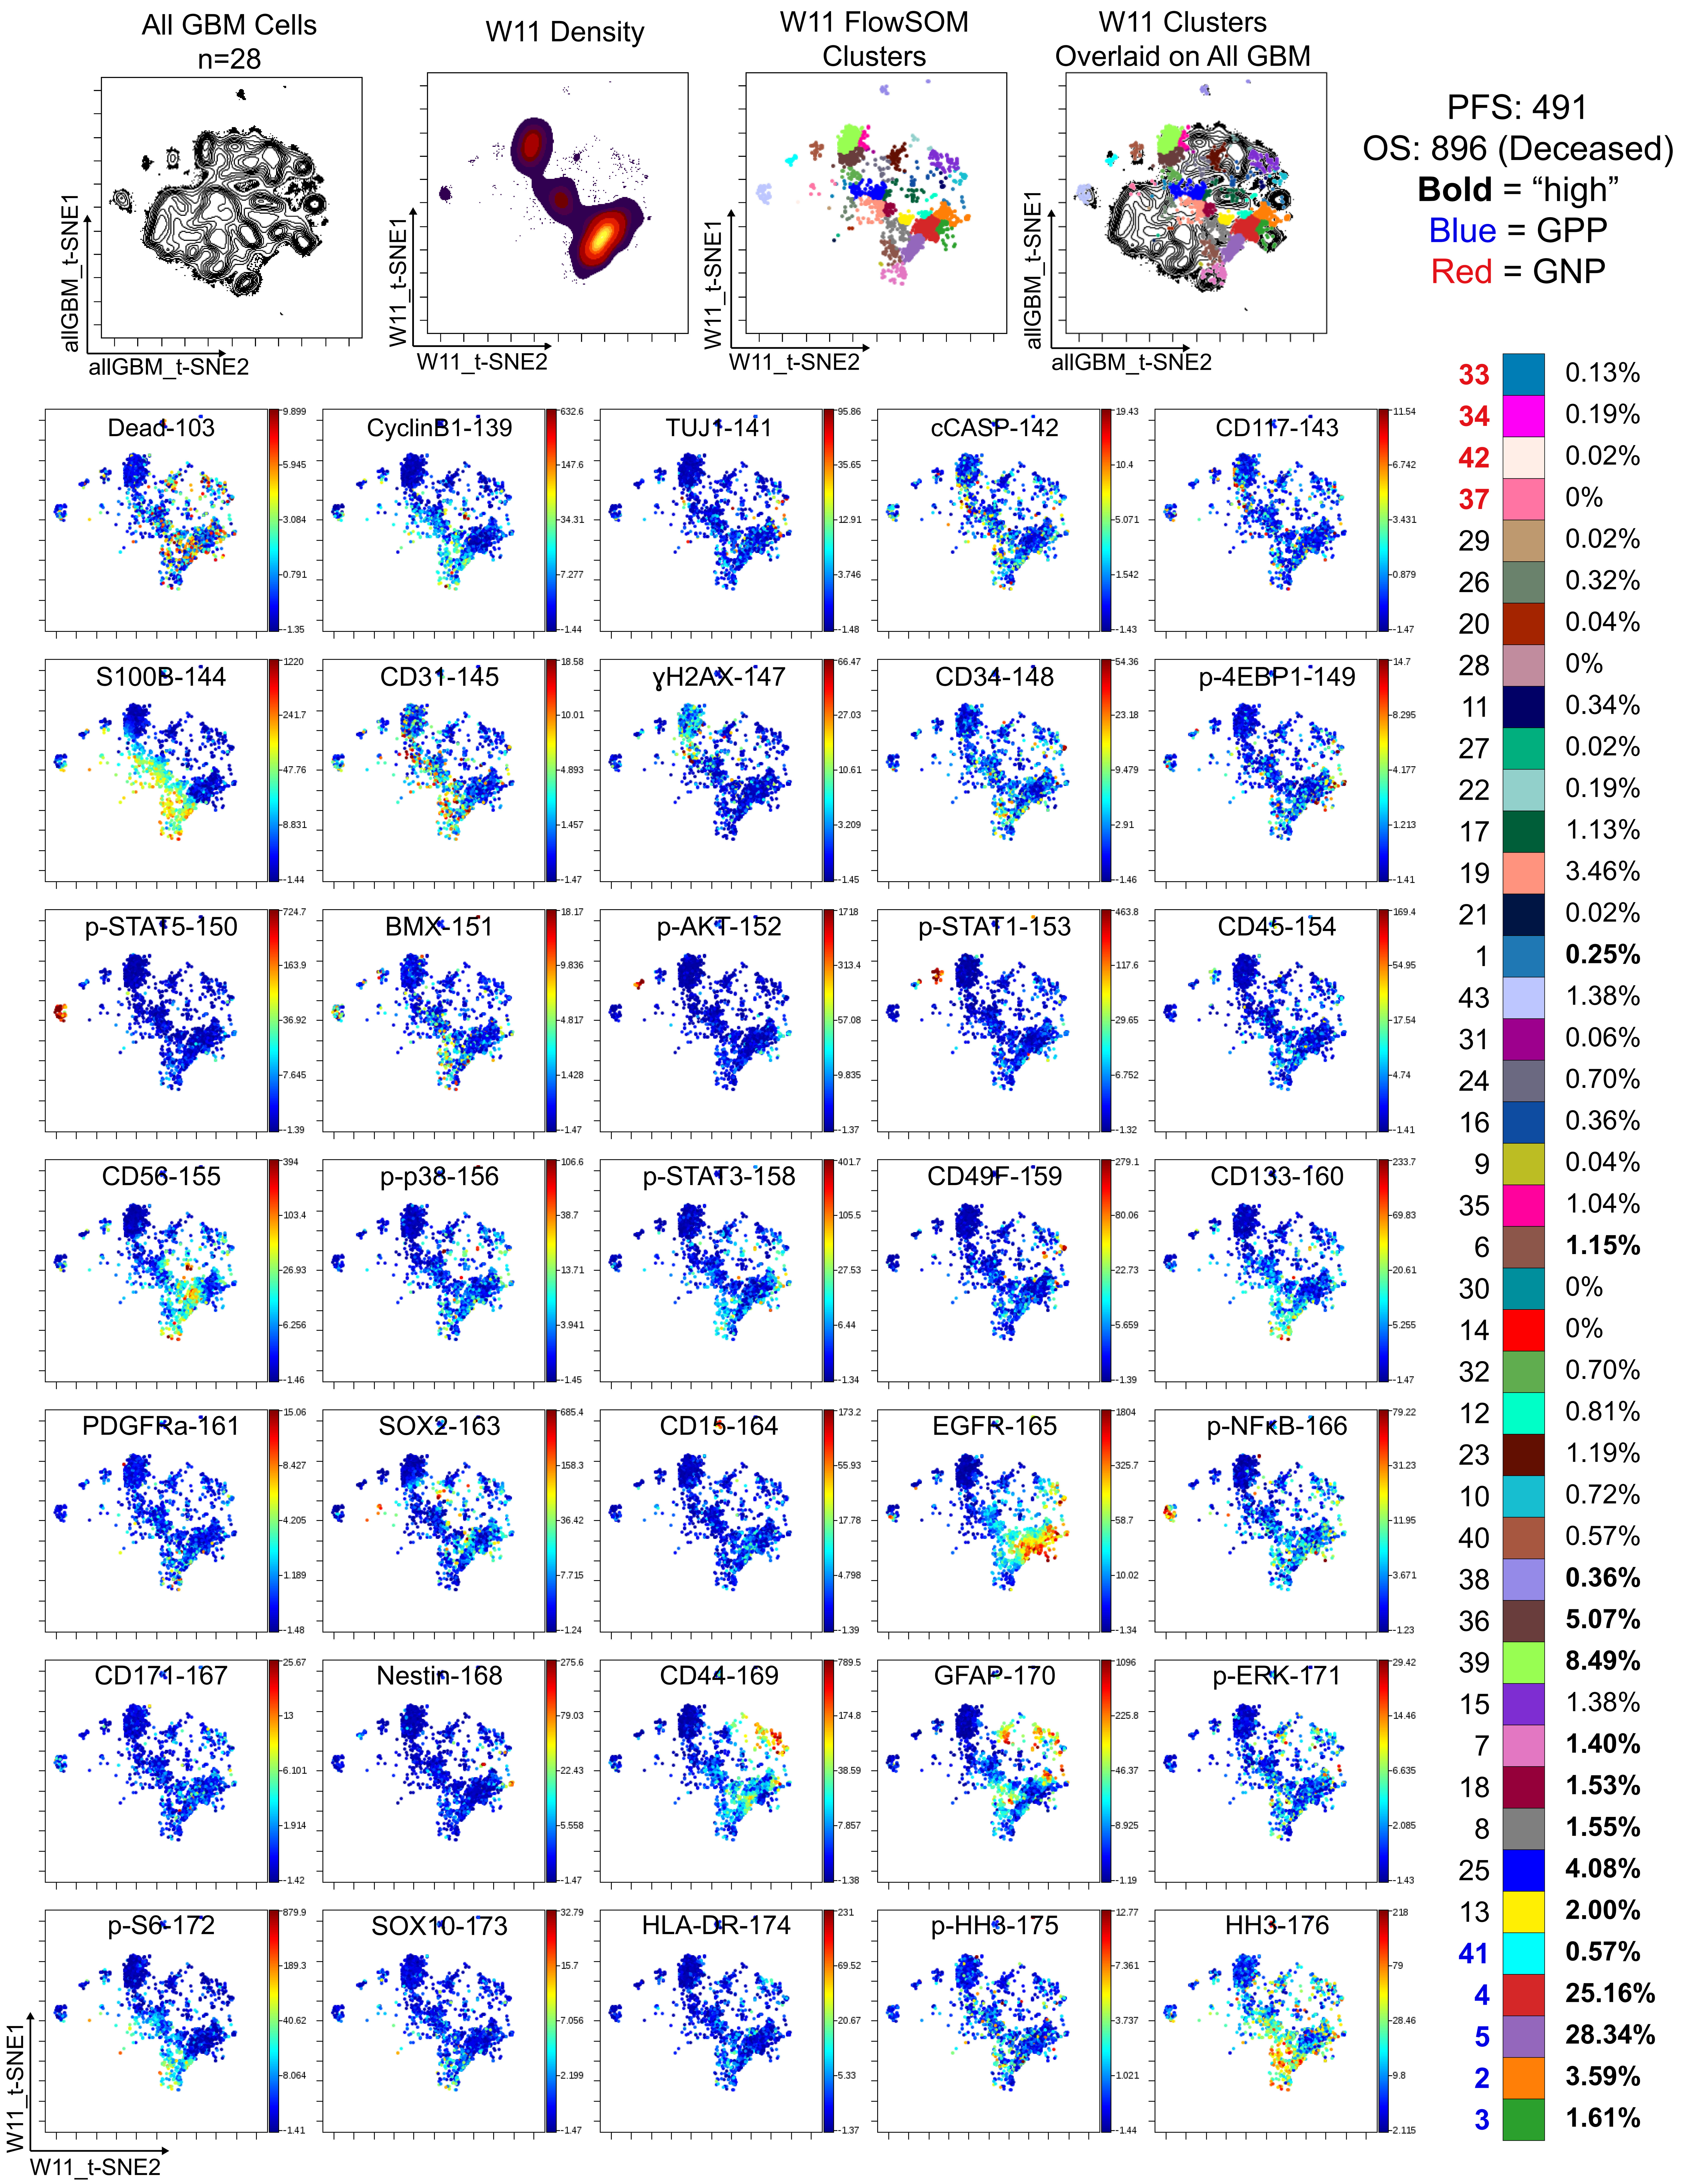



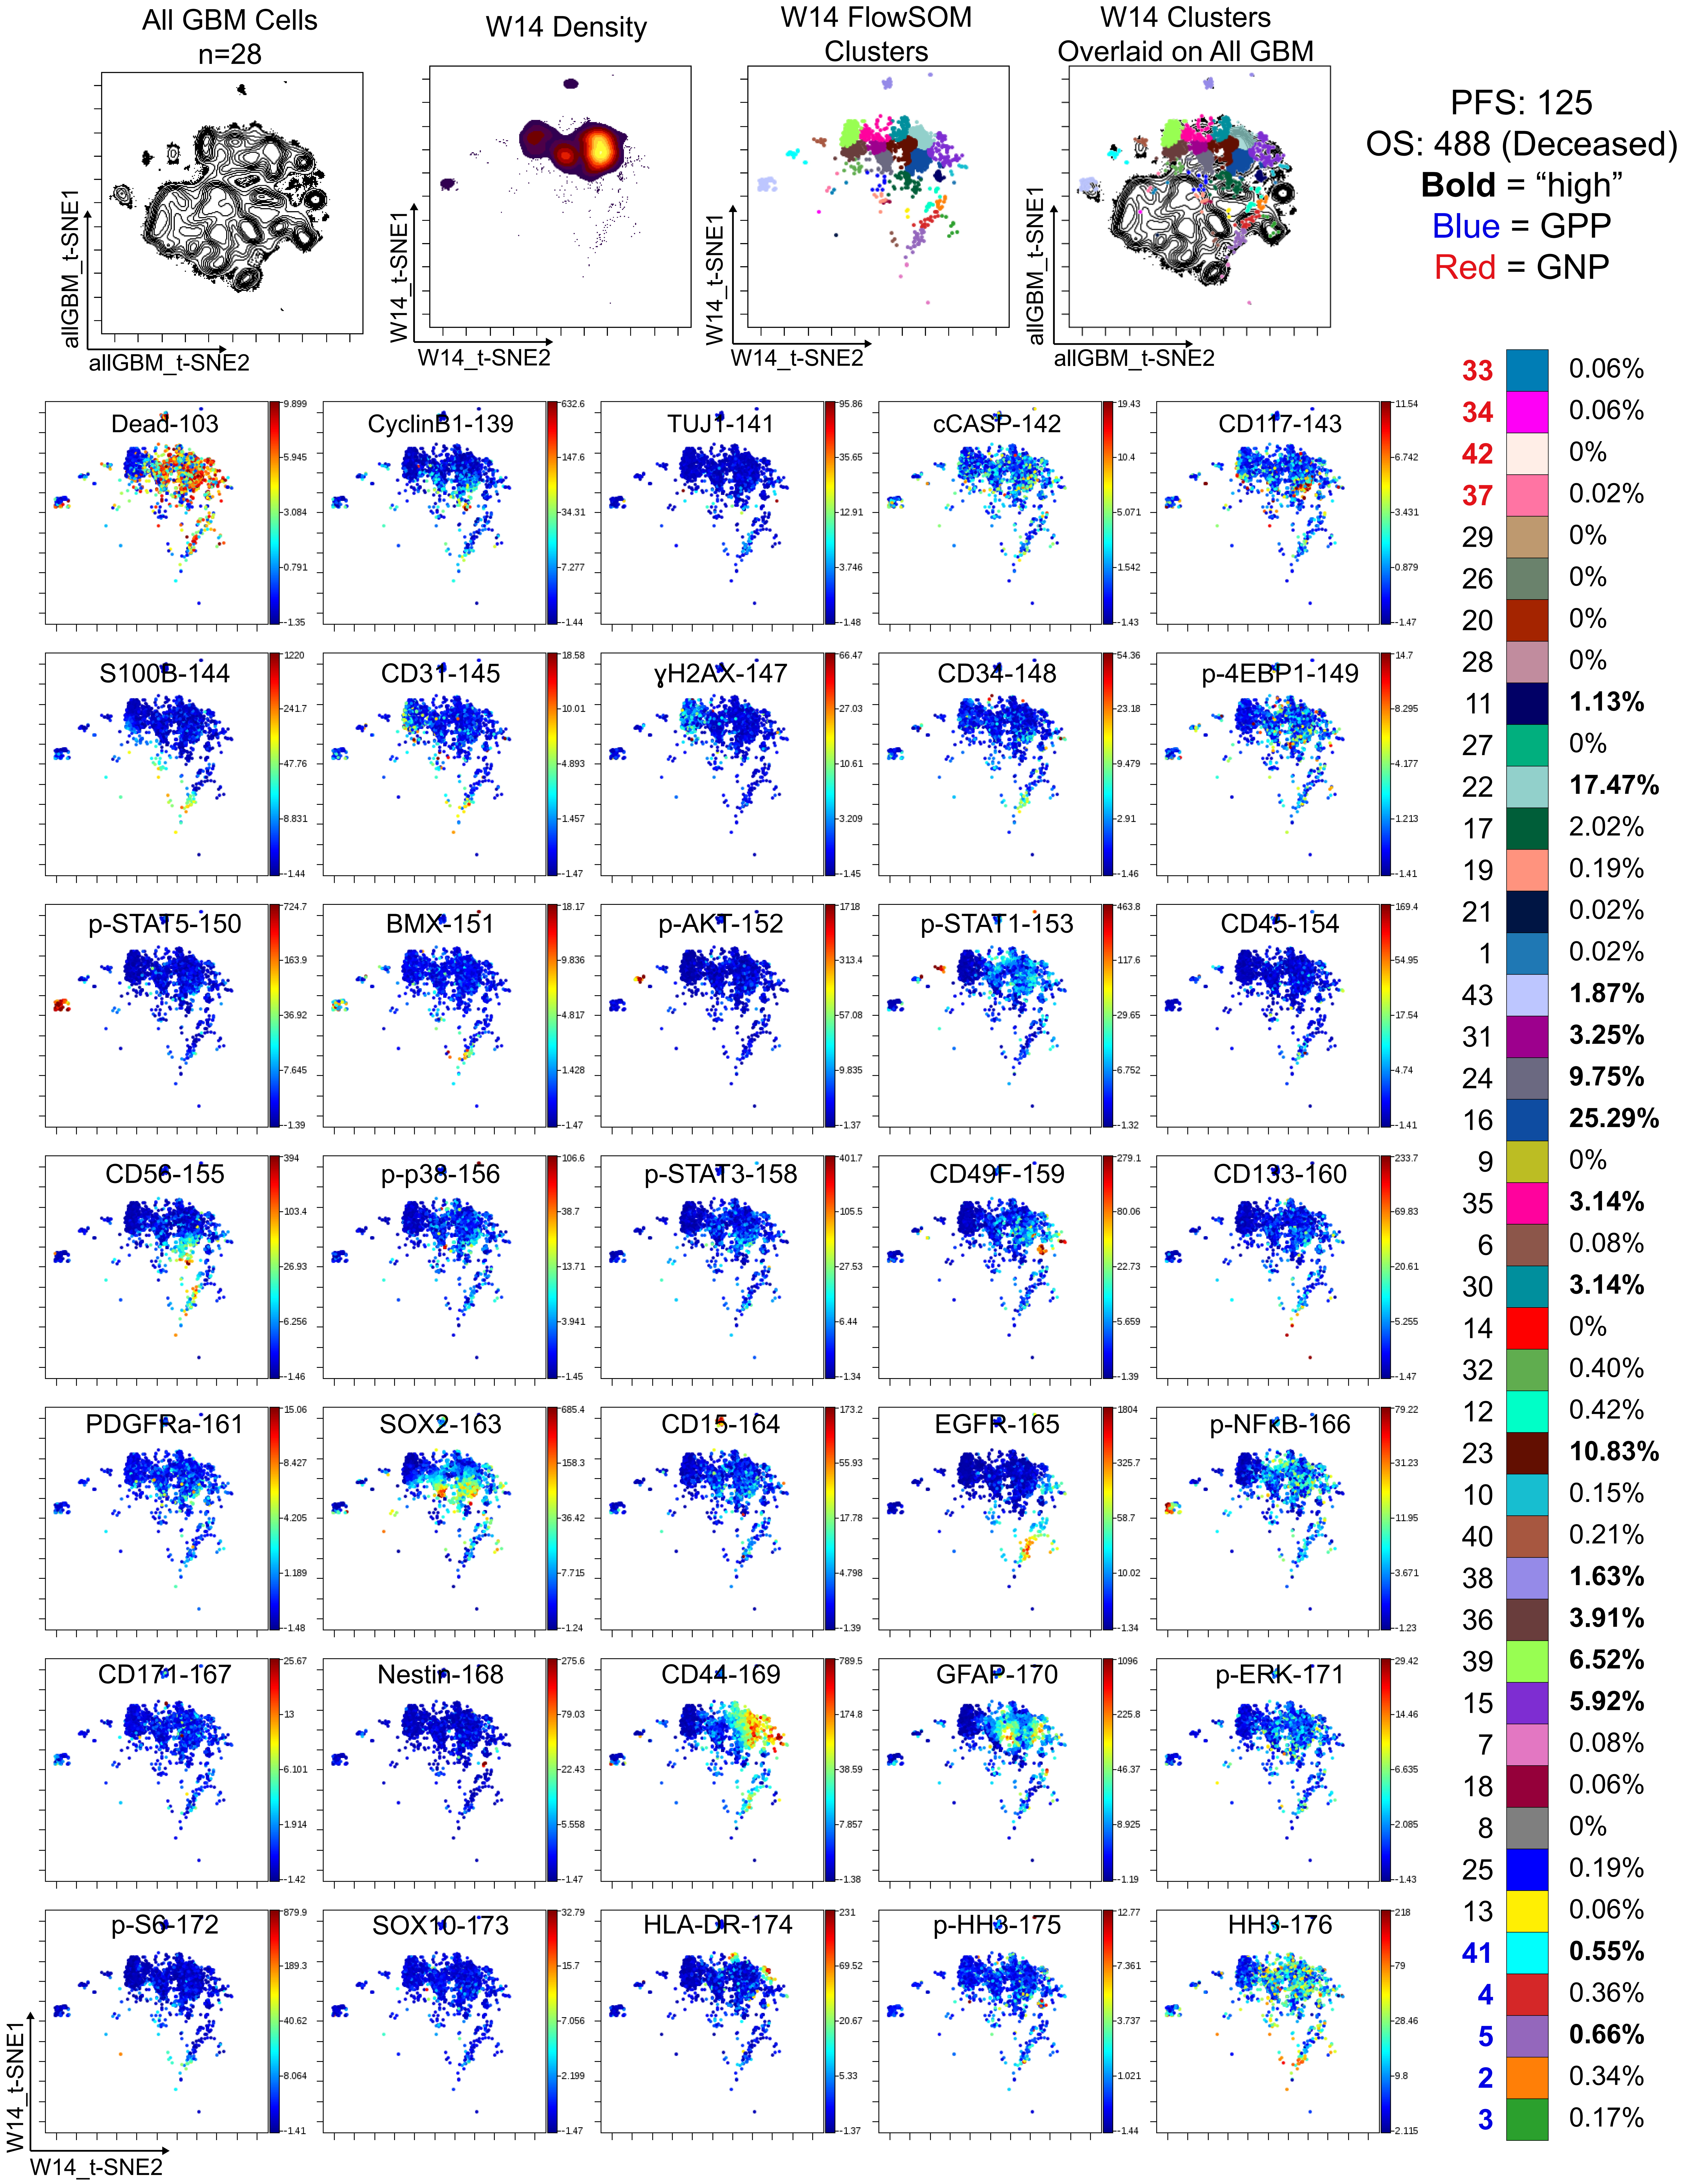



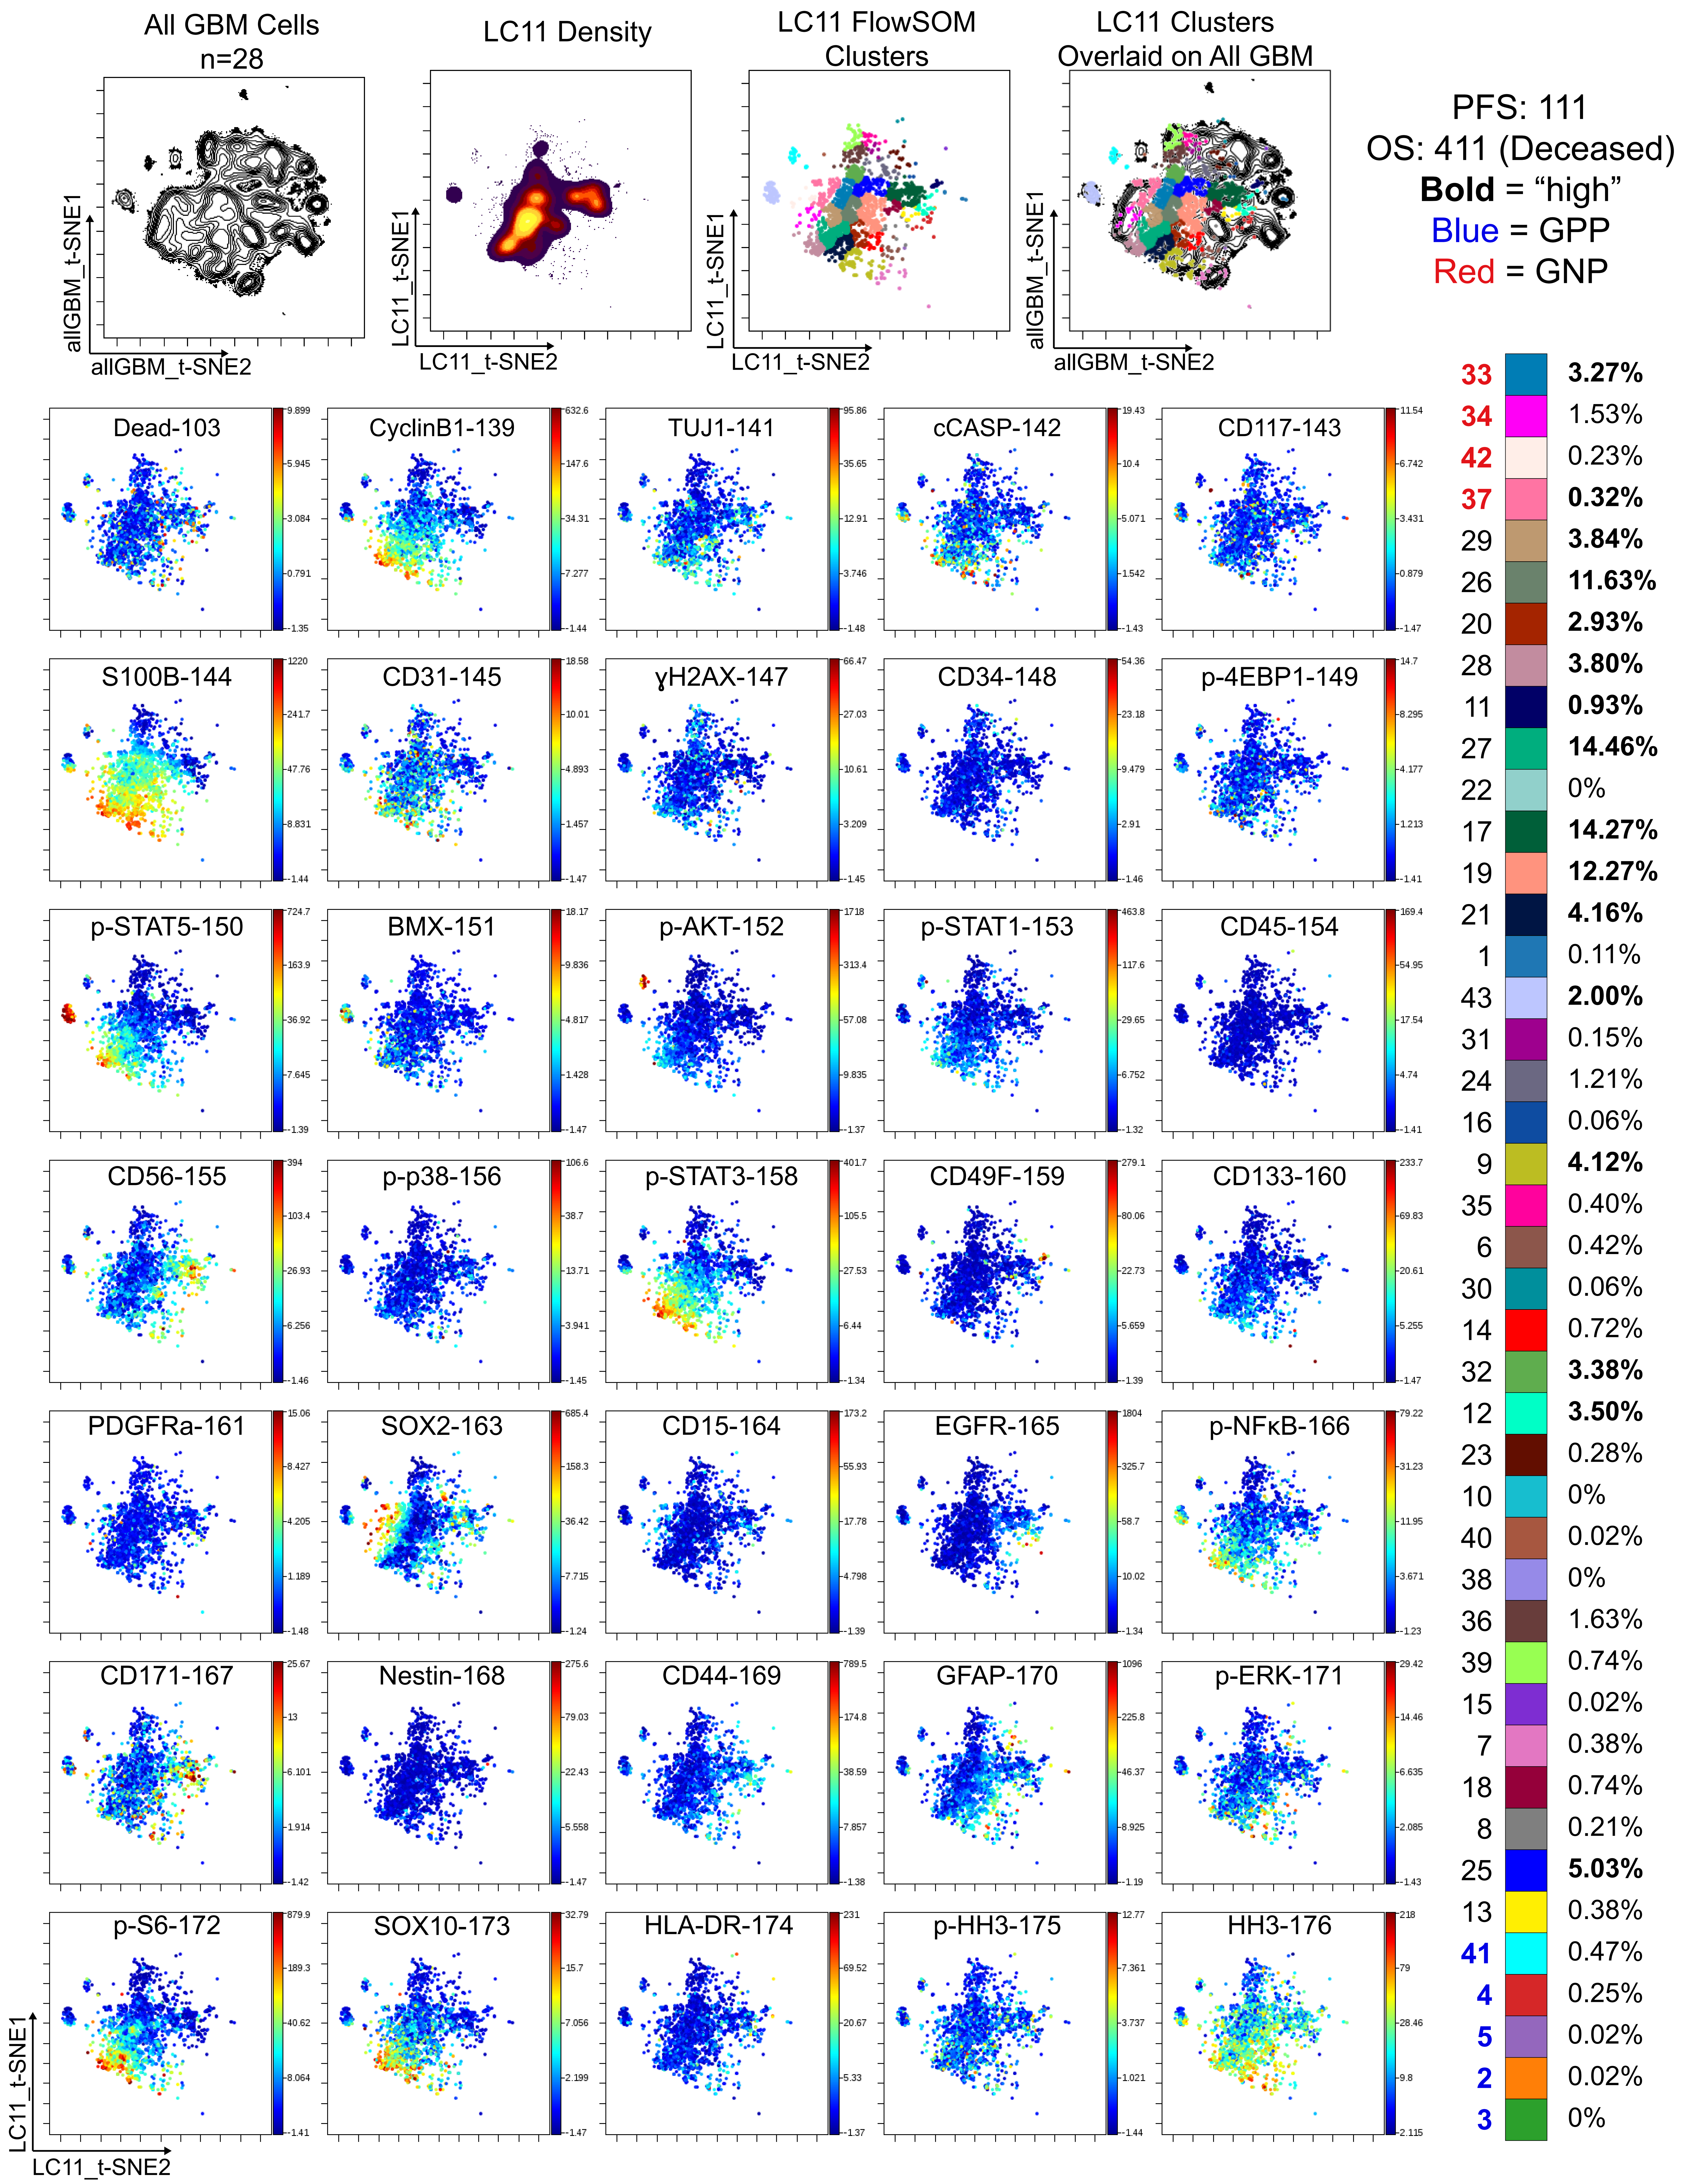



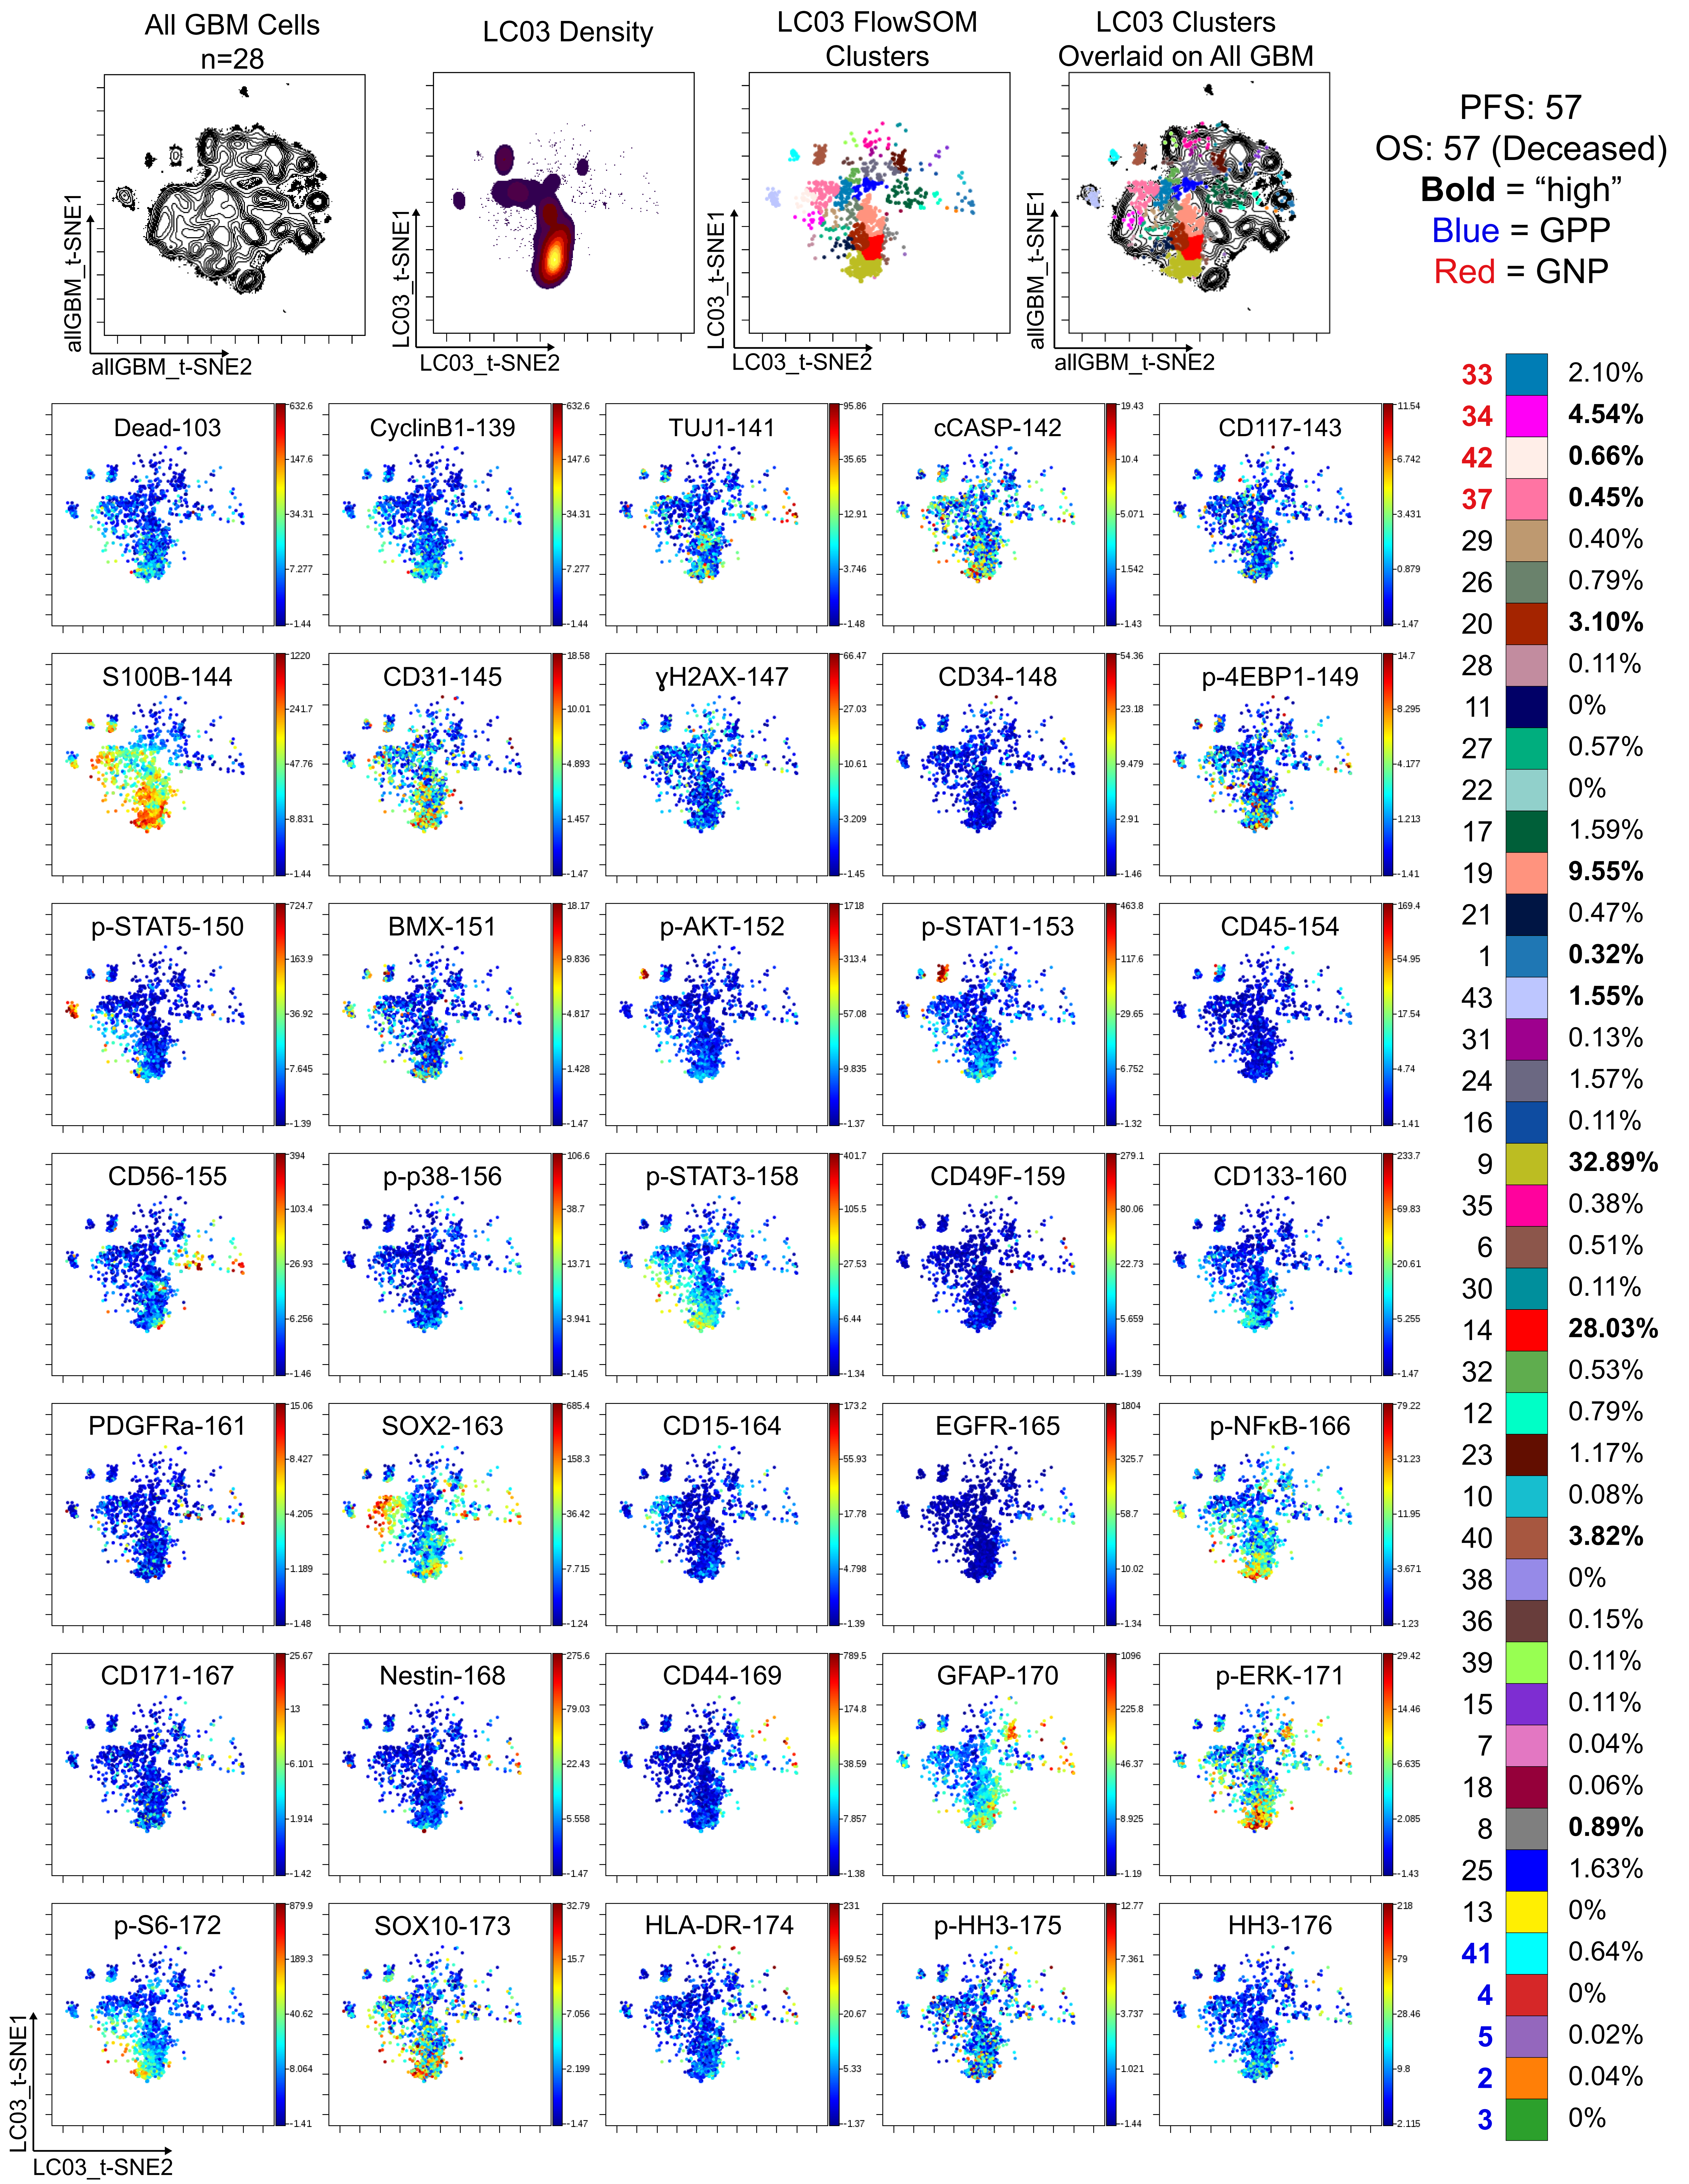



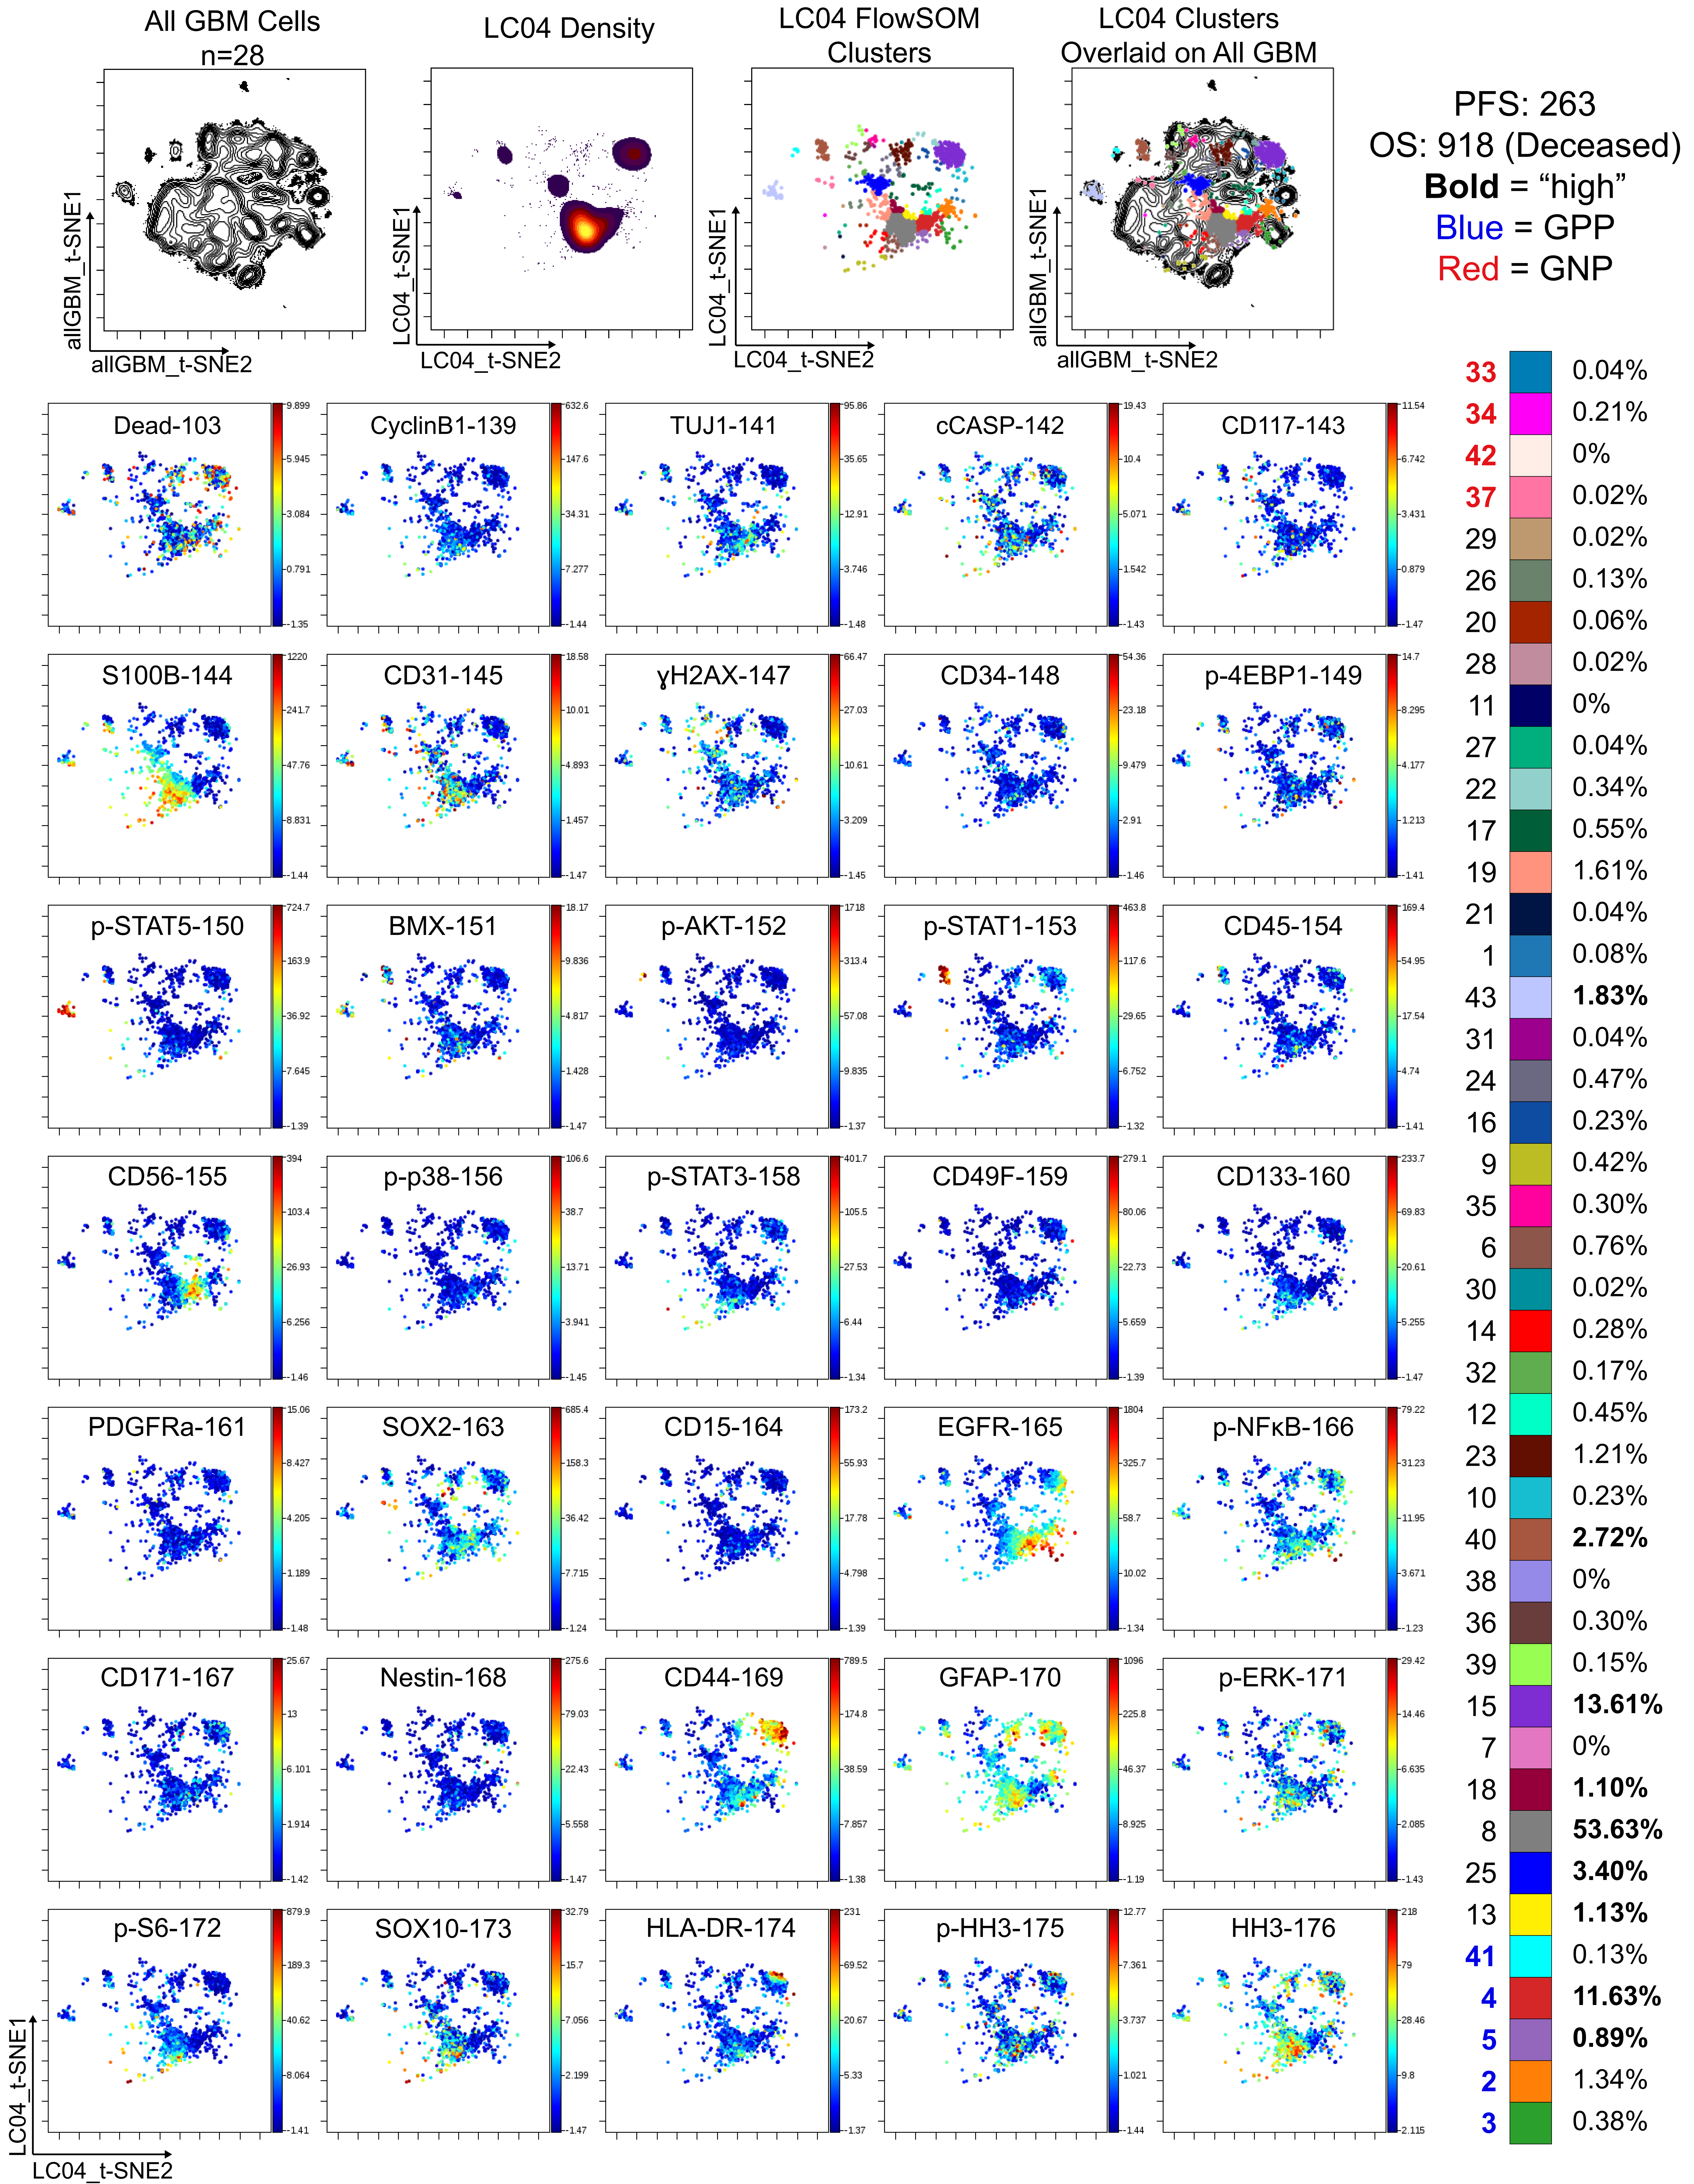



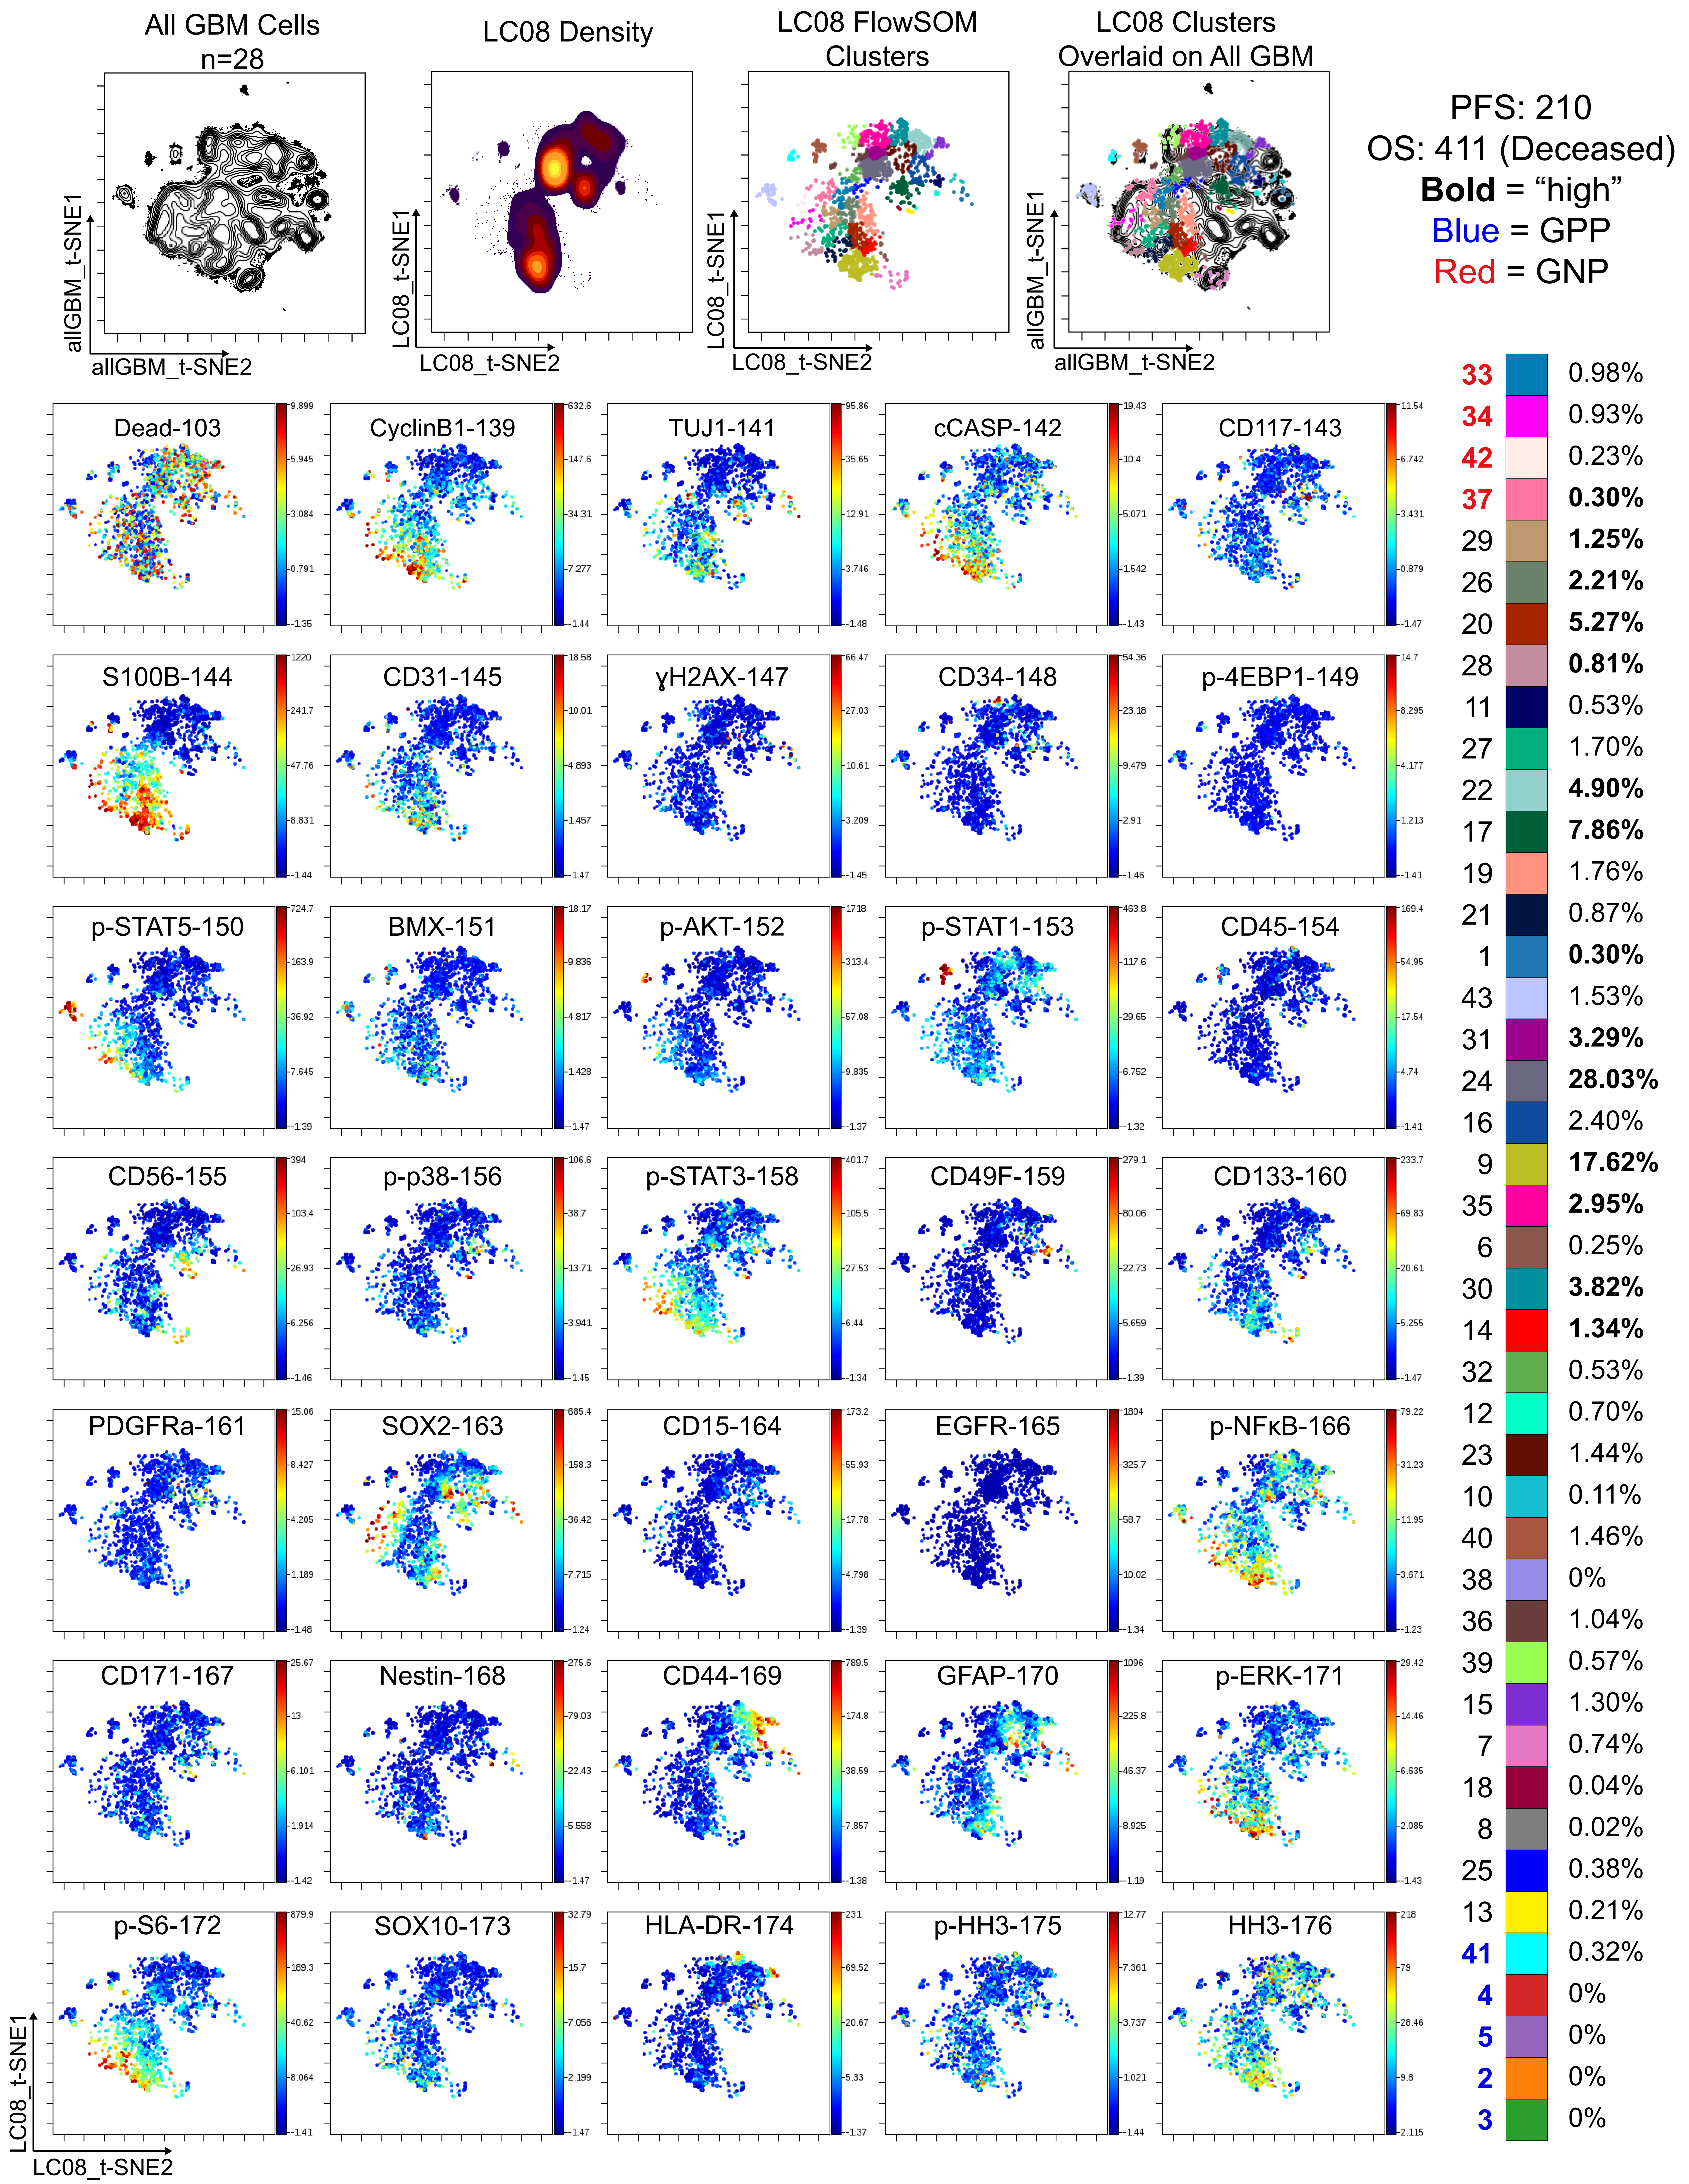

LC08\_t-SNE1





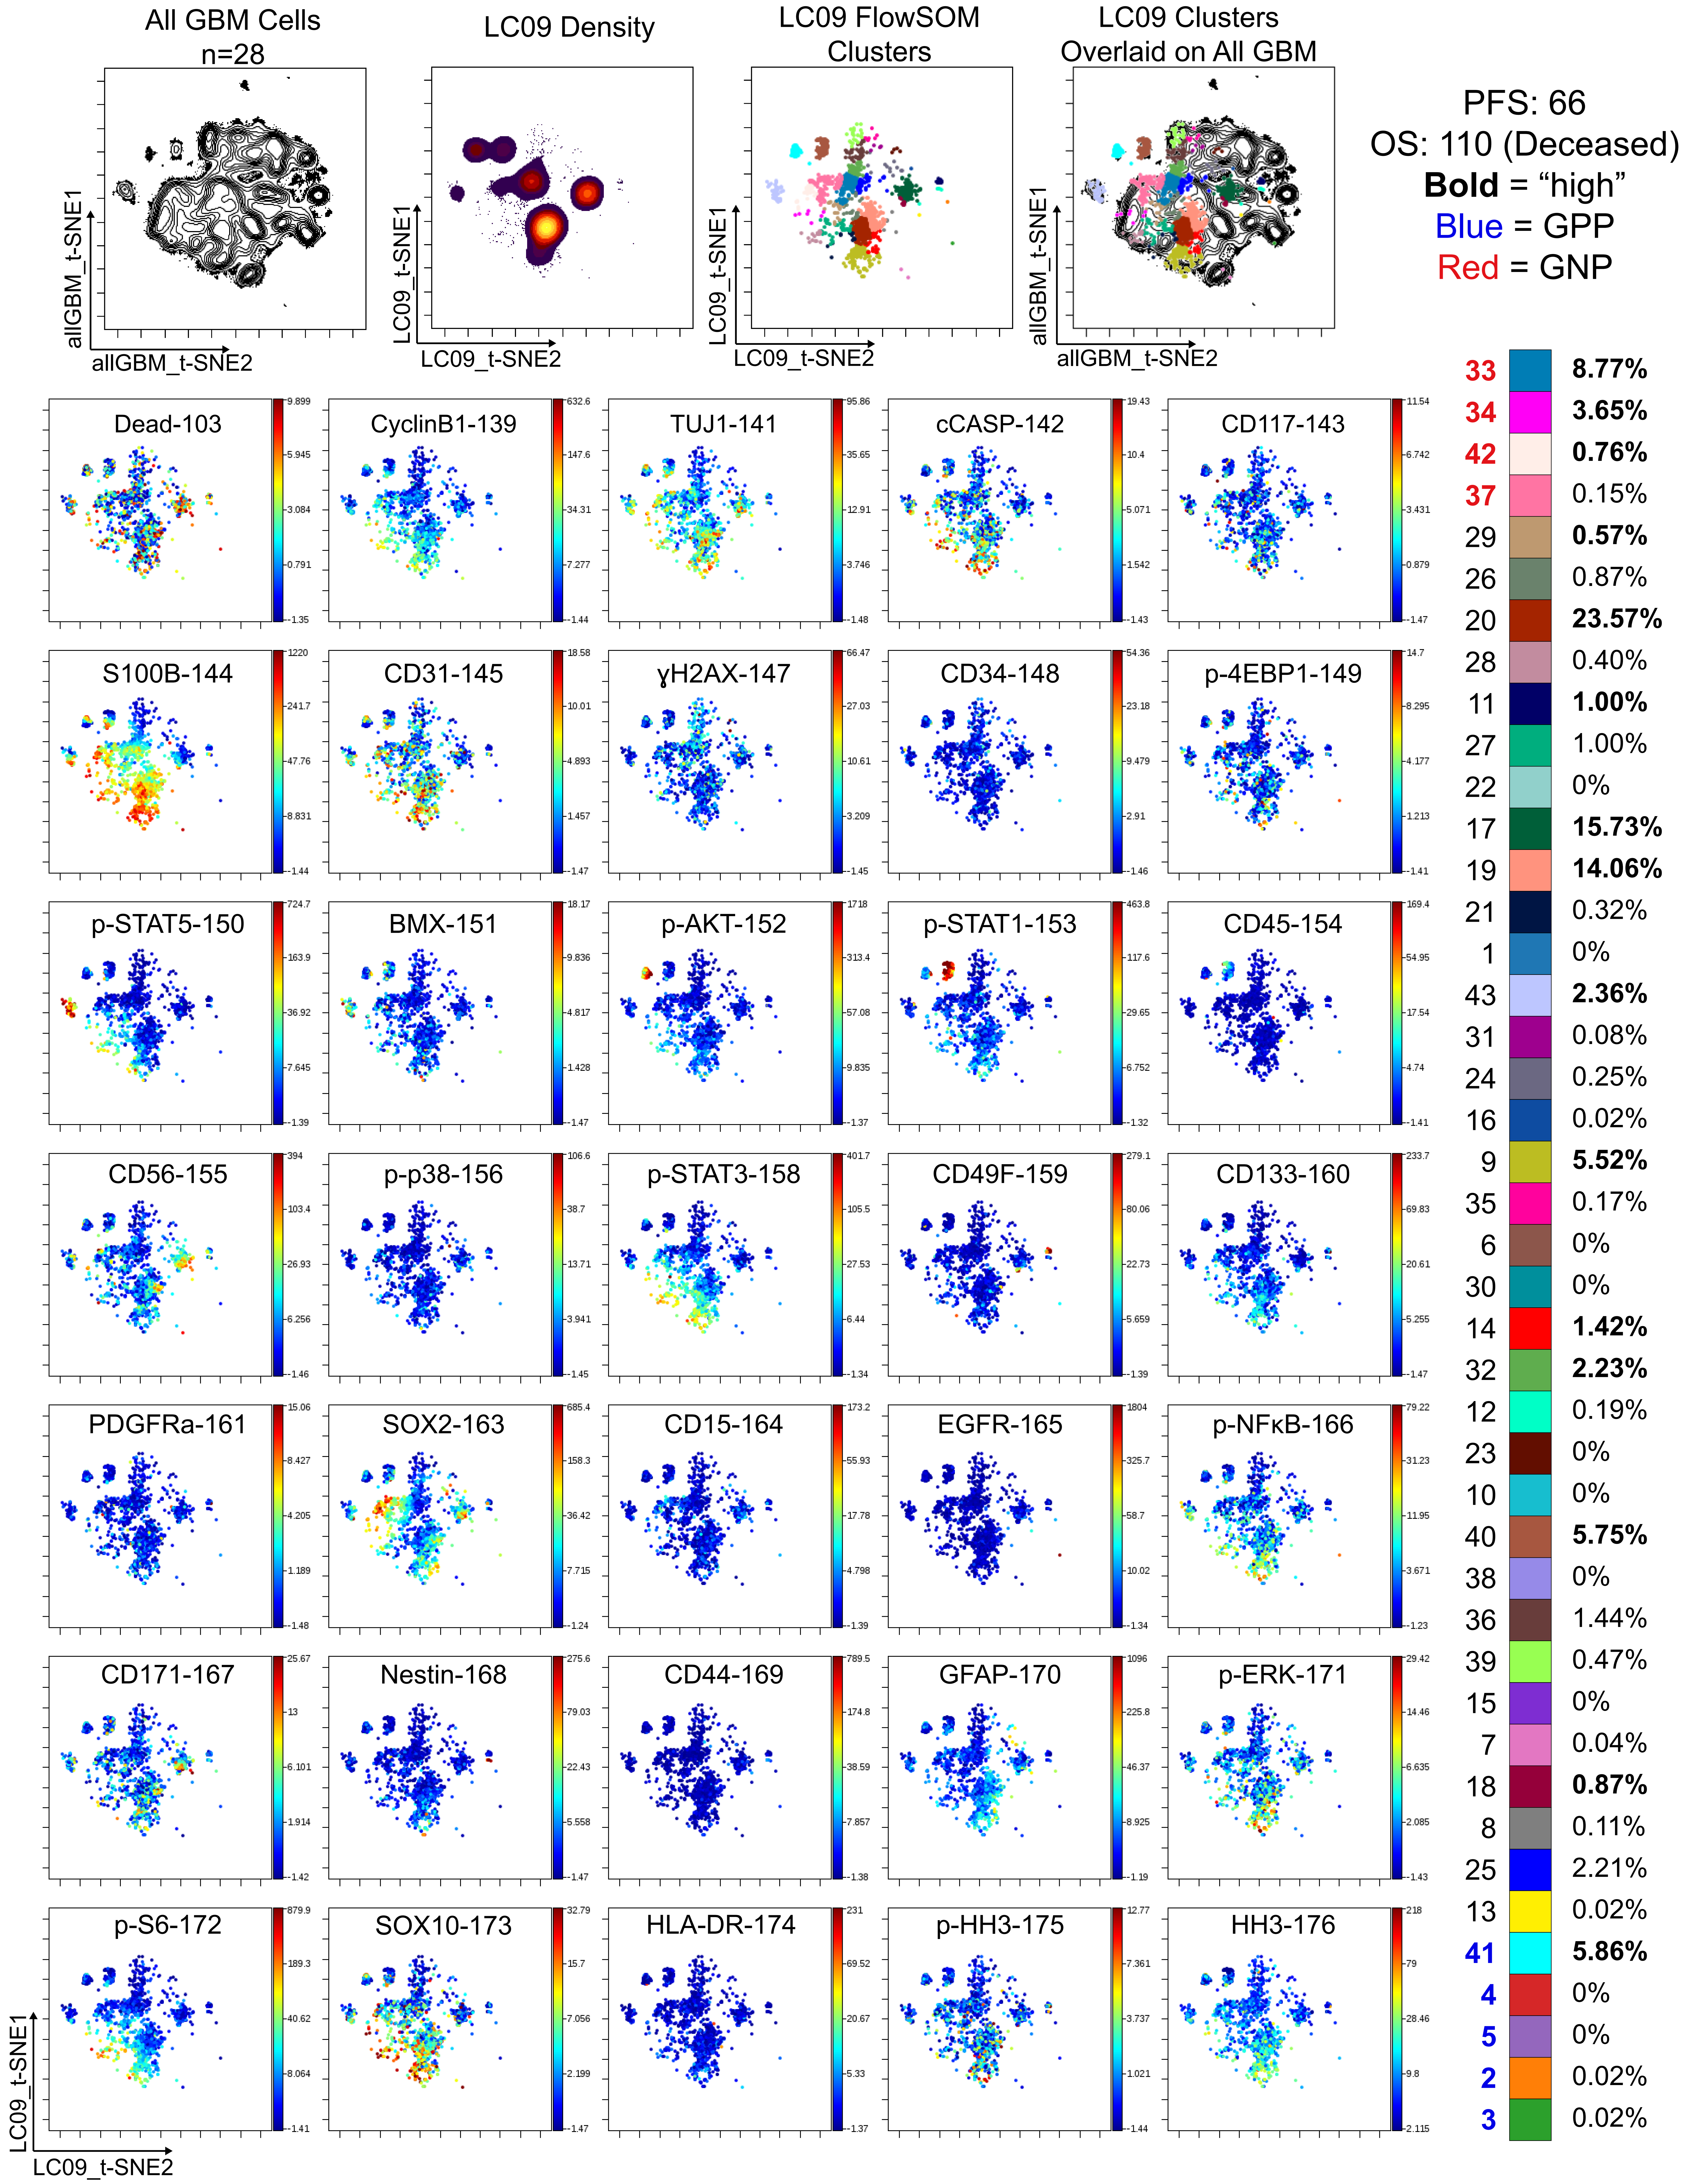



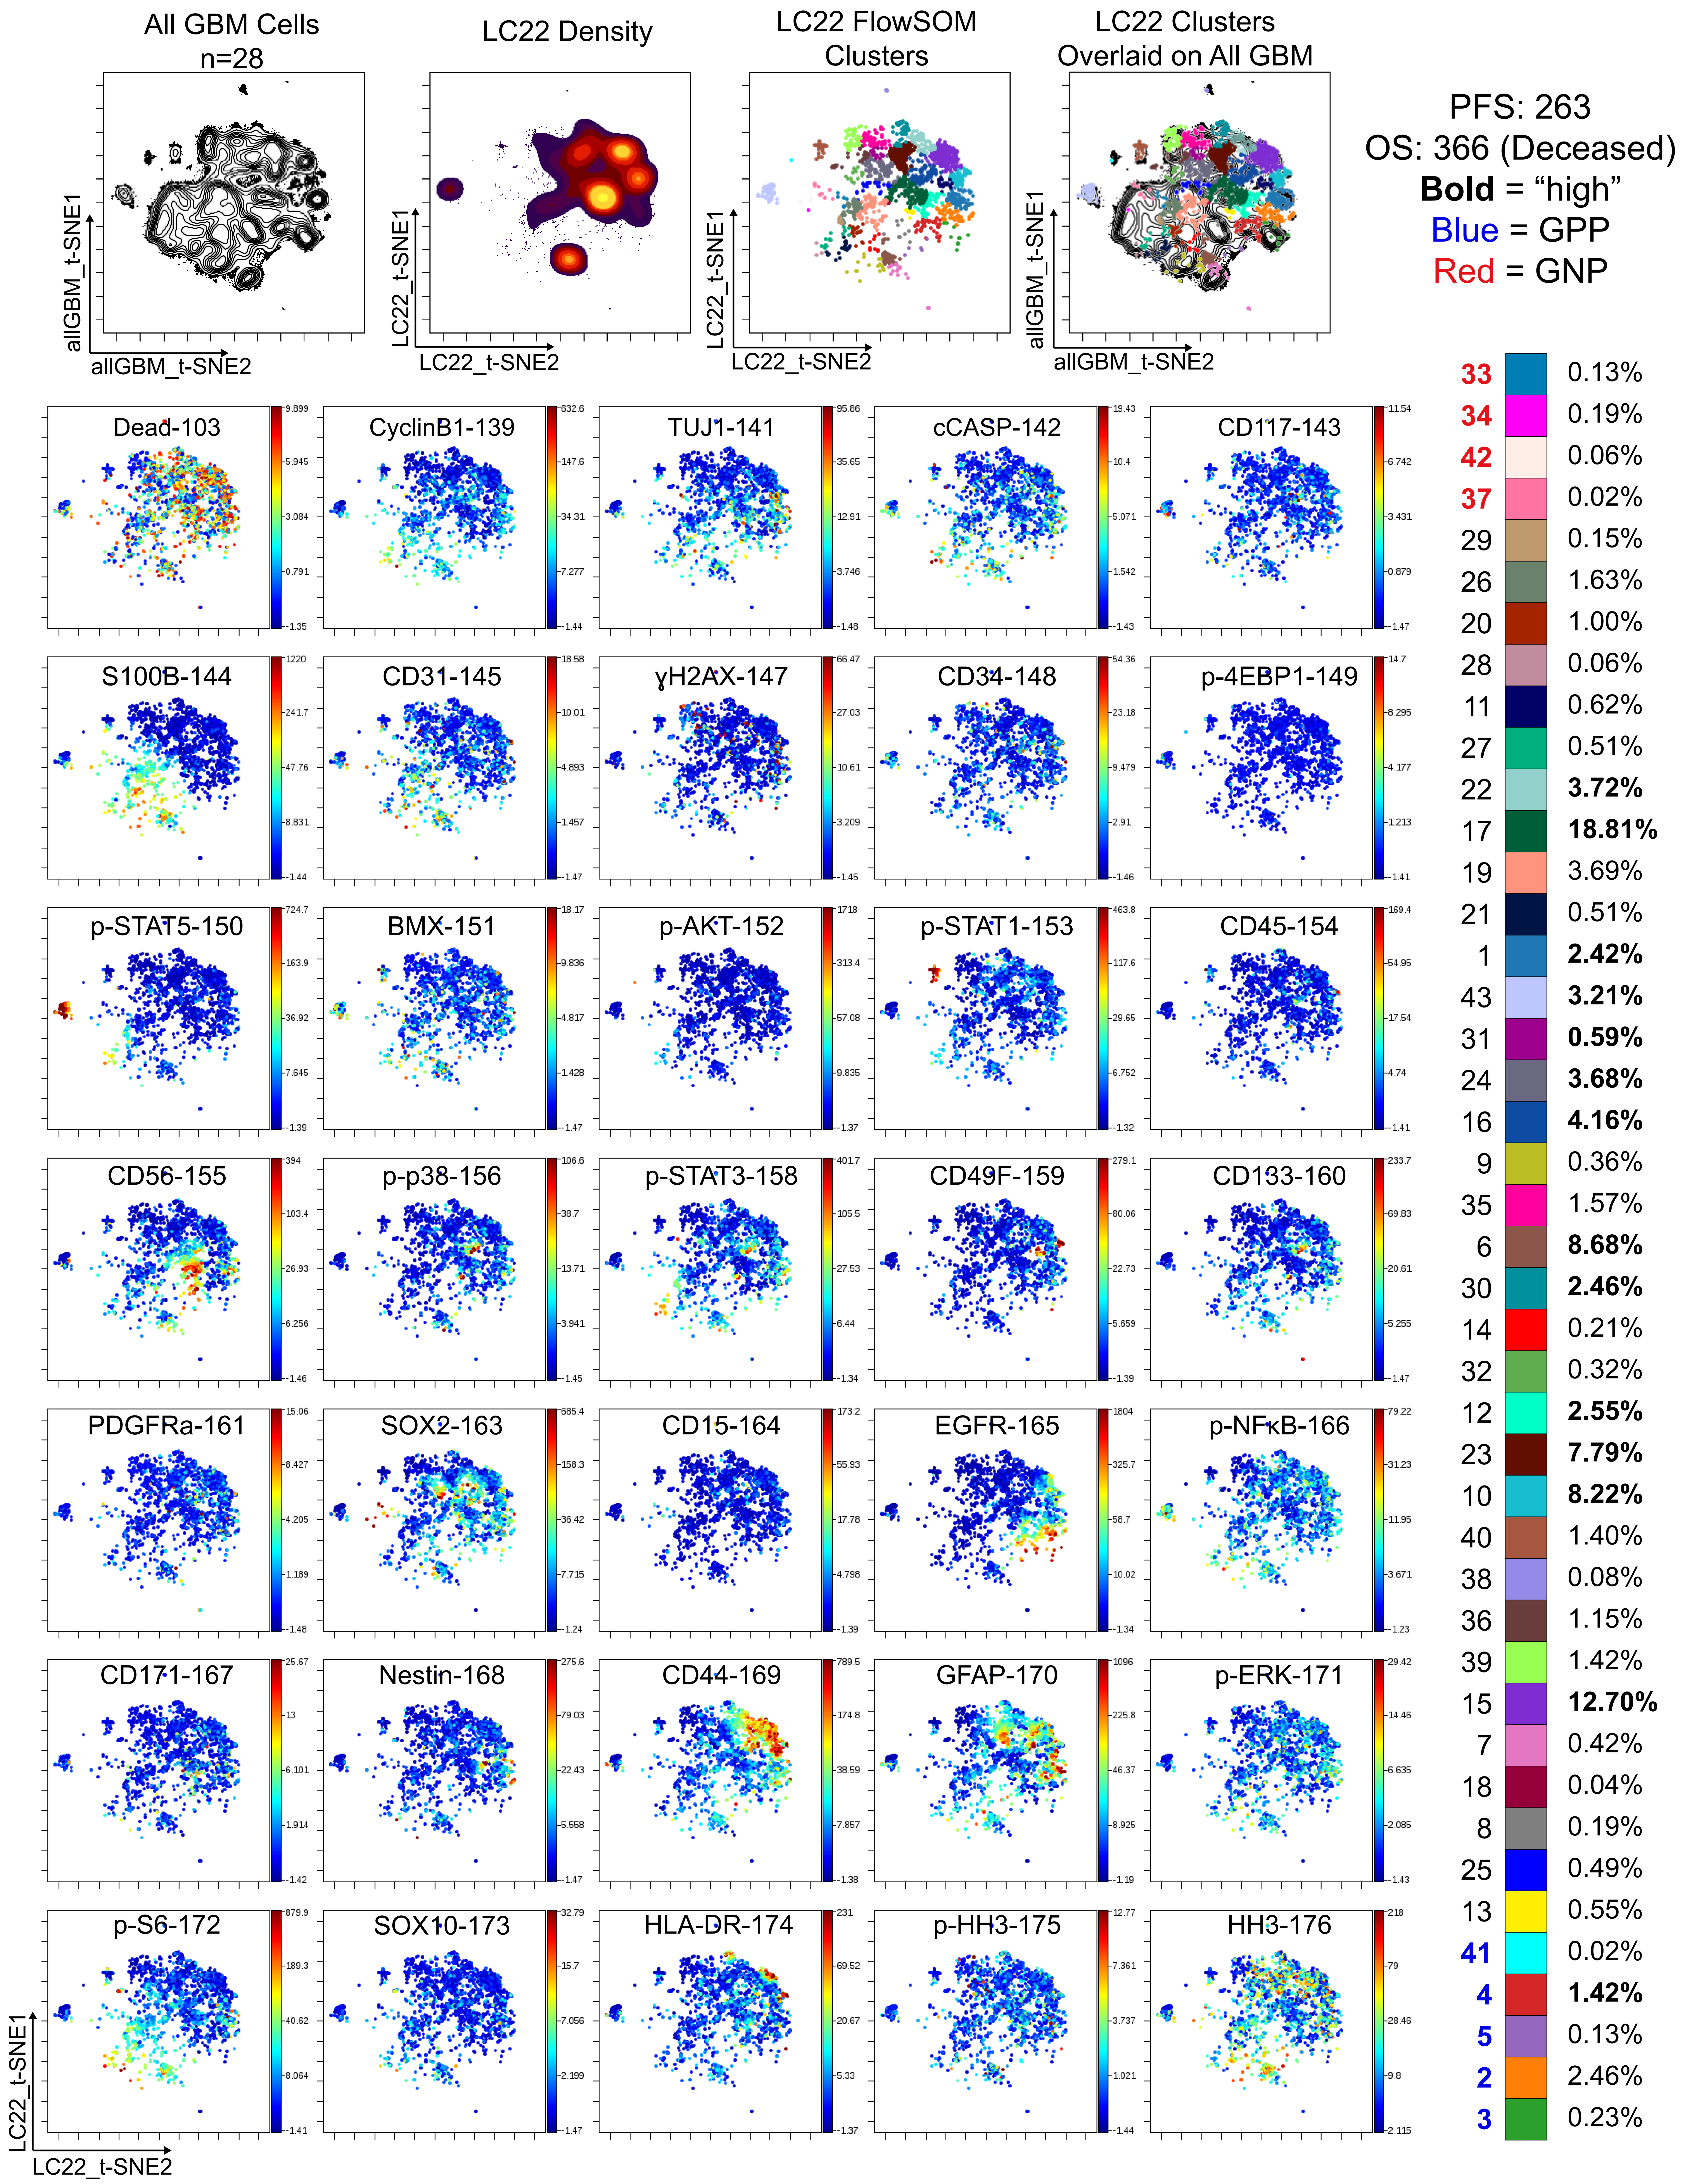



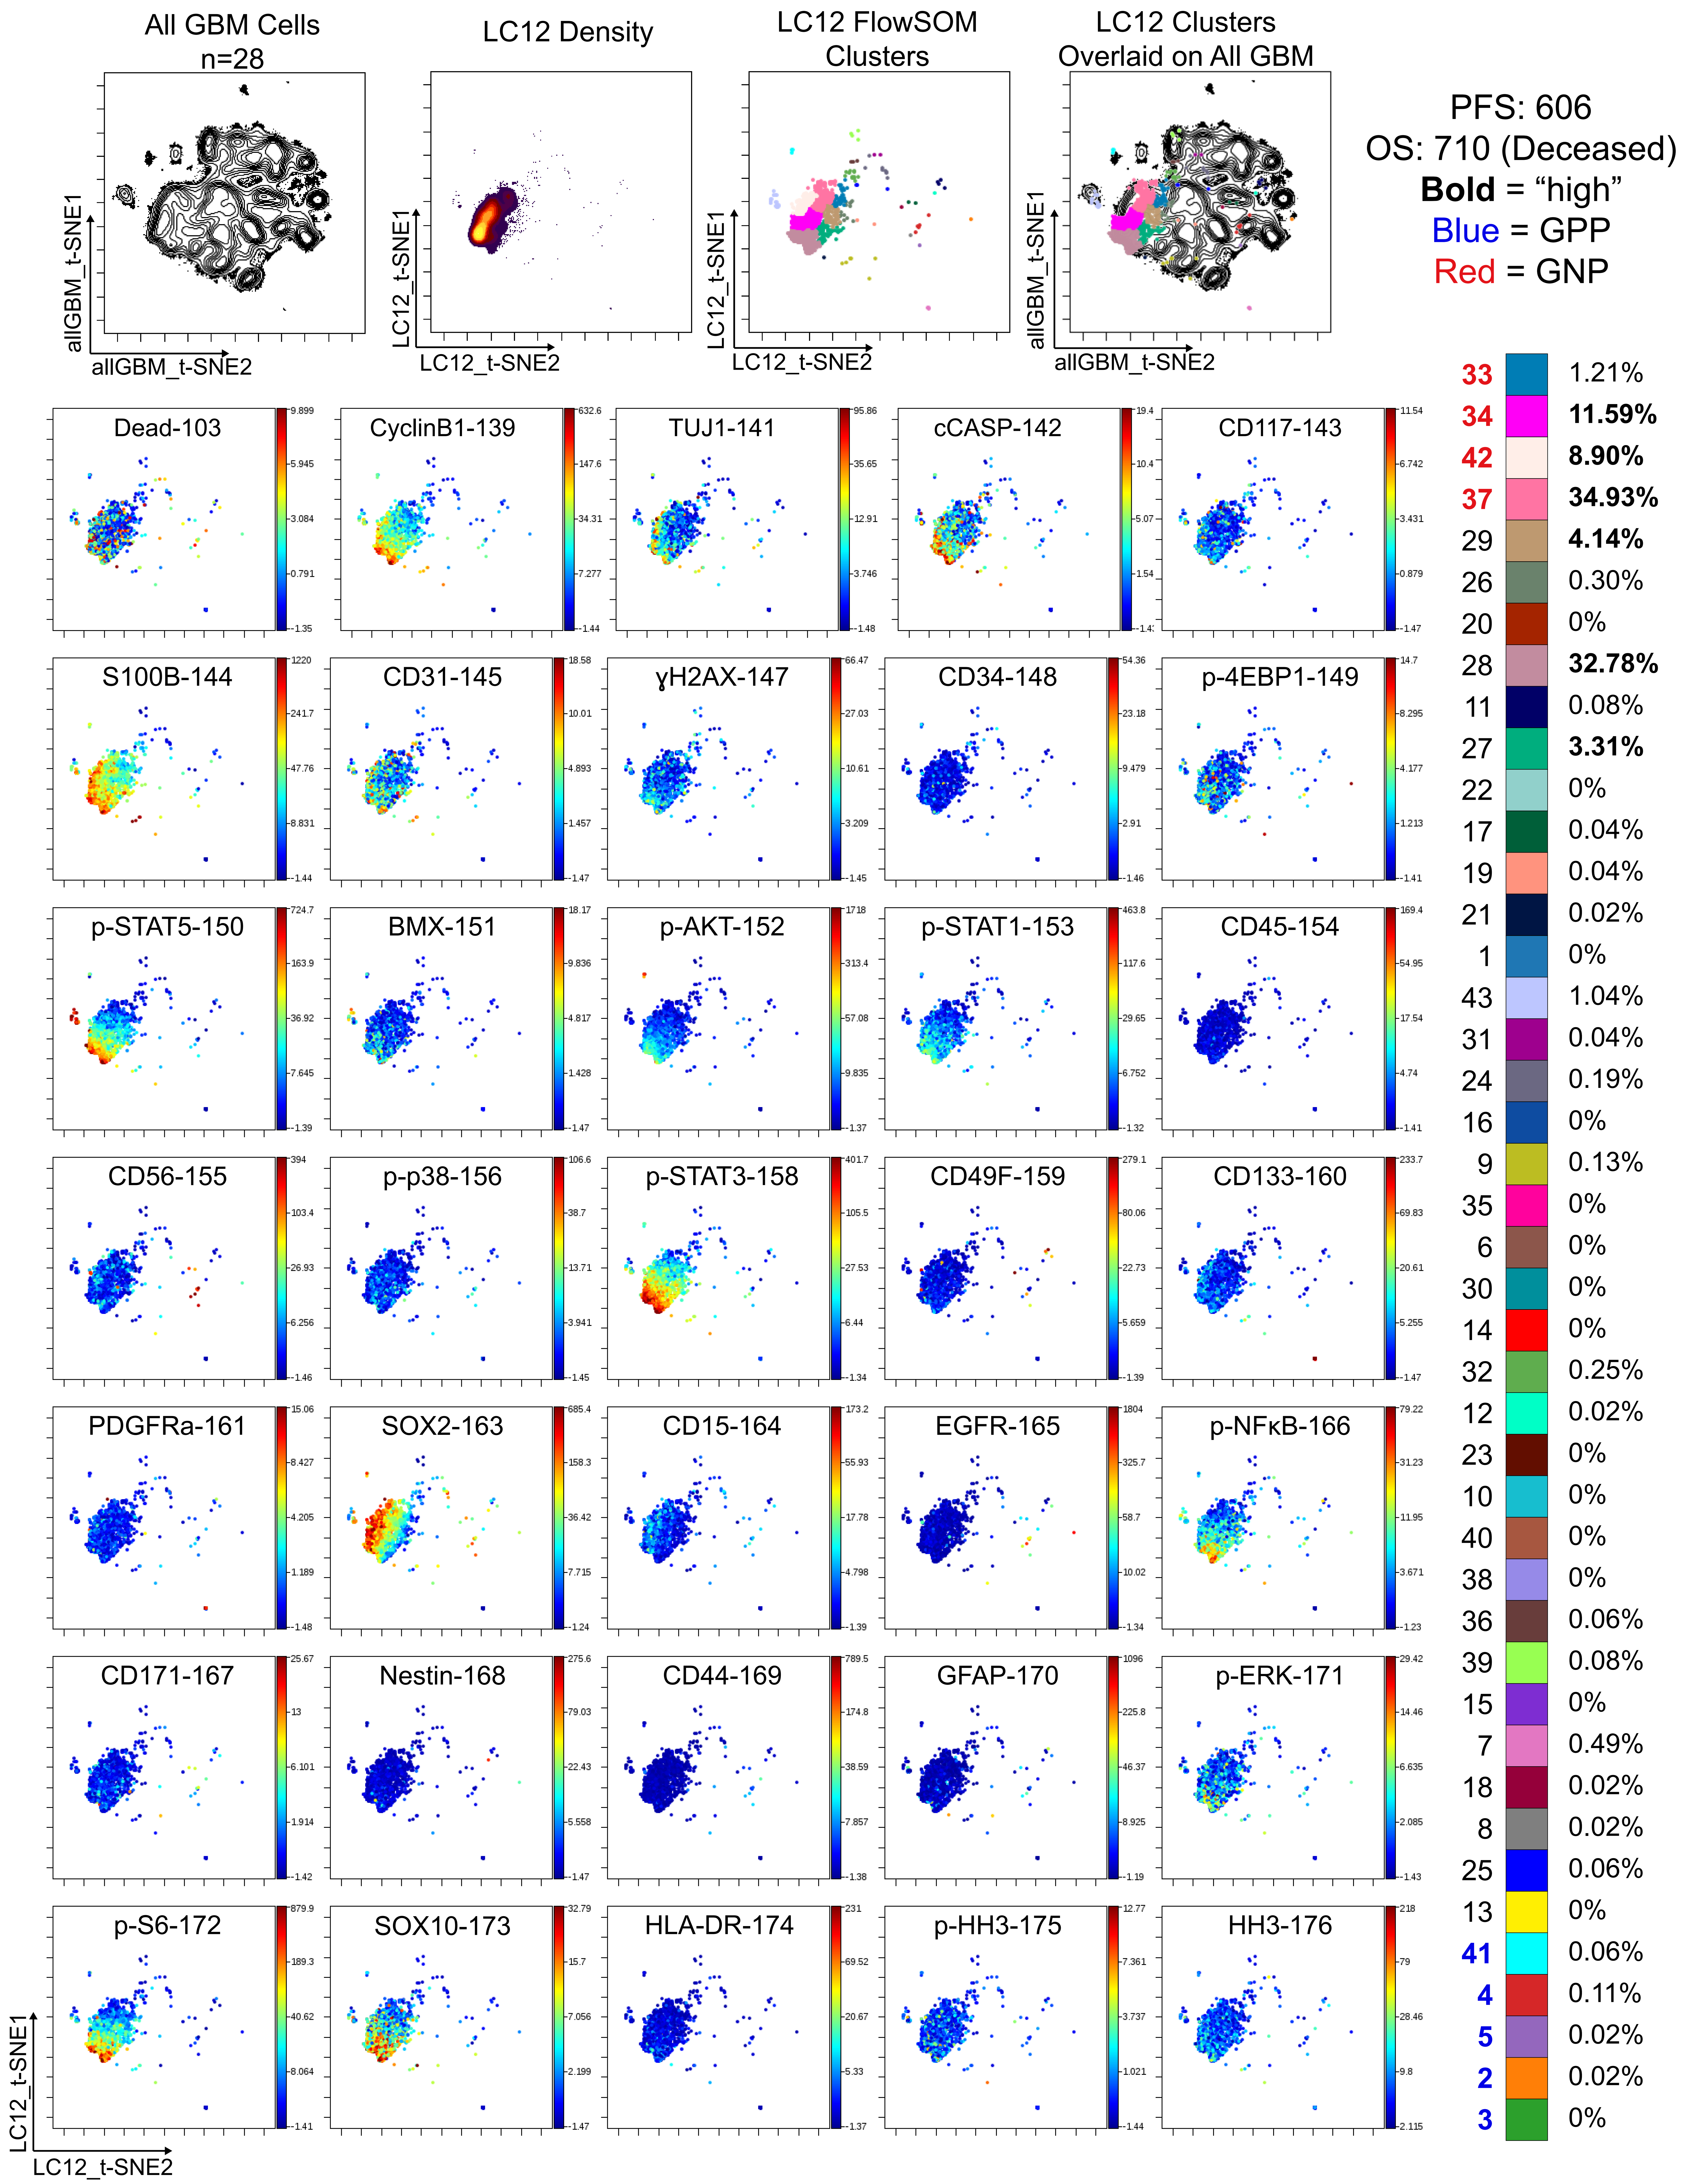

LC12\_t-SNE1

LC12\_t-SNE2



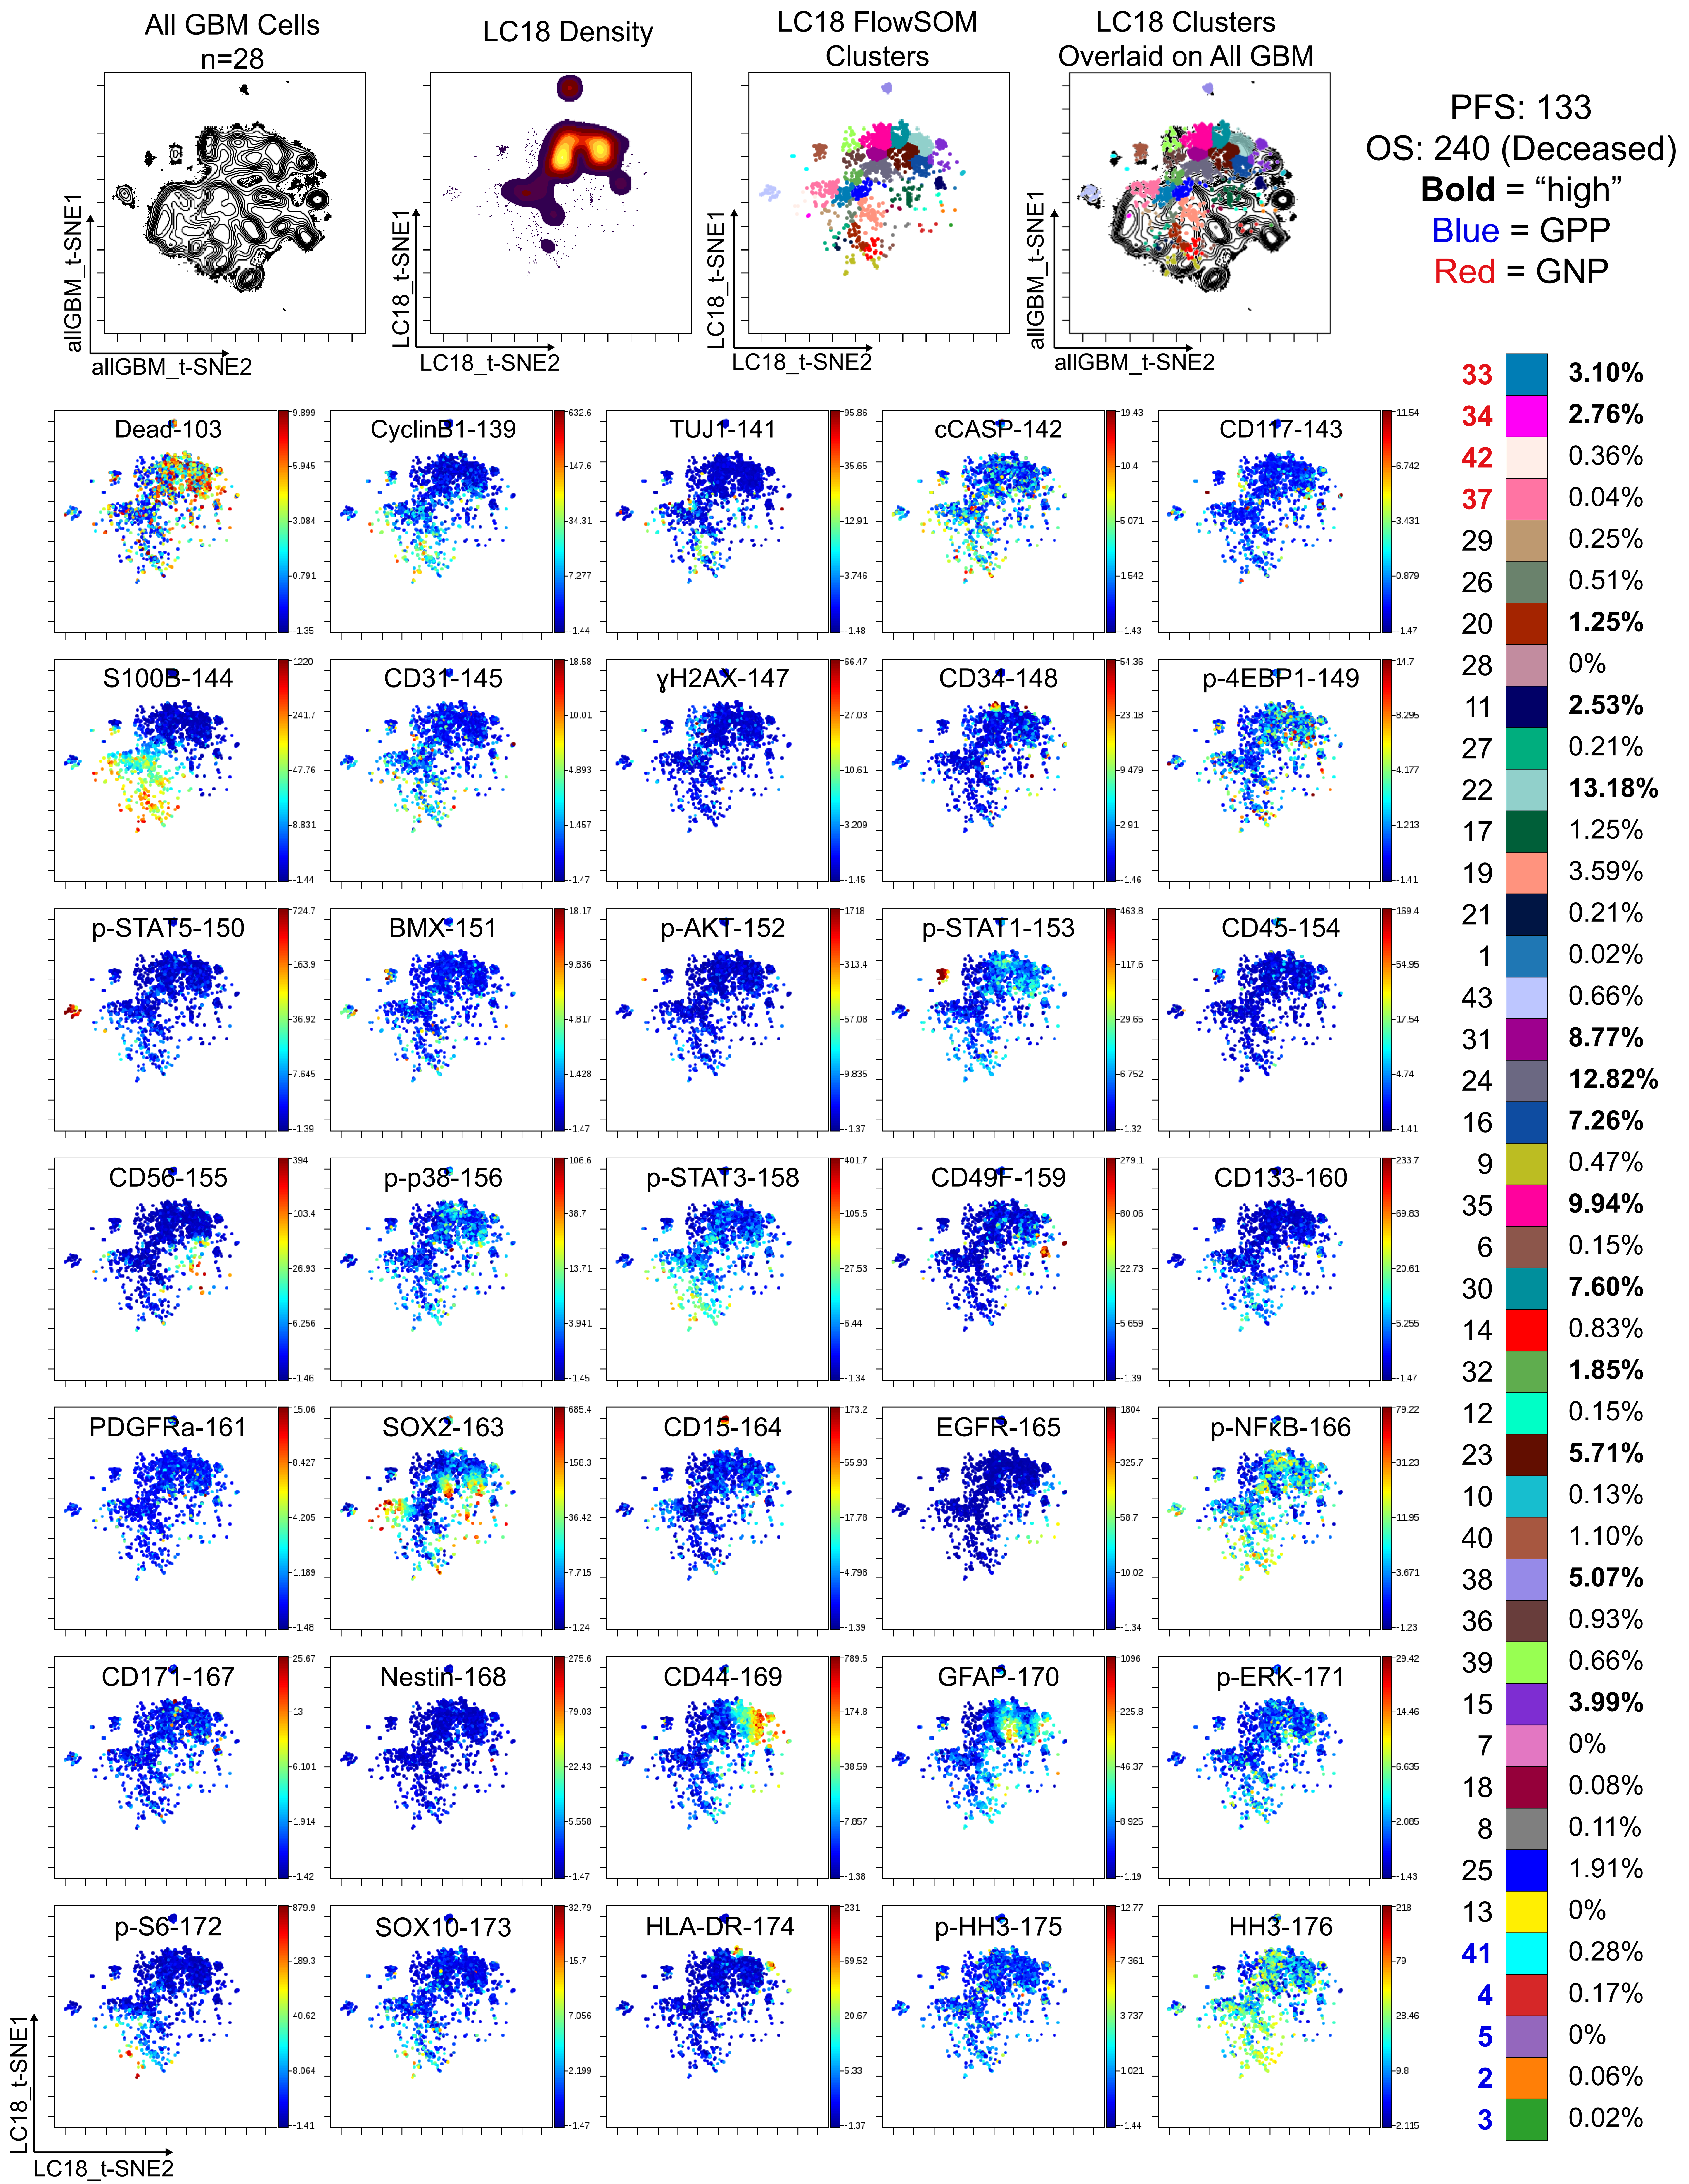



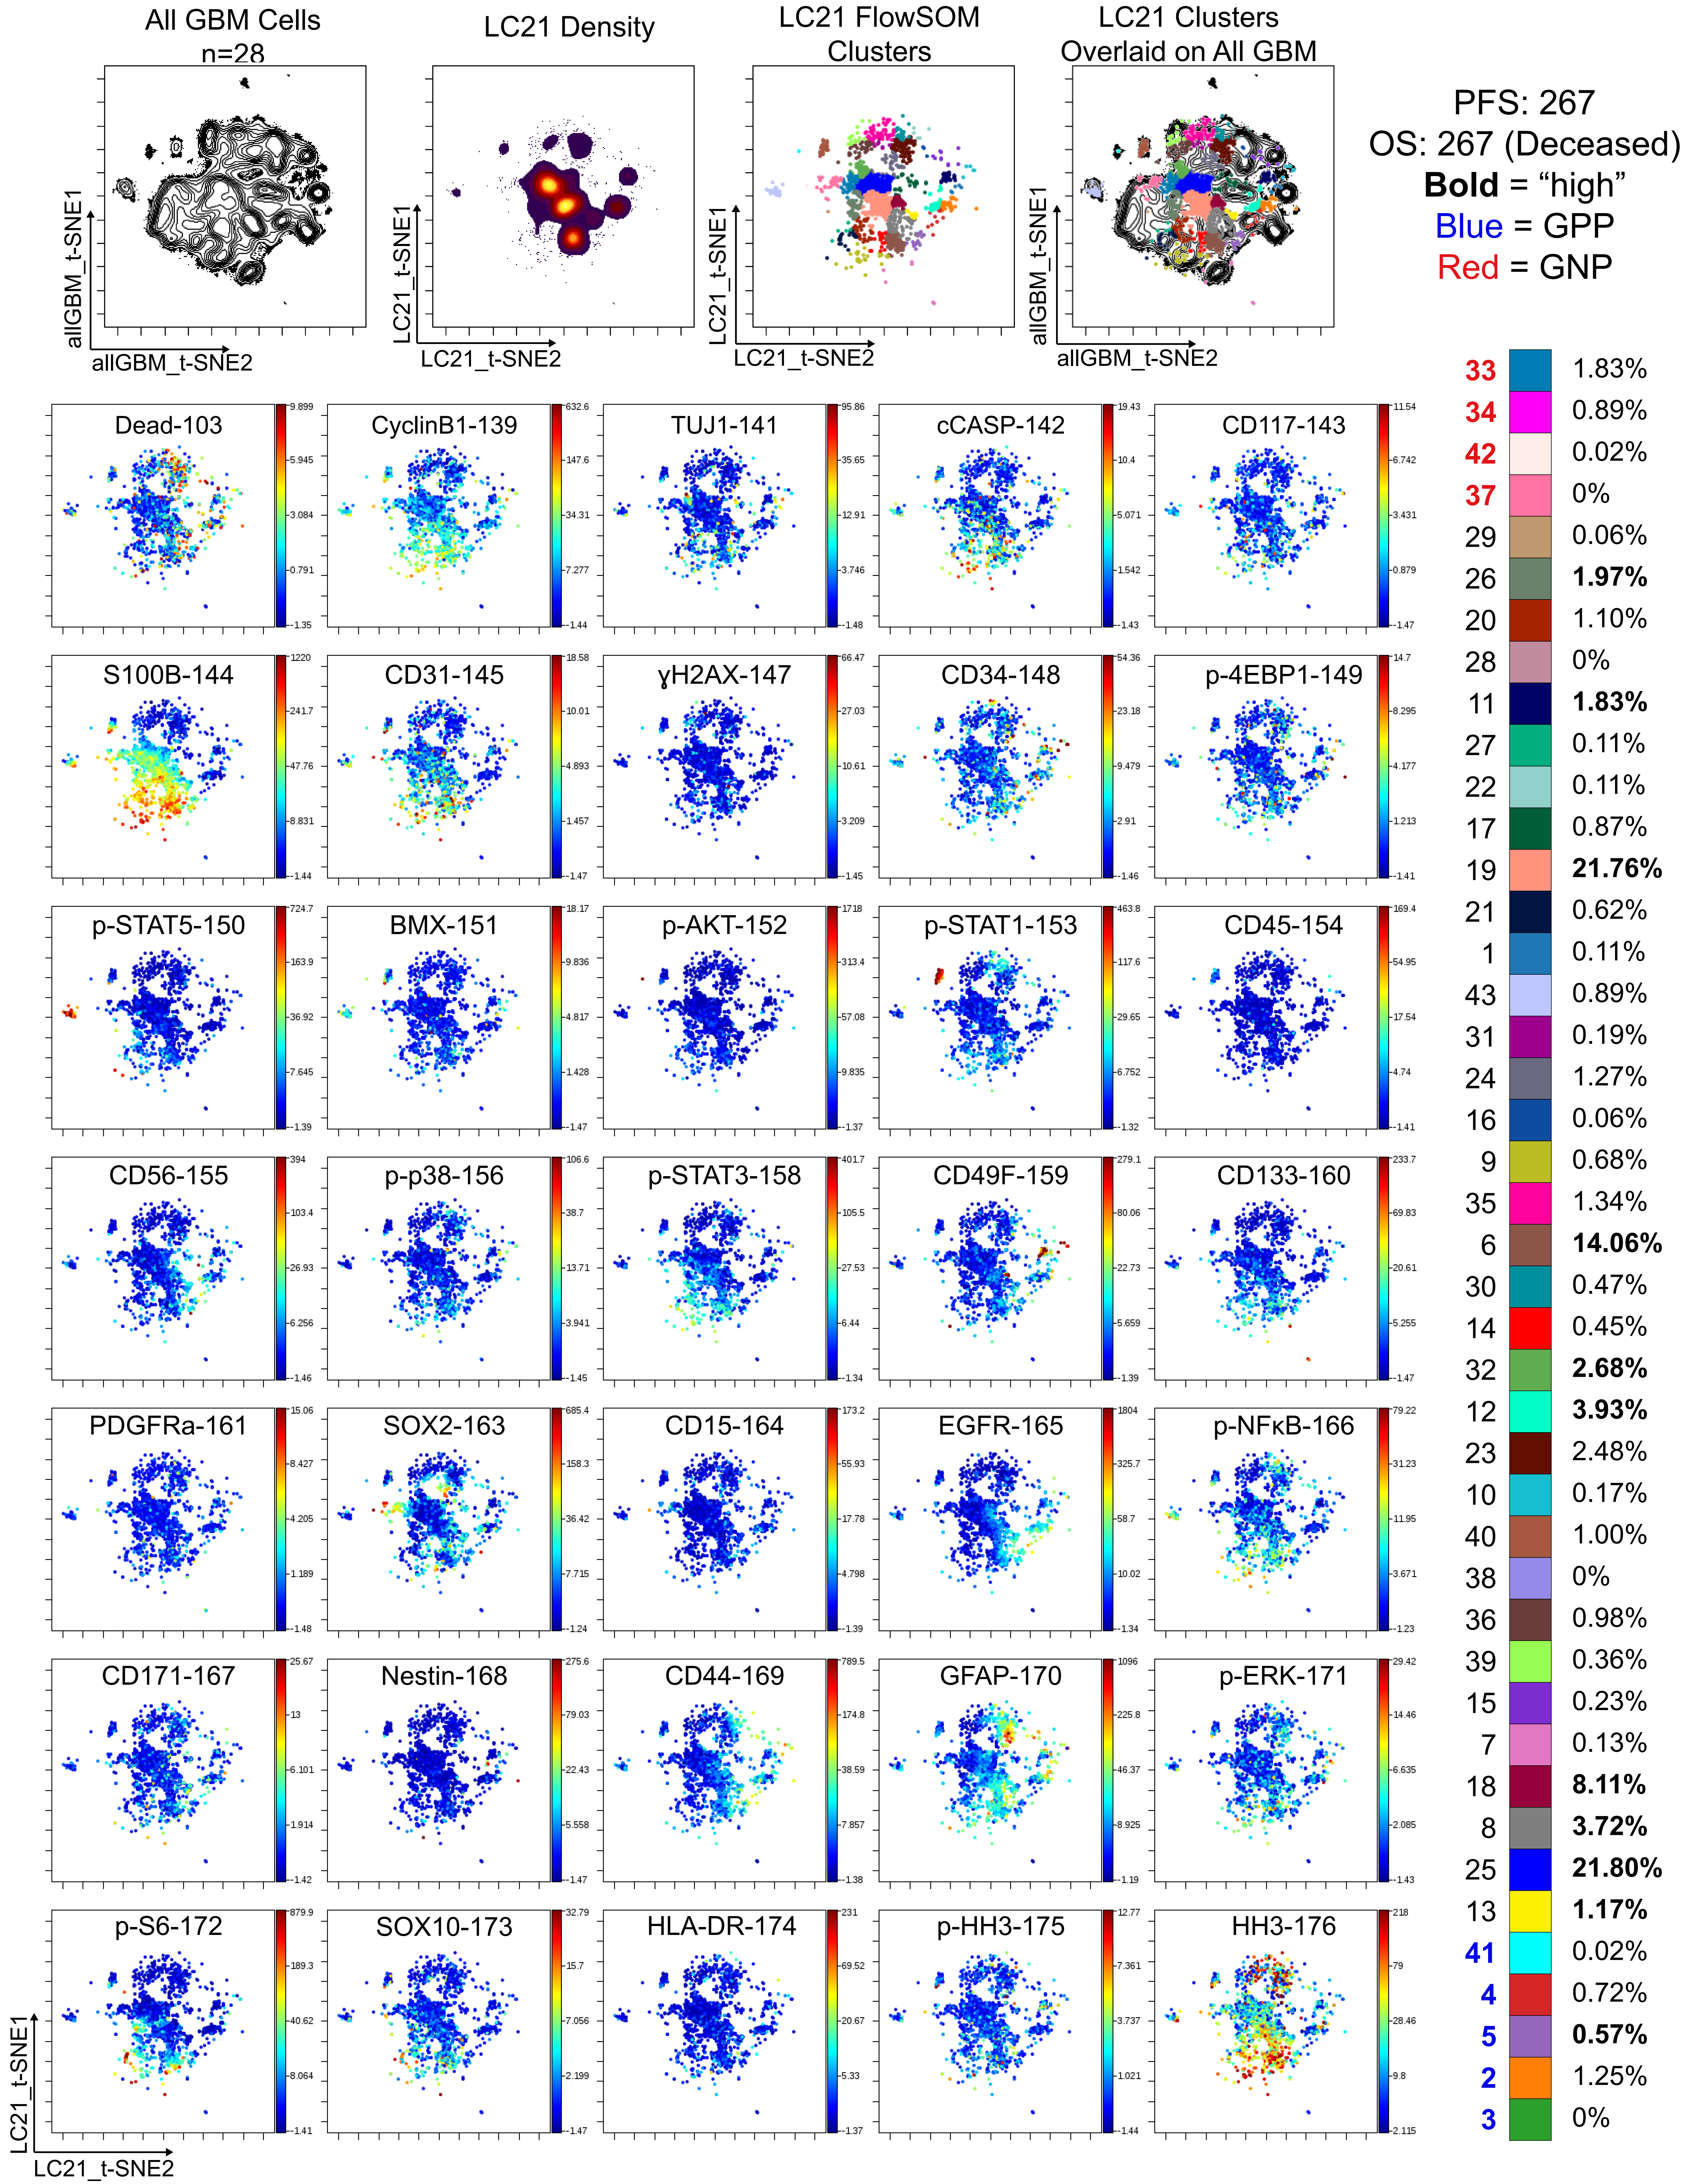



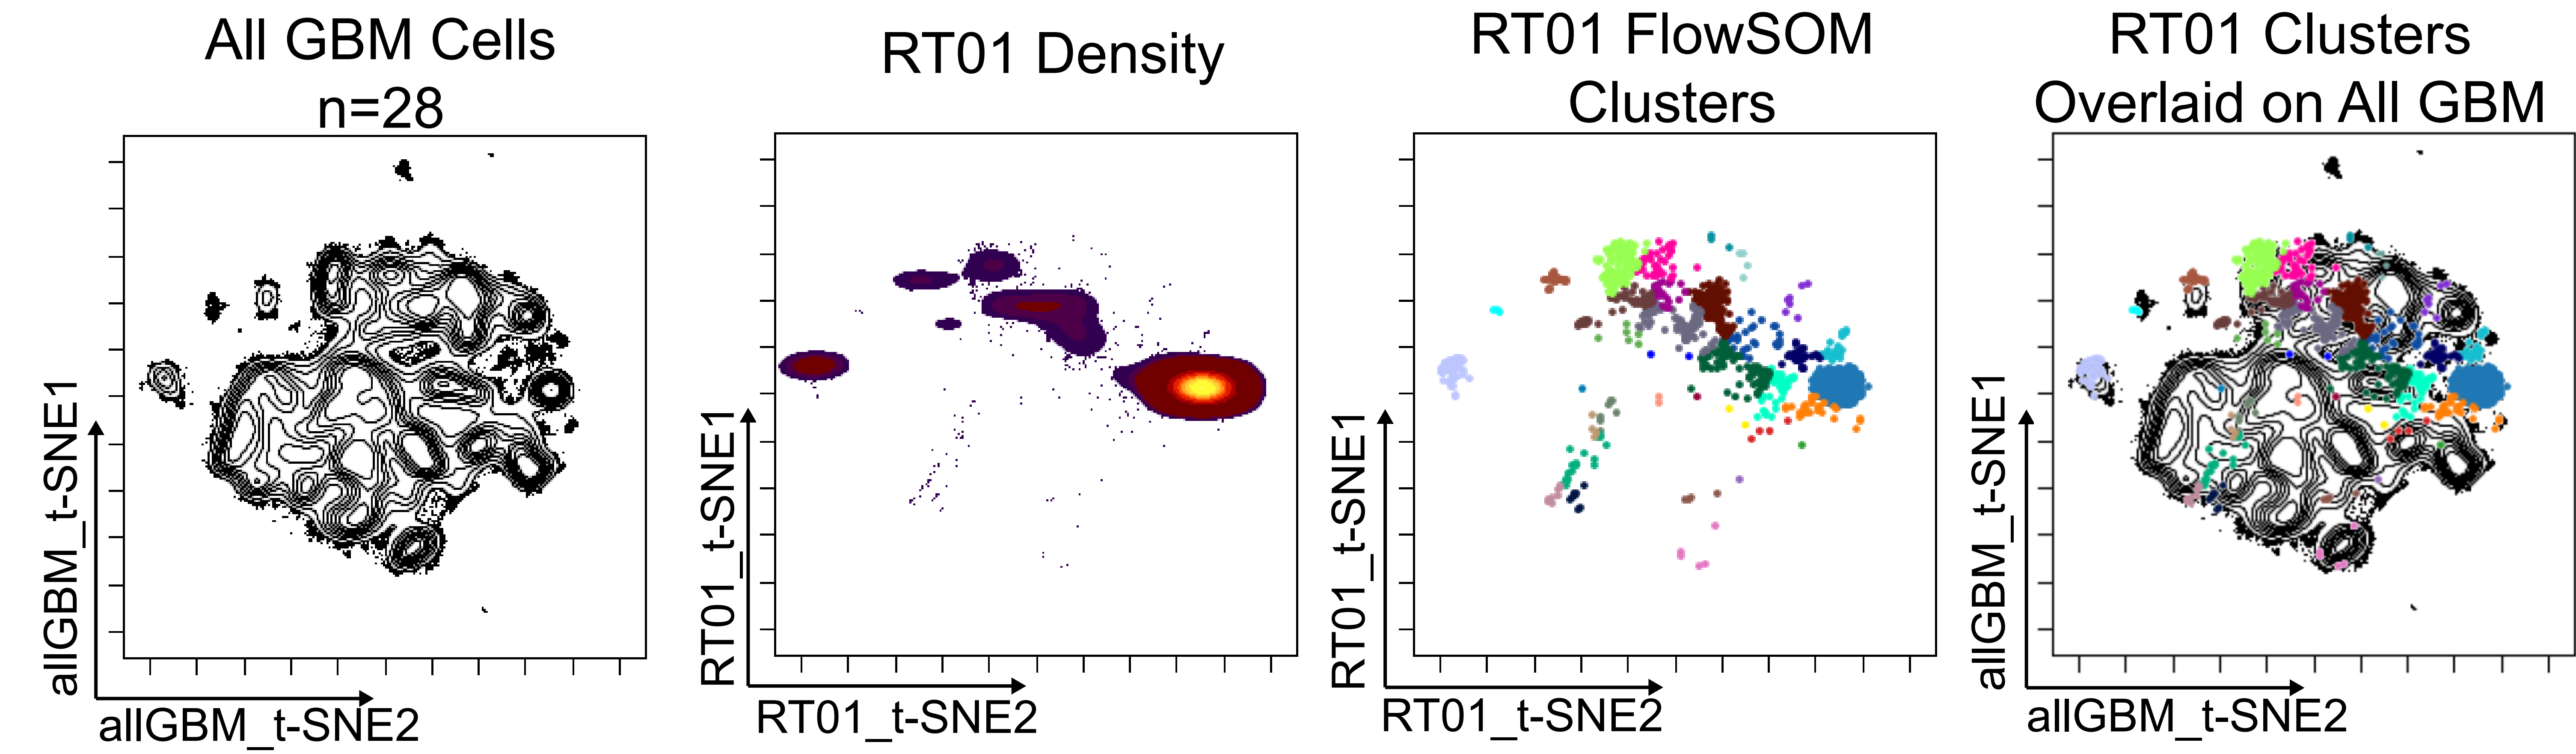

PFS: 162  
OS: 198 (Deceased)  
**Blue** = “high”  
**Blue** = GPP  
**Red** = GNP

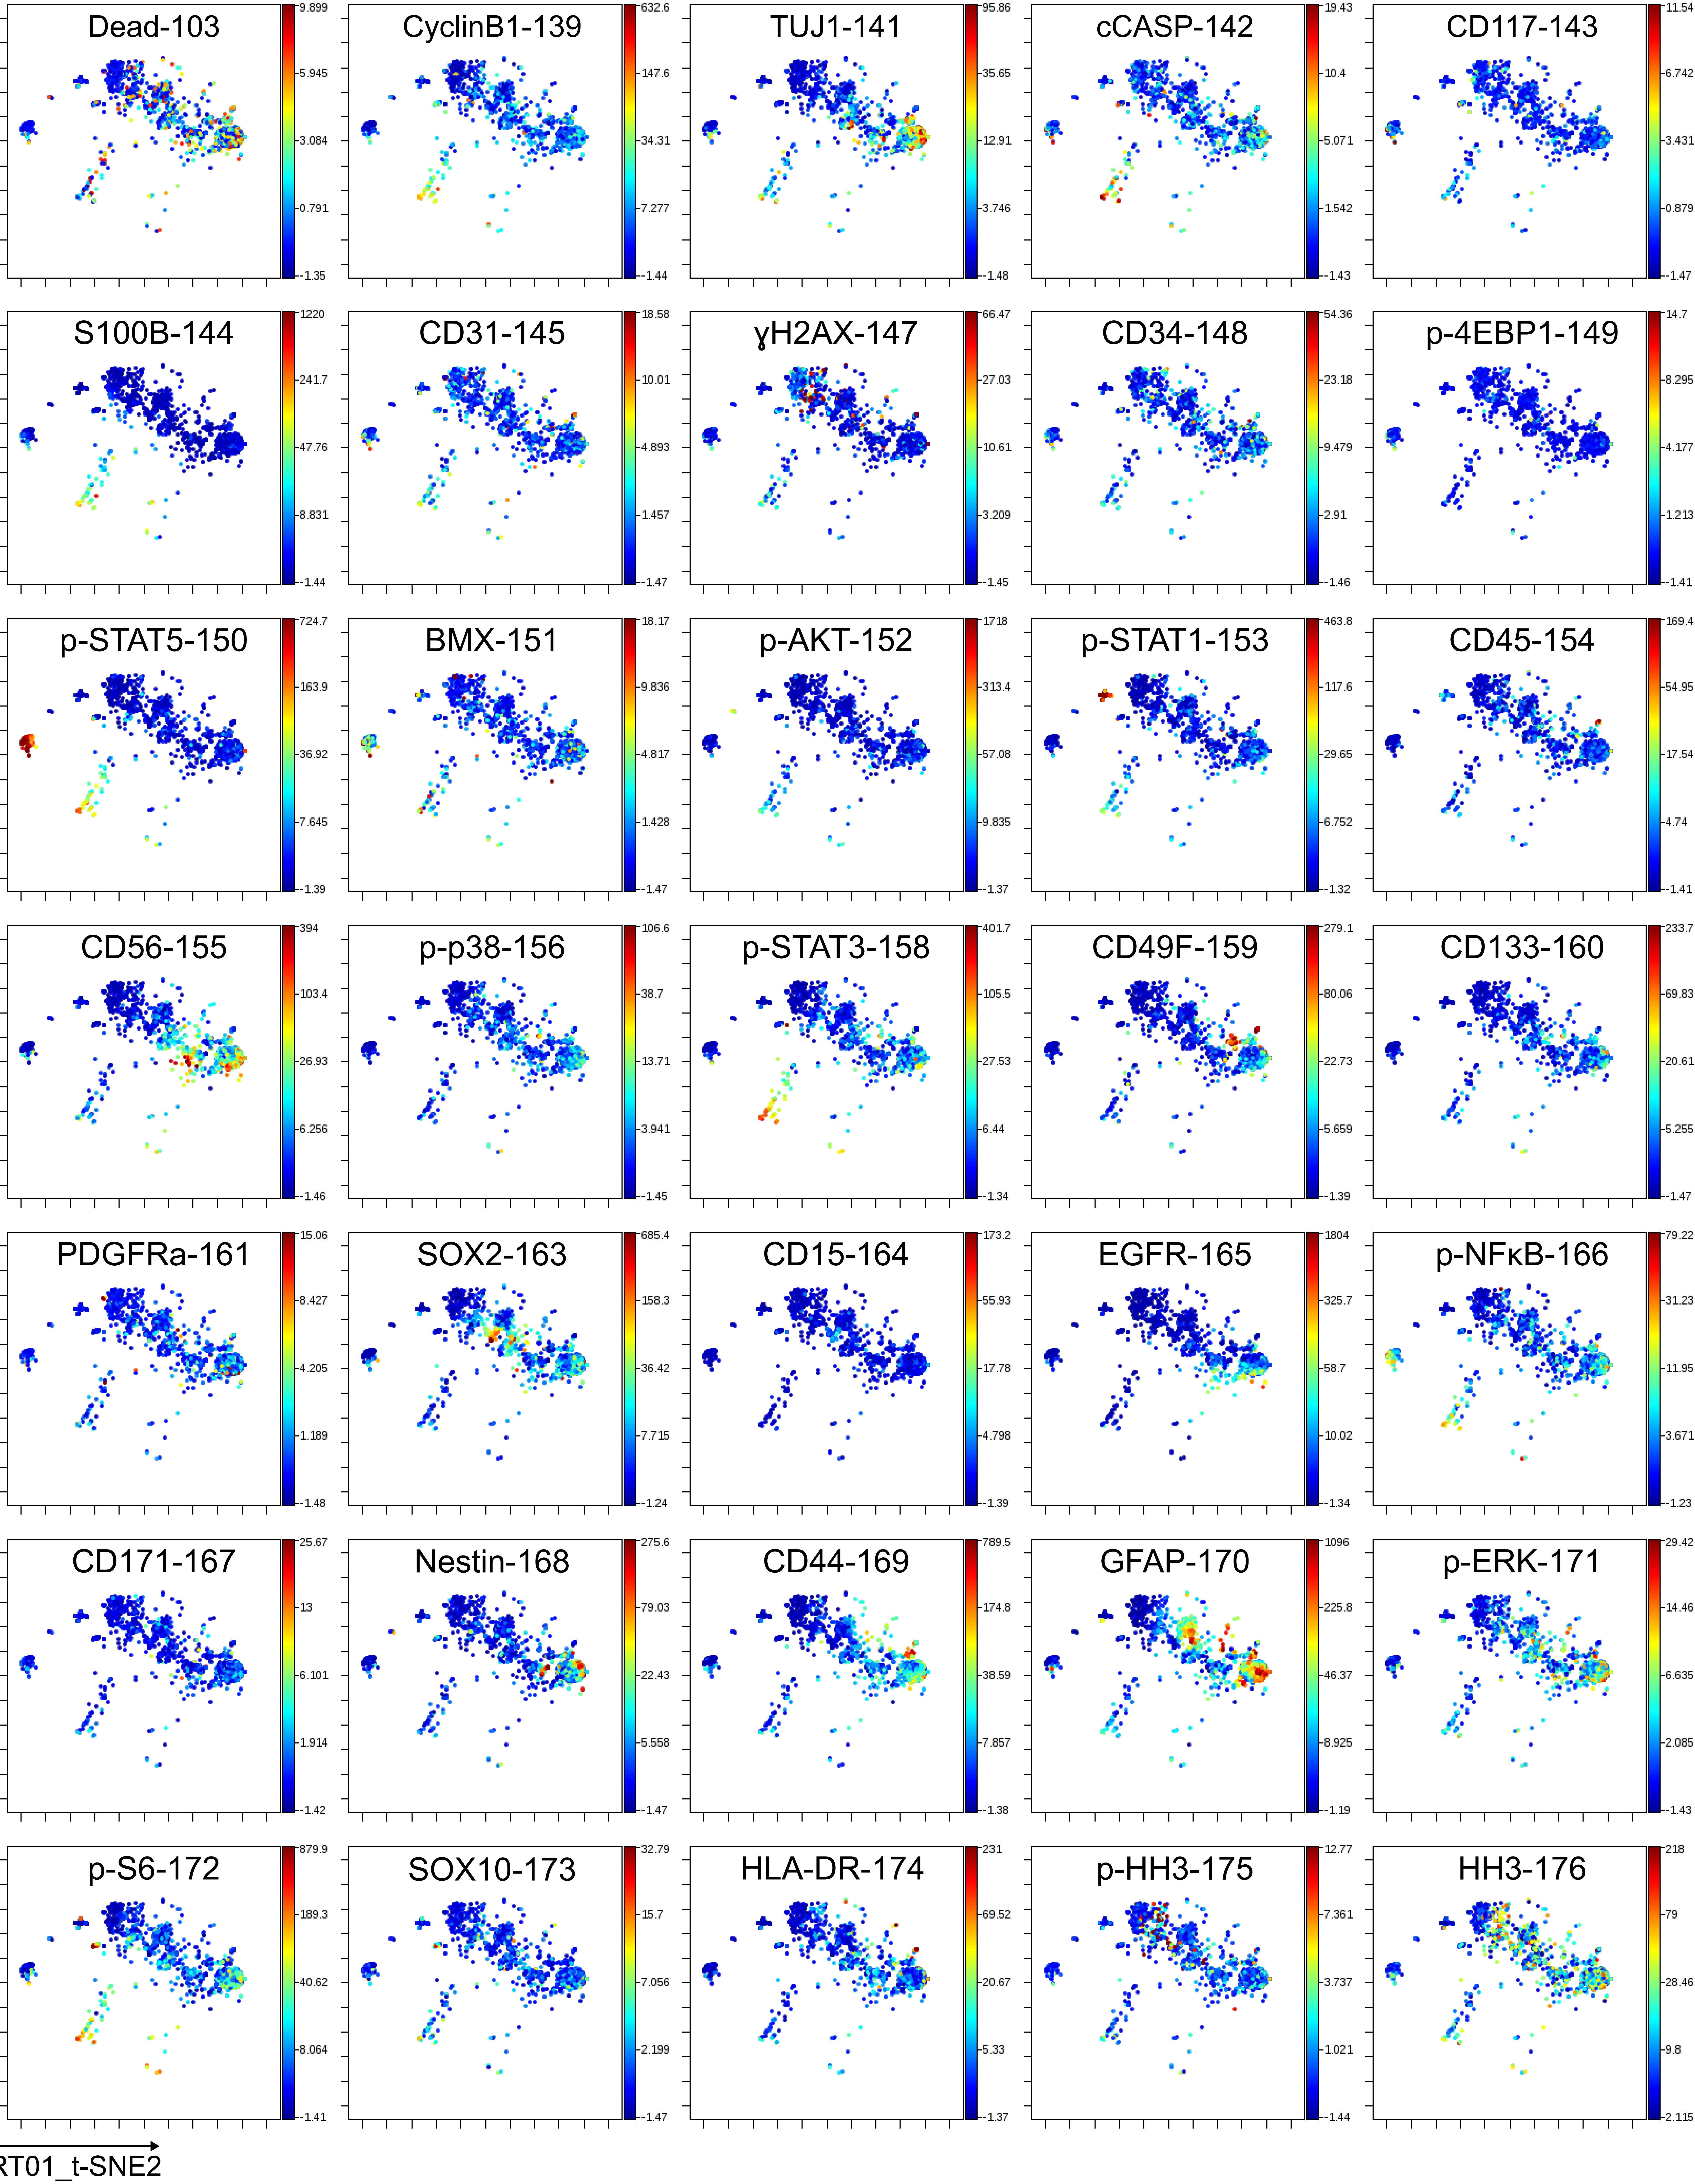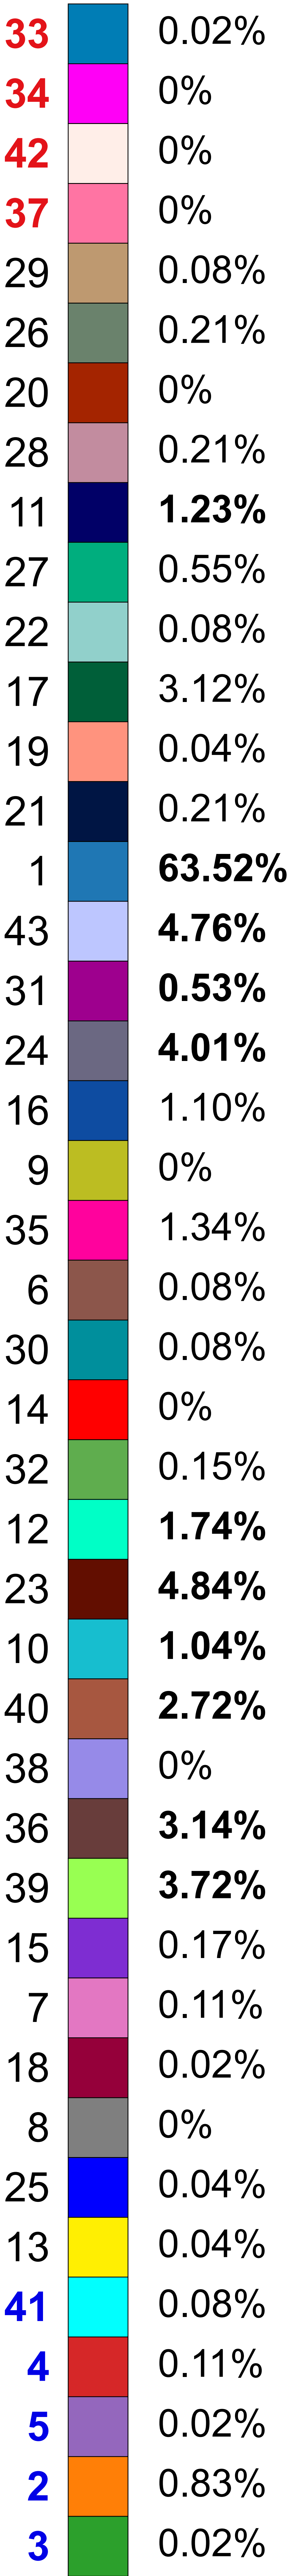



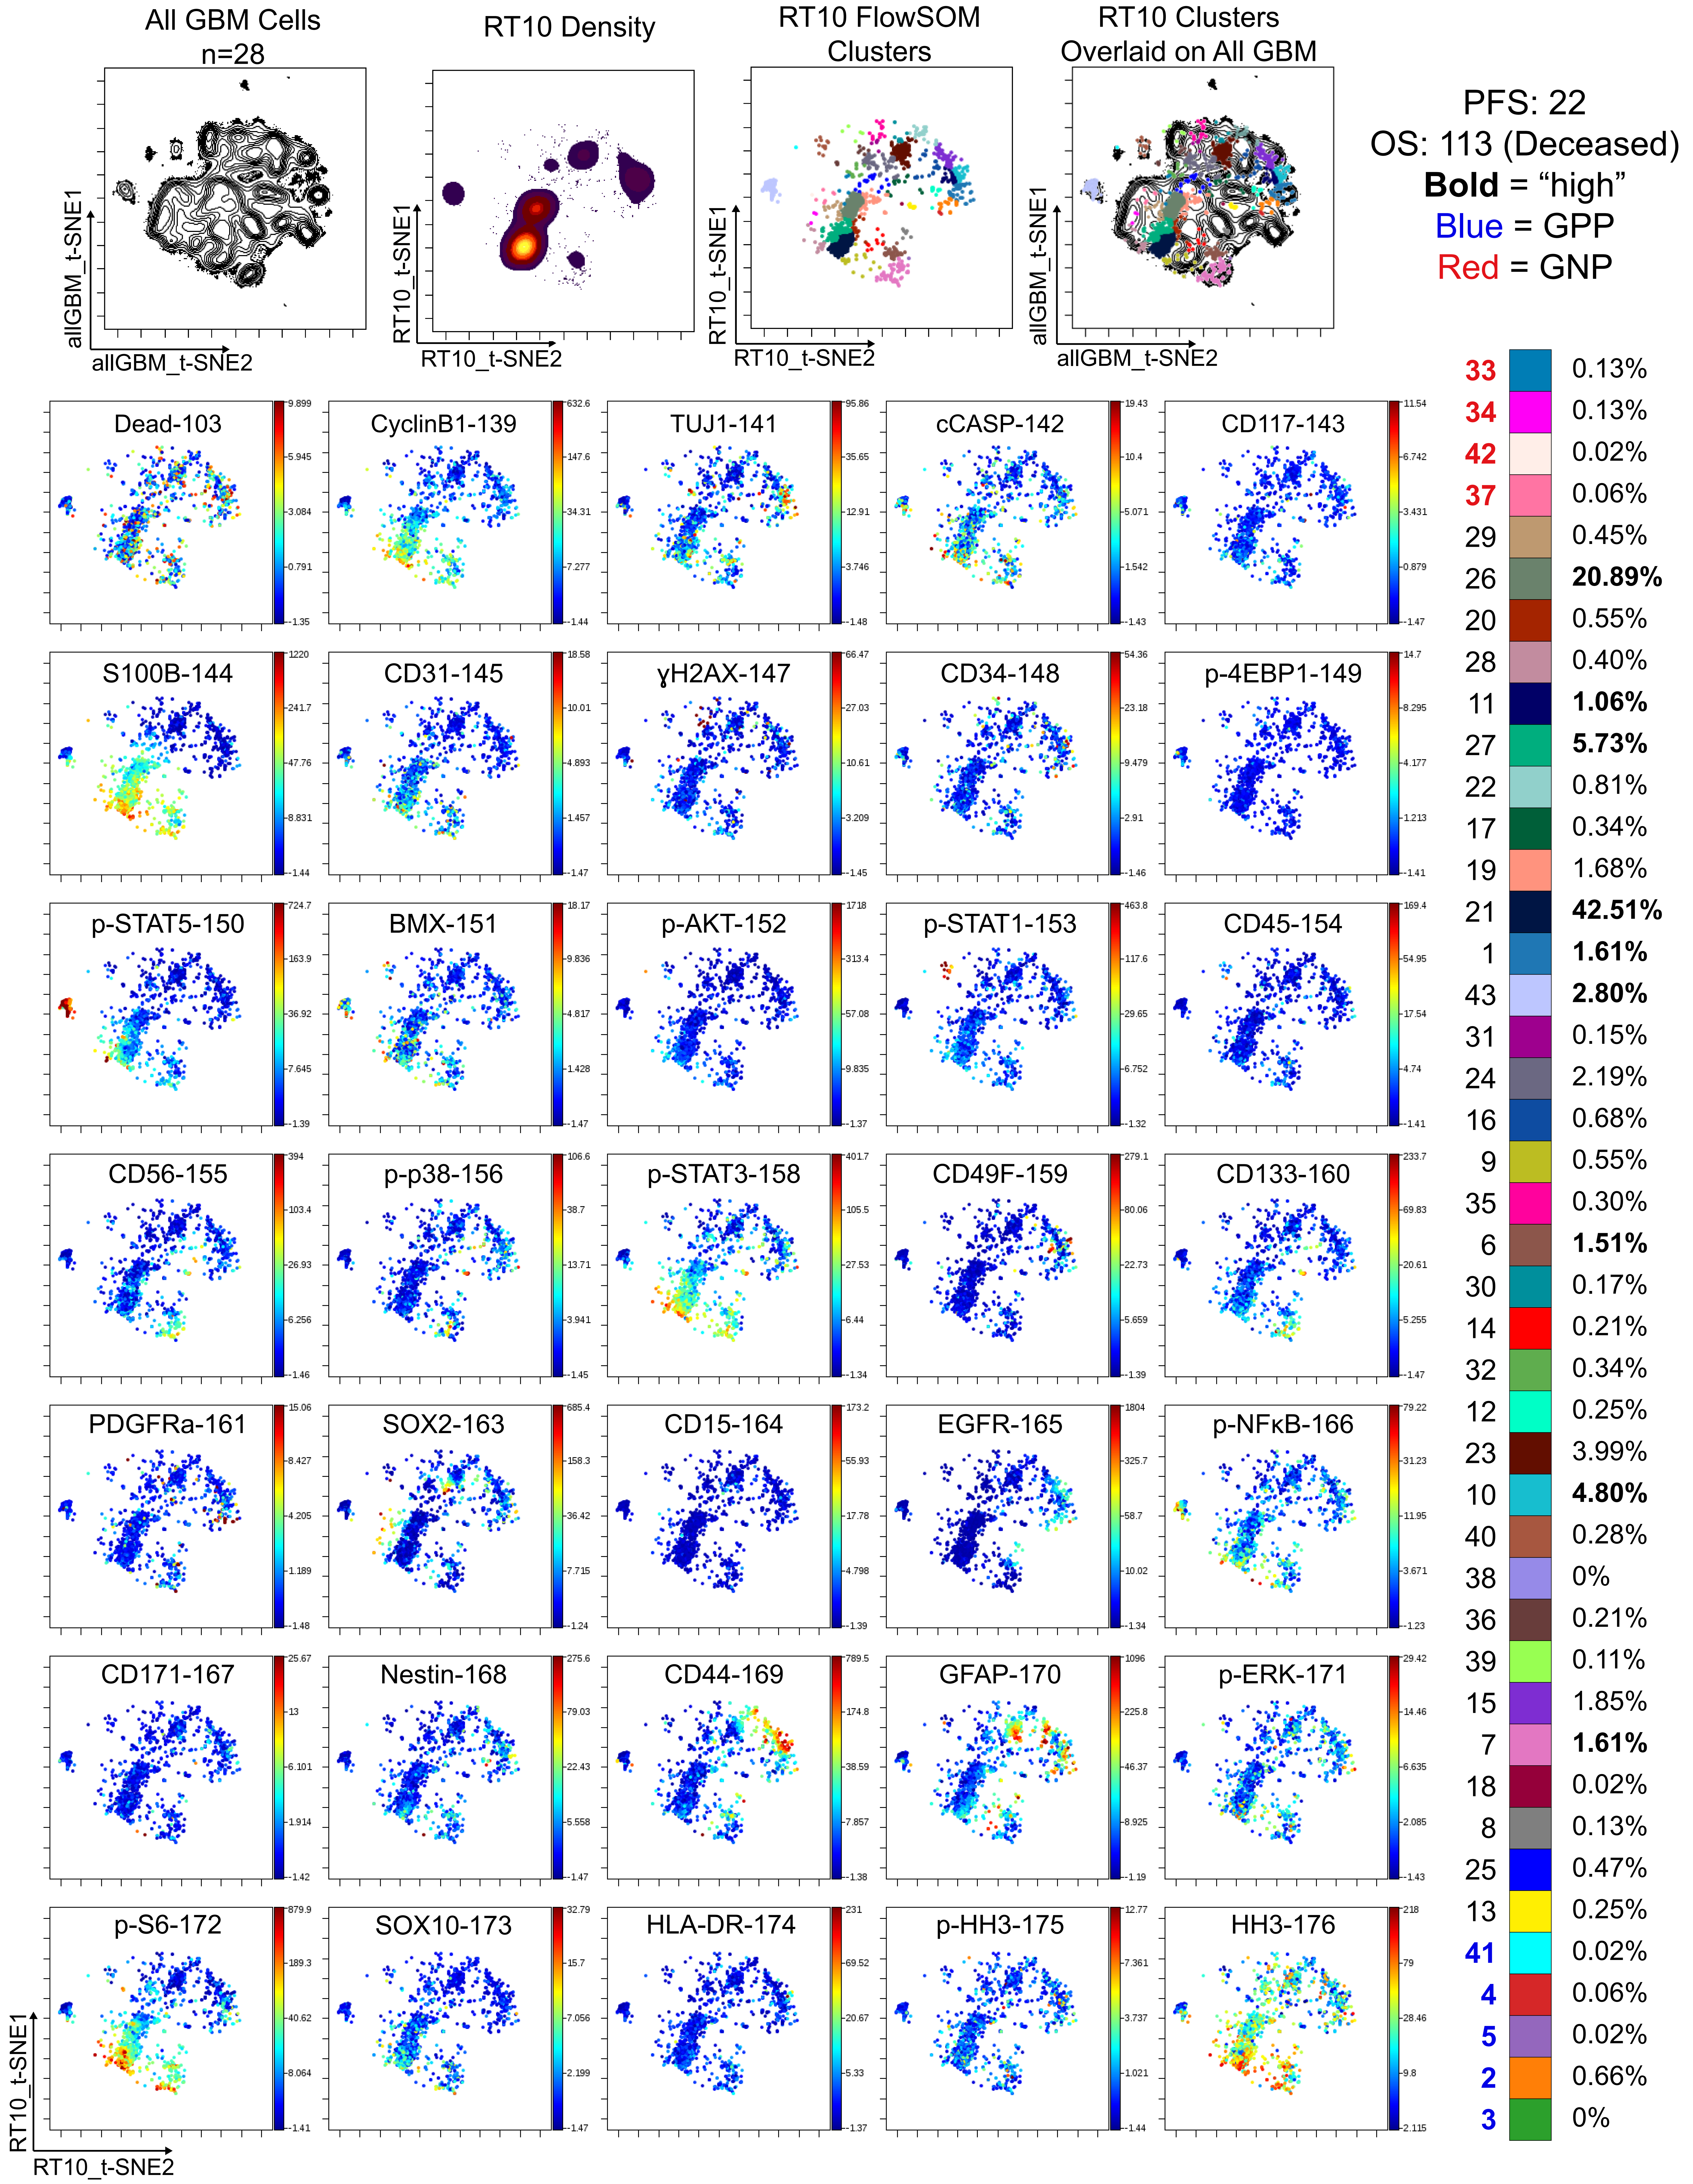



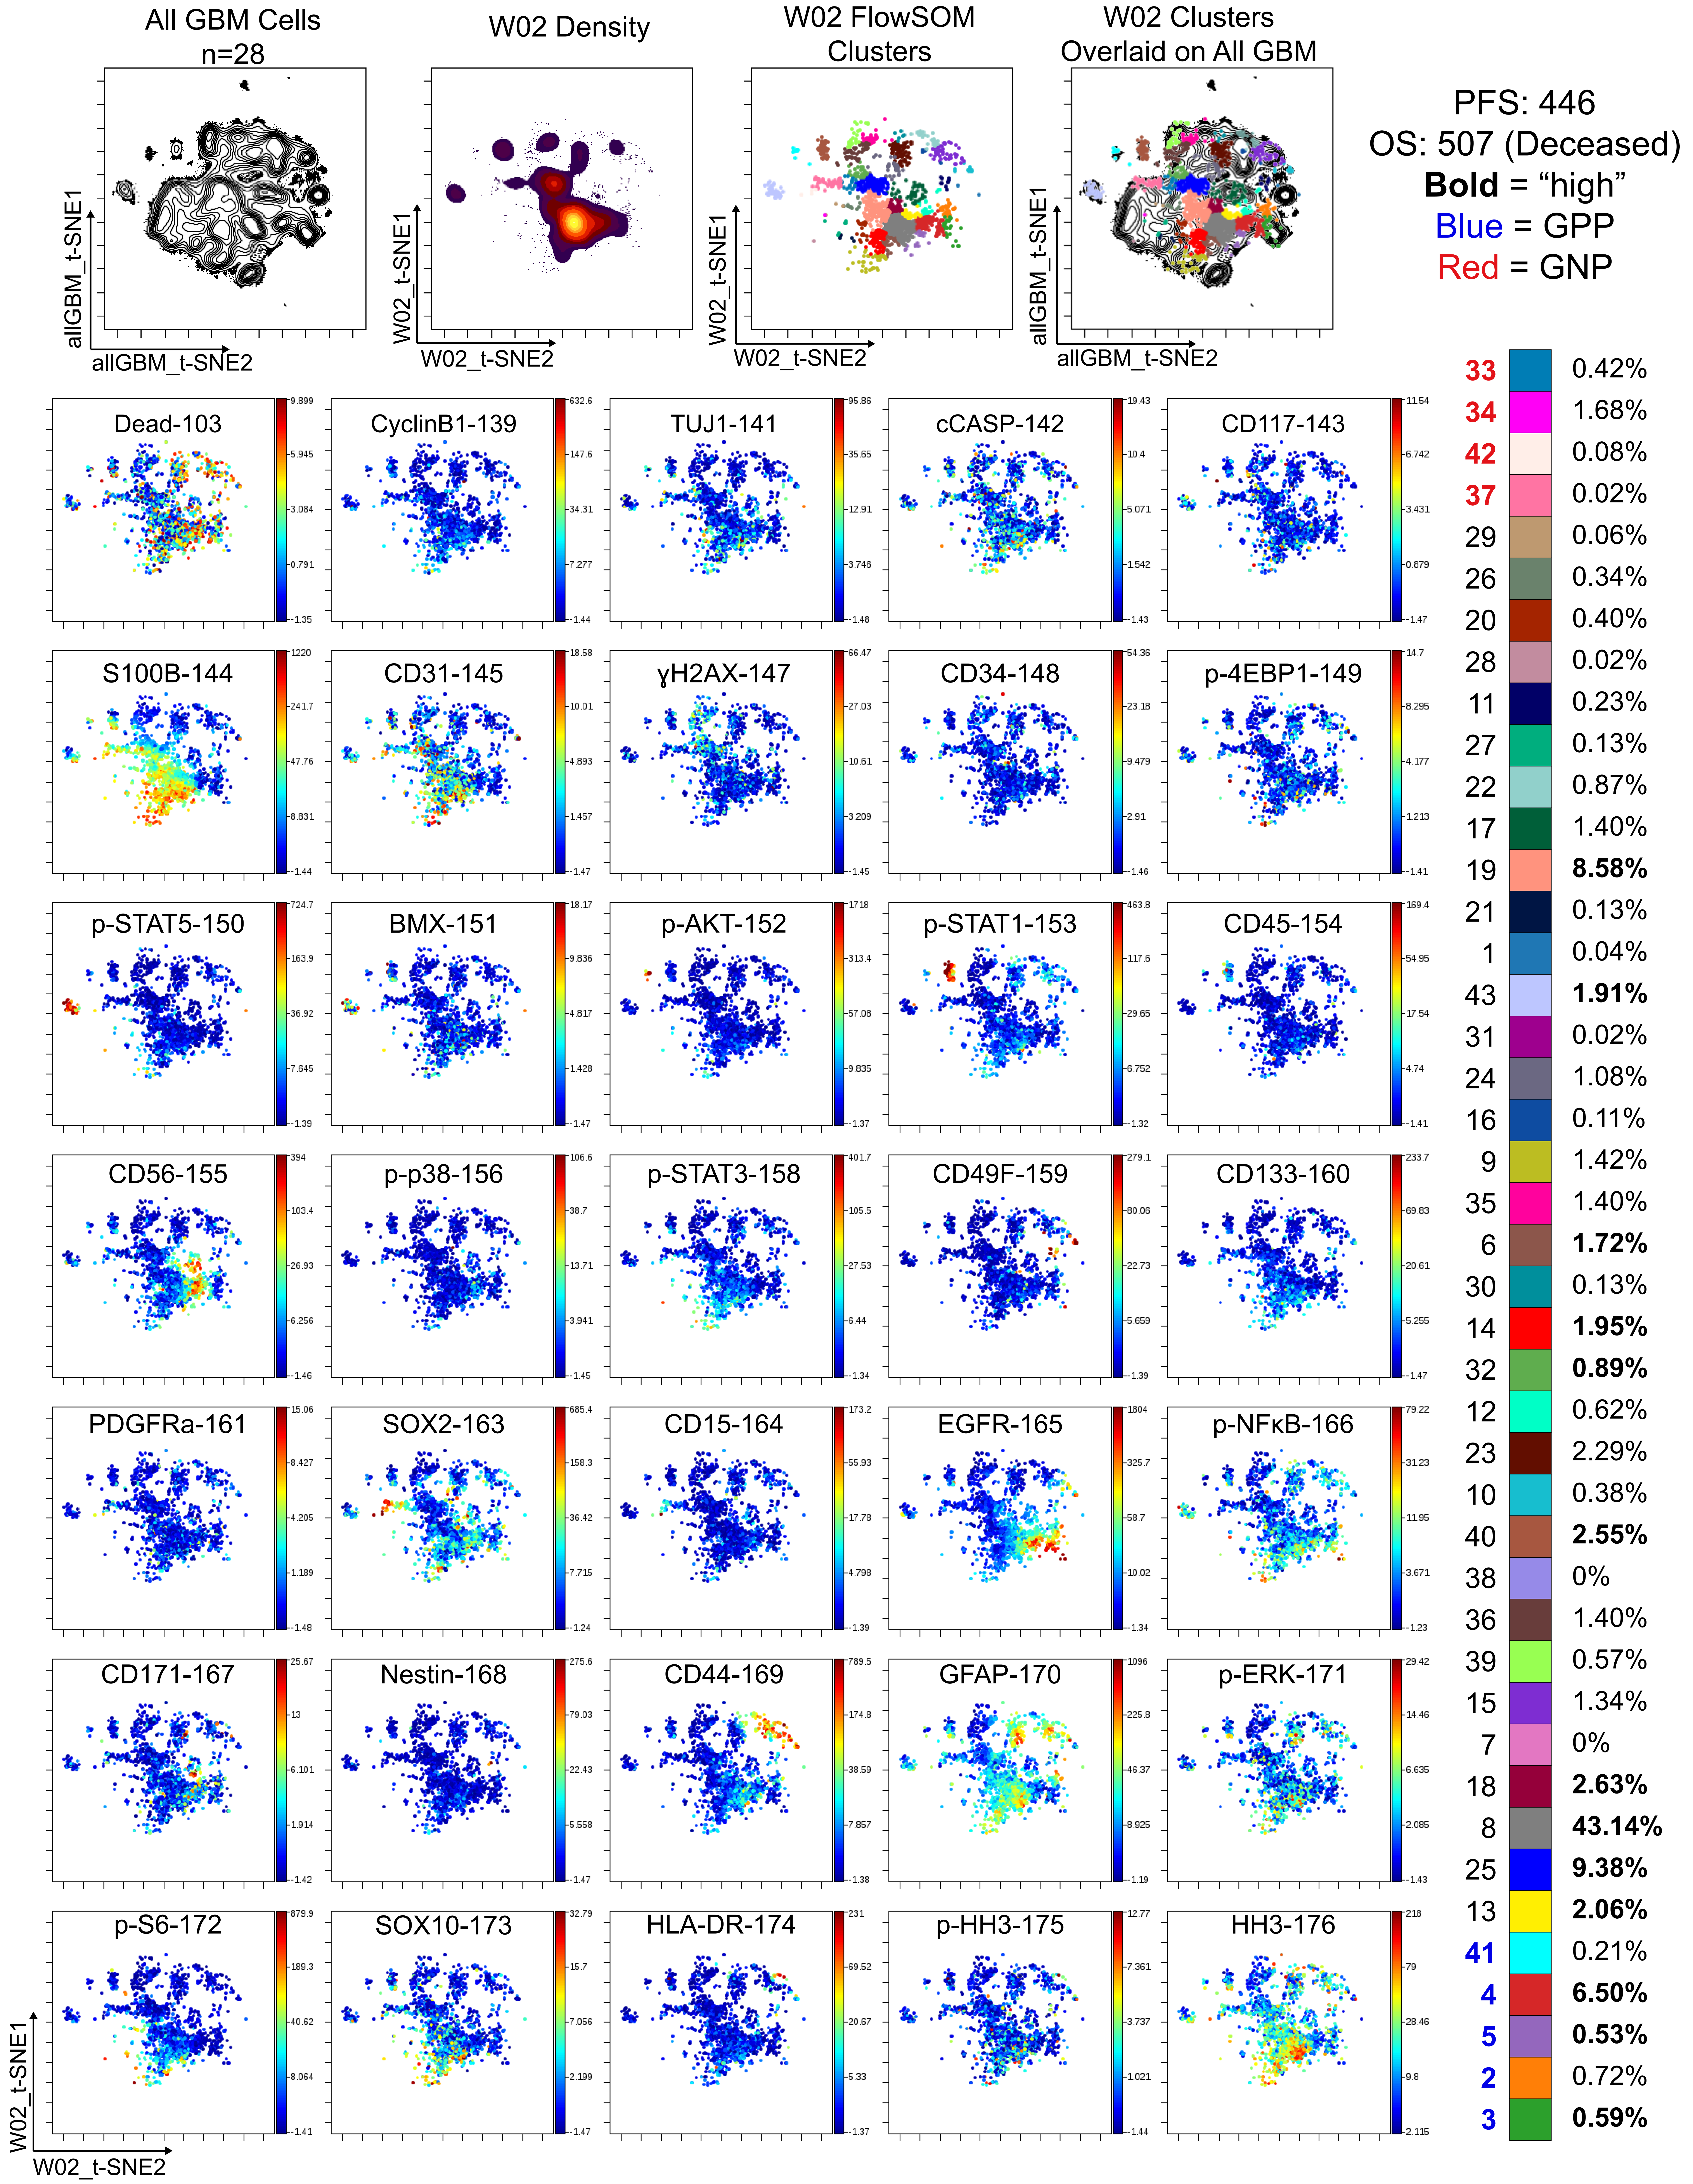



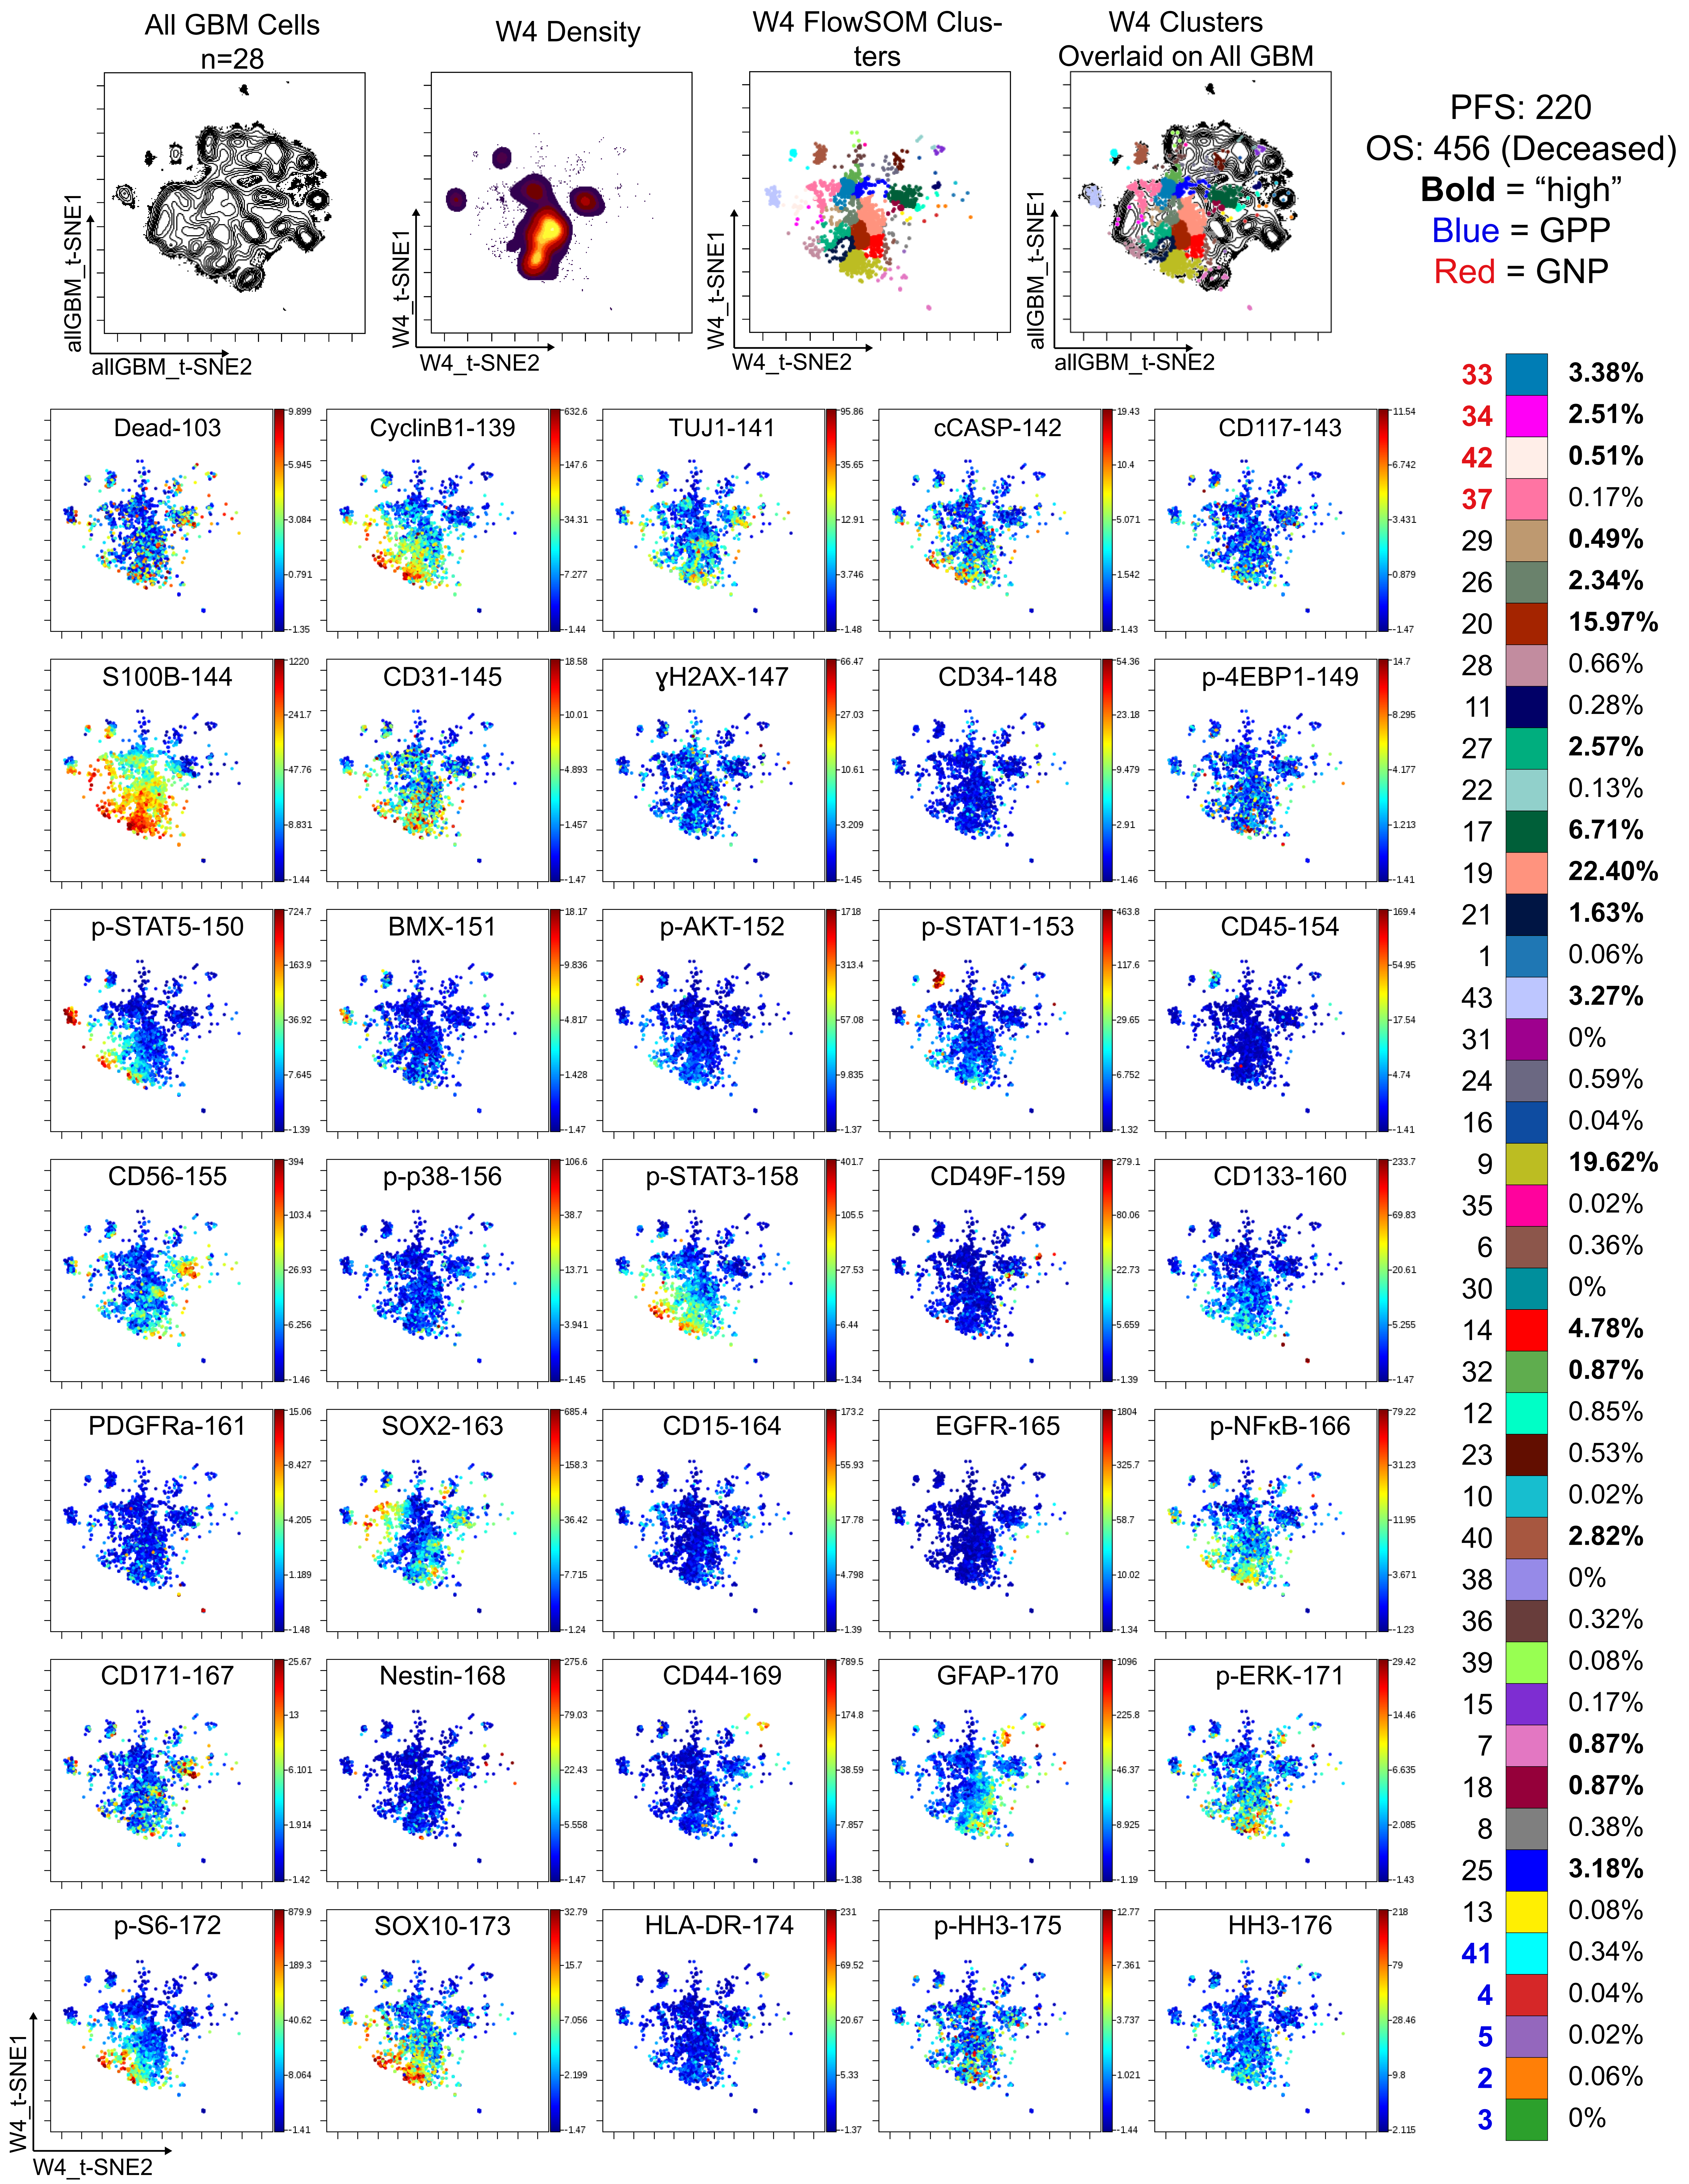



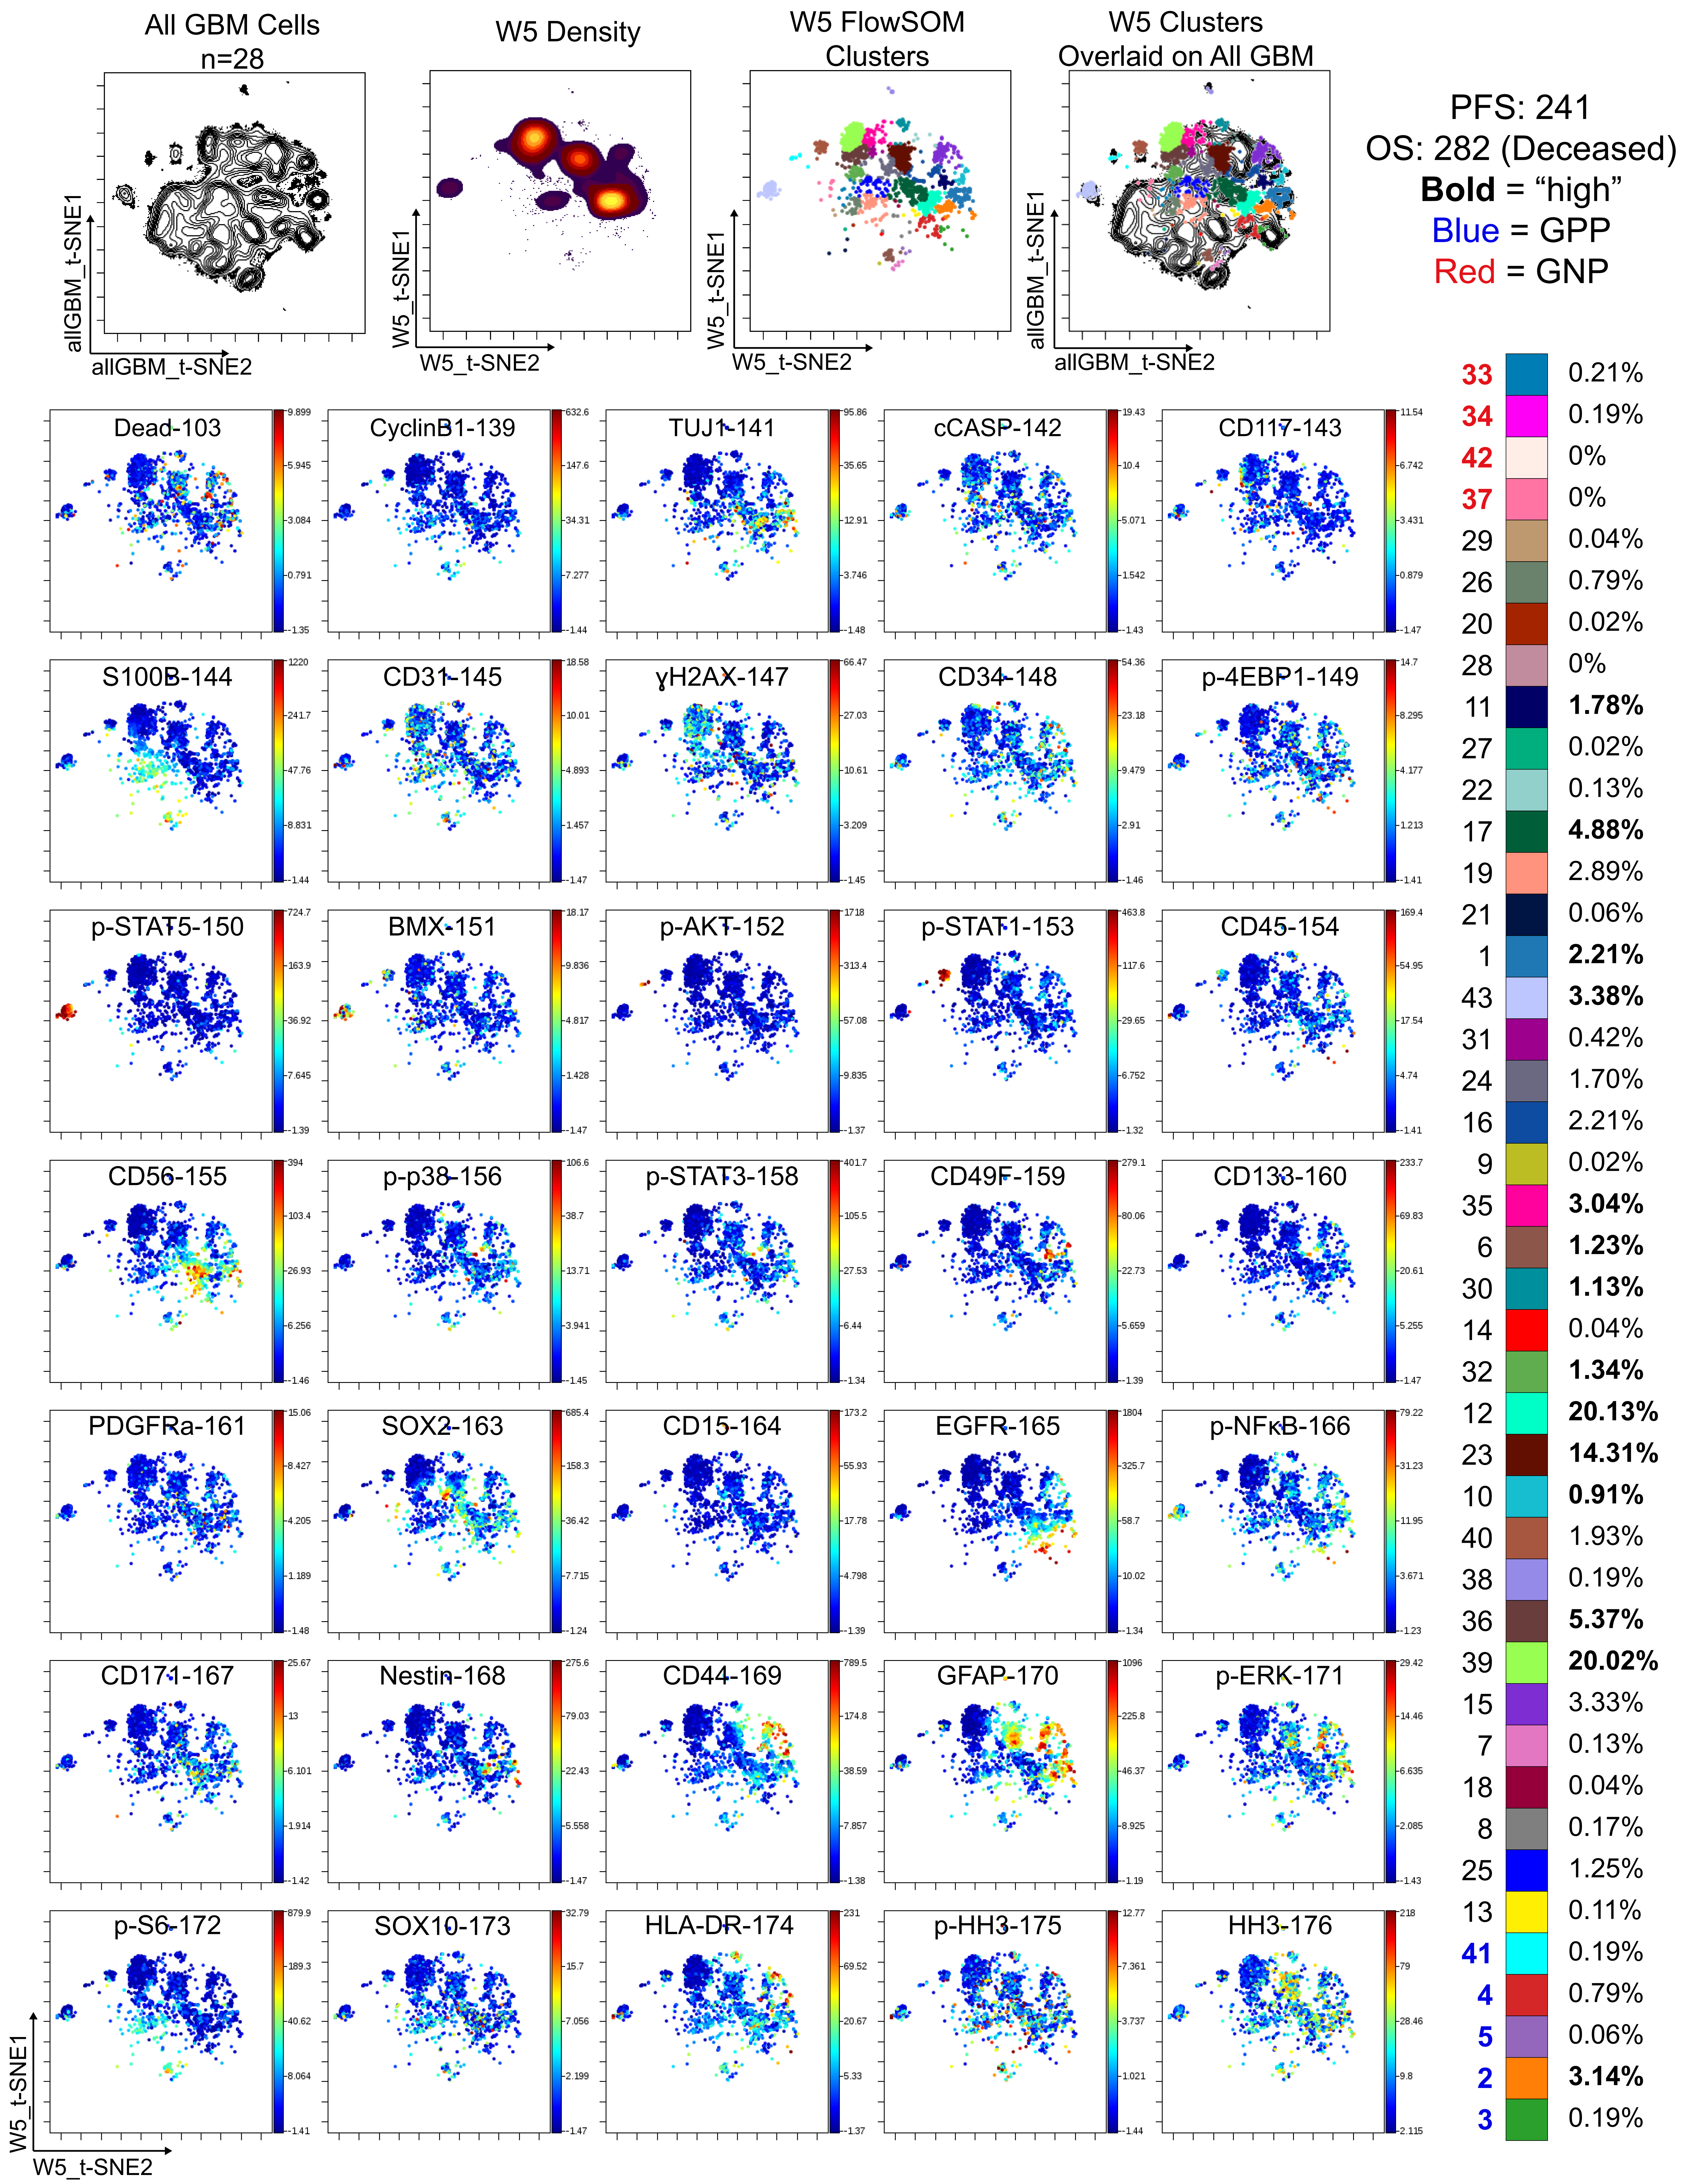



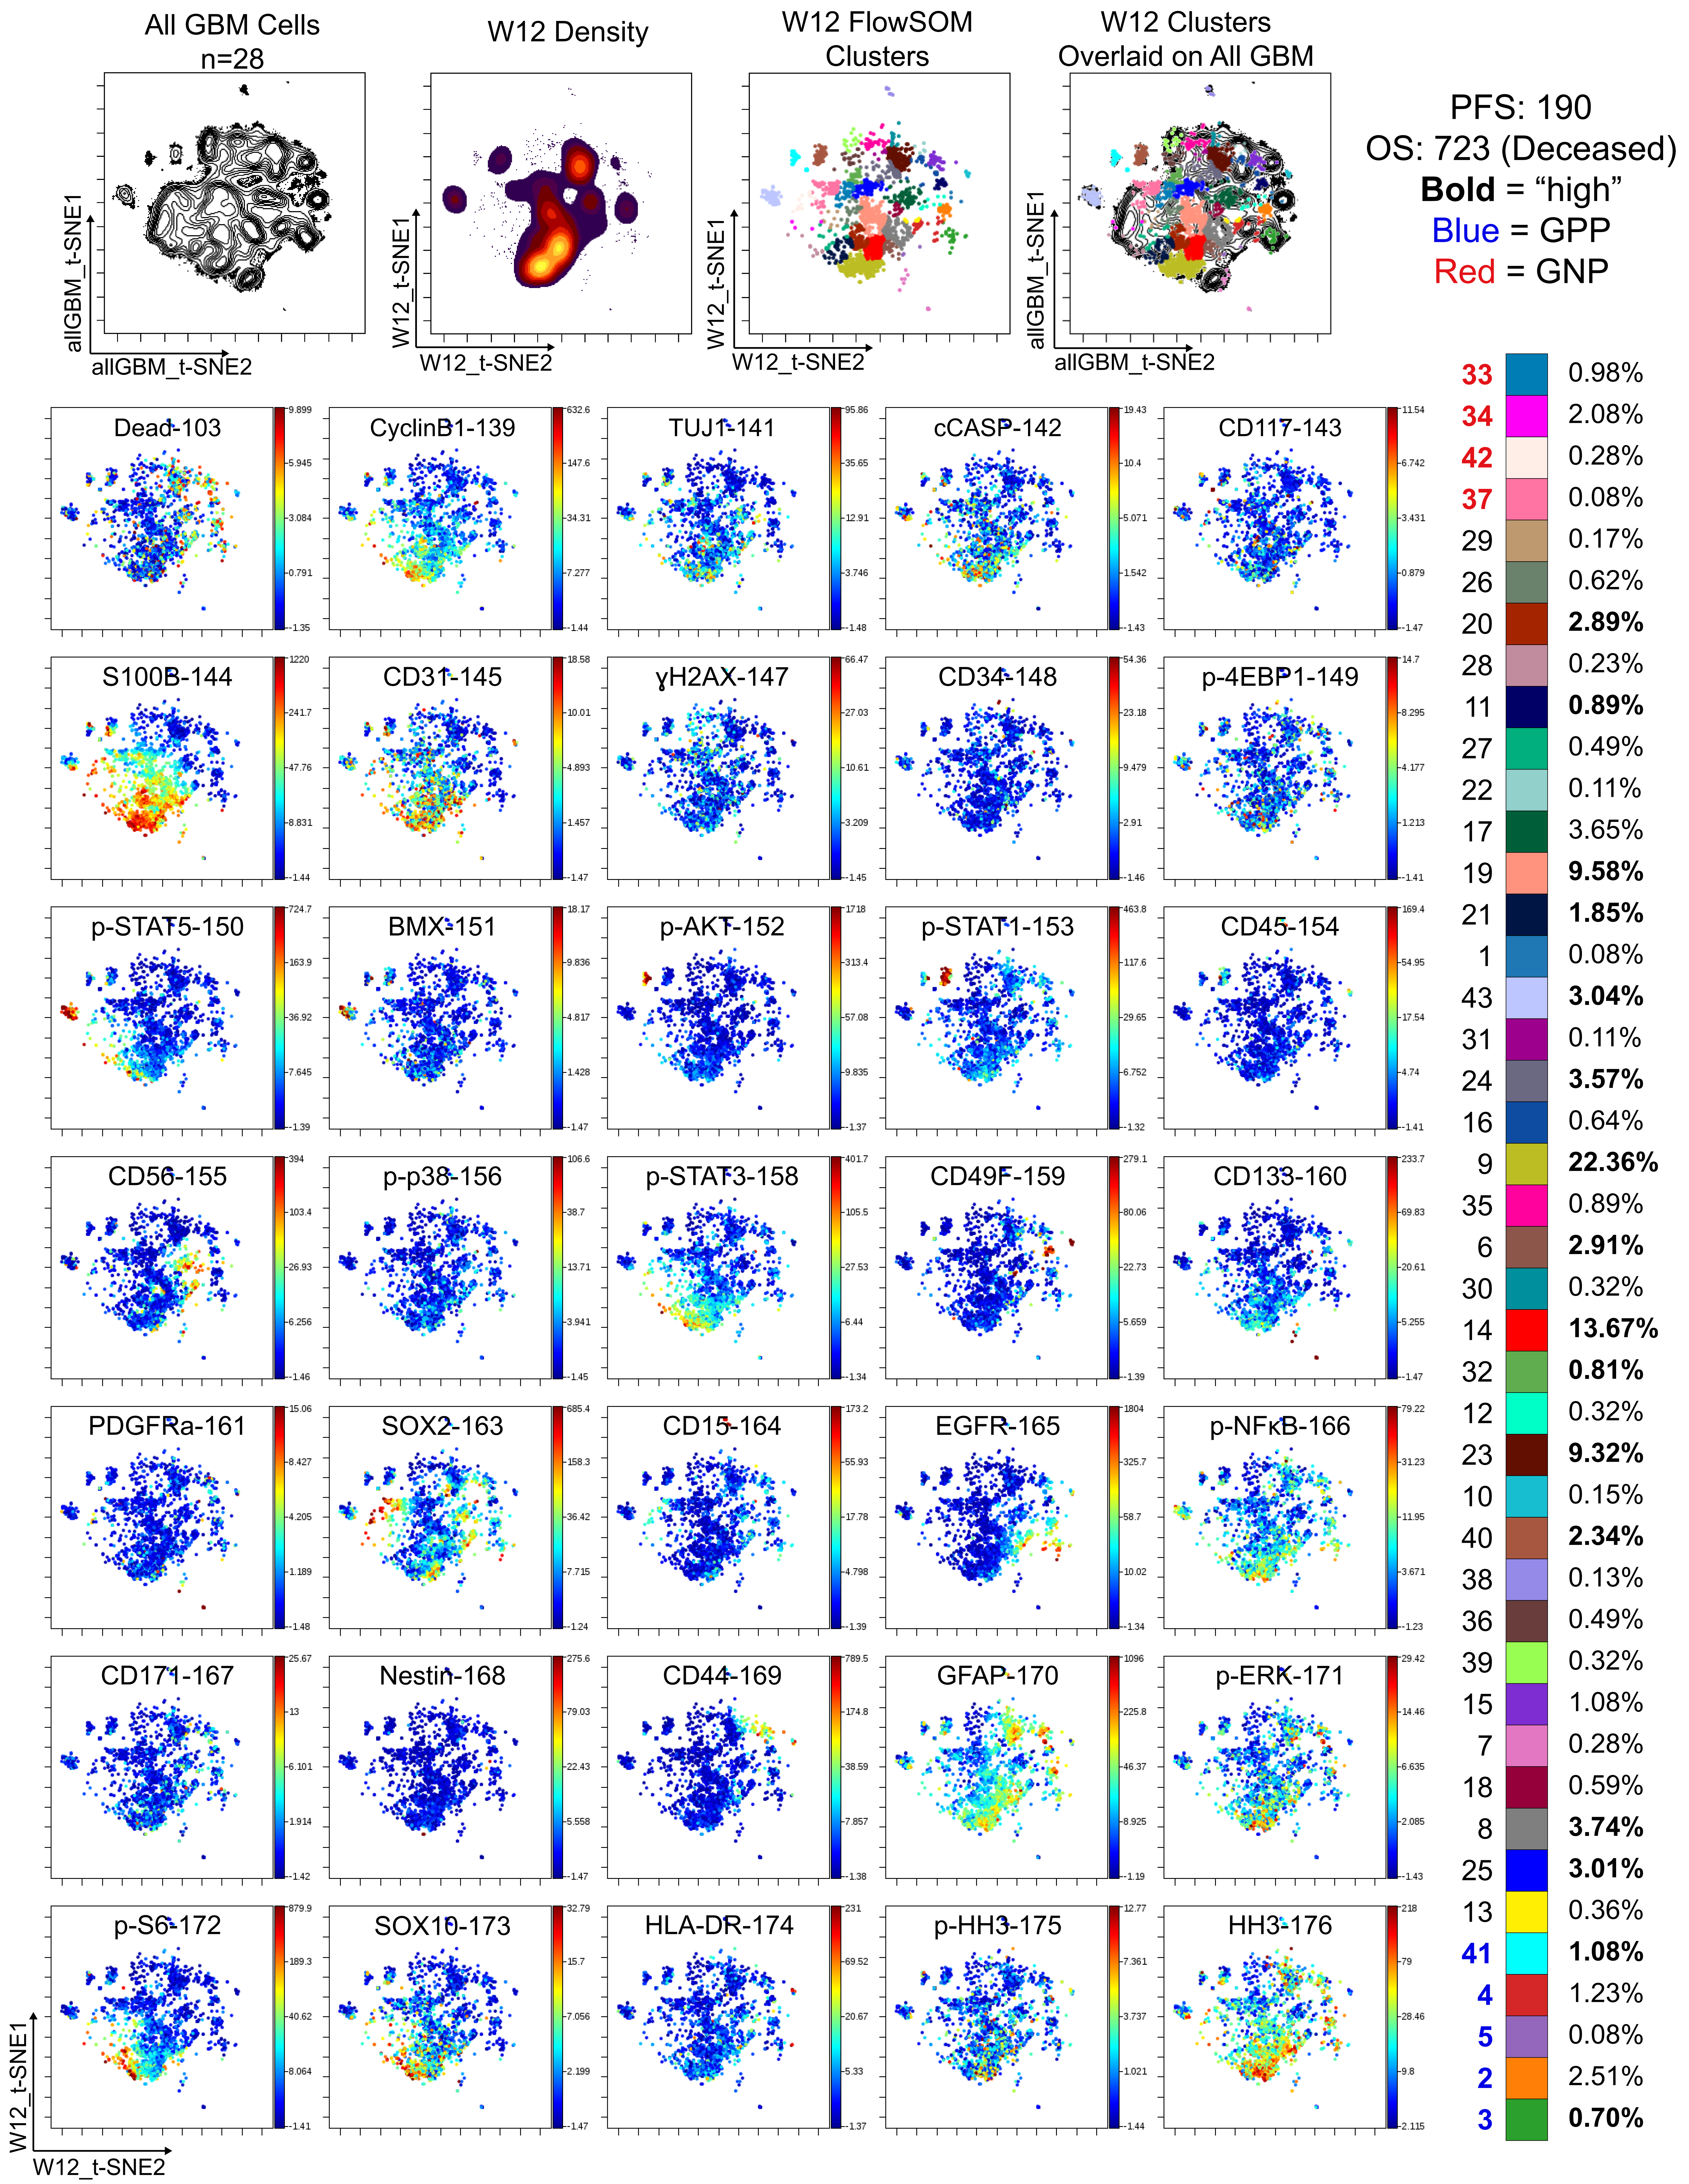

W12\_t-SNE1

W12\_t-SNE2
