# Supplementary material for: Unsupervised machine learning reveals risk stratifying glioblastoma tumor cells
Source: eLife. 2020 Jun 23;9:e56879. doi: 10.7554/eLife.56879 (PMC7340505; doi:10.7554/eLife.56879)
Supplement: Supplementary file 2. [file elife-56879-supp2.xlsx]

## Sheet: Sheet 1
Supplemental Table 2 - Cell Subset Abundance and Population Totals per Patient
Tumor / RAPID Subset	2	3	4	5	41*	13*	25	8	18*	7	15	39	36	38	40	10	23	12	32	14	30	6	35	9	16	24	31*	43	1	21	19	17	22	27*	11	28	20	26	29	33*	34	37	42	# above 1%	# above 5%	# above 50%	Stable GNP Total	Stable GPP Total	GPP - GNP
LC06	2.67516	87.3885	1.06157	0.0212314	0.764331	0.106157	0.339703	0.0212314	0	0	0.318471	1.97452	1.01911	0	0	0.0424628	0.530786	0.488323	0.0212314	0	0.0212314	0.0212314	0.403397	0	0.403397	0.89172	0.29724	0.7431	0	0	0	0.0212314	0	0	0.424628	0	0	0	0	0	0	0	0	5	1	1	0	91.1465	91.1465
W11	3.58811	1.61359	25.1592	28.3439	0.573248	1.99575	4.07643	1.54989	1.52866	1.40127	1.38004	8.49257	5.07431	0.360934	0.573248	0.721868	1.18896	0.806794	0.700637	0	0	1.1465	1.04034	0.0424628	0.360934	0.700637	0.0636943	1.38004	0.254777	0.0212314	3.46072	1.12527	0.191083	0.0212314	0.339703	0	0.0424628	0.318471	0.0212314	0.127389	0	0.191083	0.0212314	18	4	0	0.212314	58.7049	58.4926
LC26	5.49894	2.37792	10.828	2.9087	7.28238	1.95329	6.30573	1.10403	0.934183	3.50318	13.3758	2.71762	3.18471	1.18896	0.700637	2.92994	5.71125	2.44161	1.01911	0.0636943	3.09979	0.530786	4.4586	0.276008	1.91083	1.8259	0.360934	1.21019	0.106157	0.0636943	3.75796	2.44161	1.27389	0.0424628	0.955414	0	0.530786	0.59448	0	0.29724	0.0212314	0.191083	0.0212314	25	6	0	0.233546	21.6136	21.38
RT14	12.9299	2.80255	1.67728	1.84713	0.0212314	0.573248	13.0998	2.2293	1.40127	0.0636943	2.80255	0.212314	0.403397	0.0636943	1.33758	0.59448	0.700637	0.849257	1.61359	0.0636943	0.14862	16.1359	0.403397	0.764331	0.233546	0.764331	0.0636943	0.636943	0	2.29299	21.7622	0.7431	0.212314	0.806794	0.318471	0	0.191083	7.28238	0.339703	0.997877	0	0.615711	0	14	5	0	0.615711	19.2569	18.6412
K01	3.63057	2.54777	8.28025	0.360934	1.04034	0.29724	0.382166	0.0849257	0.127389	0	31.4225	14.034	8.49257	1.0828	1.38004	1.80467	2.569	1.40127	0.467091	0	0.467091	0	2.88747	0	4.75584	1.12527	0.318471	2.25053	0.169851	0	0.0424628	1.67728	5.79618	0	1.06157	0	0	0	0	0	0	0.0424628	0	19	5	0	0.0424628	14.8195	14.7771
LC04	1.33758	0.382166	11.6348	0.89172	0.127389	1.12527	3.39703	53.6306	1.10403	0	13.6093	0.14862	0.29724	0	2.71762	0.233546	1.21019	0.44586	0.169851	0.276008	0.0212314	0.764331	0.29724	0.424628	0.233546	0.467091	0.0424628	1.8259	0.0849257	0.0424628	1.61359	0.552017	0.339703	0.0424628	0	0.0212314	0.0636943	0.127389	0.0212314	0.0424628	0.0212314	0.212314	0	11	3	1	0.233546	14.2463	14.0127
LC25	6.6242	0.233546	1.59236	1.67728	0.658174	1.74098	1.59236	1.27389	0.509554	10.276	2.18684	6.30573	6.92144	2.9724	2.67516	1.78344	4.41614	1.67728	2.12314	2.2293	0.382166	0.403397	1.18896	5.90234	3.94904	3.80042	0.488323	6.41189	0.764331	0.169851	3.56688	7.0276	0.127389	0.318471	0.339703	0.0212314	0.615711	1.12527	0.254777	1.42251	0.127389	2.03822	0.0849257	27	7	0	2.25053	10.1274	7.87686
W02	0.721868	0.59448	6.49682	0.530786	0.212314	2.08068	9.38429	43.1423	2.6327	0	1.33758	0.573248	1.40127	0	2.54777	0.382166	2.29299	0.615711	0.89172	1.95329	0.127389	1.71975	1.40127	1.42251	0.106157	1.0828	0.0212314	1.91083	0.0424628	0.127389	8.57749	1.40127	0.870488	0.127389	0.233546	0.0212314	0.403397	0.339703	0.0636943	0.424628	0.0212314	1.67728	0.0849257	18	4	0	1.78344	8.34395	6.56051
W05	3.14225	0.191083	0.785563	0.0636943	0.191083	0.106157	1.25265	0.169851	0.0424628	0.127389	3.33333	20.0212	5.37155	0.191083	1.93206	0.912951	14.31	20.1274	1.33758	0.0424628	1.12527	1.23142	3.03609	0.0212314	2.20807	1.69851	0.424628	3.3758	2.20807	0.0636943	2.88747	4.88323	0.127389	0.0212314	1.78344	0	0.0212314	0.785563	0.0424628	0.212314	0	0.191083	0	19	4	0	0.191083	4.18259	3.99151
LC22	2.46285	0.233546	1.42251	0.127389	0.0212314	0.552017	0.488323	0.191083	0.0424628	0.424628	12.6964	1.42251	1.1465	0.0849257	1.40127	8.21656	7.79193	2.54777	0.318471	0.212314	2.46285	8.68365	1.57113	0.360934	4.16136	3.63057	0.59448	3.20594	2.42038	0.509554	3.69427	18.811	3.7155	0.509554	0.615711	0.0636943	0.997877	1.63482	0.14862	0.127389	0.0212314	0.191083	0.0636943	20	5	0	0.276008	4.24628	3.97028
W12	2.50531	0.700637	1.23142	0.0849257	1.0828	0.360934	3.01486	3.73673	0.59448	0.276008	1.0828	0.318471	0.488323	0.127389	2.33546	0.14862	9.32059	0.318471	0.806794	13.673	0.318471	2.9087	0.89172	22.3567	0.636943	3.56688	0.106157	3.03609	0.0849257	1.84713	9.57537	3.6518	0.106157	0.488323	0.89172	0.233546	2.88747	0.615711	0.169851	0.976645	0.0849257	2.08068	0.276008	18	4	0	2.44161	4.52229	2.08068
W14	0.339703	0.169851	0.360934	0.658174	0.552017	0.0636943	0.191083	0	0.0636943	0.0849257	5.92357	6.51805	3.90658	1.63482	0.212314	0.14862	10.828	0.424628	0.403397	0	3.14225	0.0849257	3.14225	0	25.2866	9.74522	3.24841	1.86837	0.0212314	0.0212314	0.191083	2.01699	17.4735	0	1.12527	0	0	0	0	0.0636943	0.0212314	0.0636943	0	14	6	0	0.0849257	1.52866	1.44374
LC27	1.0828	0.339703	0.721868	0	0.0849257	0.29724	0.955414	0.0849257	0.254777	0	3.12102	0.700637	1.29512	1.8896	0.360934	0.169851	5.09554	0.424628	0.424628	0	22.1868	0.127389	39.9363	0.0212314	3.50318	3.29087	5.98726	0.339703	0.0212314	0.0212314	0.997877	0.488323	4.01274	0.0212314	1.12527	0	0.0212314	0.127389	0.0212314	0.254777	0	0.191083	0	12	4	0	0.191083	2.14437	1.95329
RT01	0.828025	0.0212314	0.106157	0.0212314	0.0849257	0.0424628	0.0424628	0	0.0212314	0.106157	0.169851	3.7155	3.14225	0	2.71762	1.04034	4.84076	1.74098	0.14862	0	0.0849257	0.0849257	1.33758	0	1.10403	4.01274	0.530786	4.75584	63.5244	0.212314	0.0424628	3.12102	0.0849257	0.552017	1.23142	0.212314	0	0.212314	0.0849257	0.0212314	0	0	0	13	1	1	0	0.976645	0.976645
RT10	0.658174	0	0.0636943	0.0212314	0.0212314	0.254777	0.467091	0.127389	0.0212314	1.61359	1.84713	0.106157	0.212314	0	0.276008	4.7983	3.99151	0.254777	0.339703	0.212314	0.169851	1.50743	0.29724	0.552017	0.679406	2.18684	0.14862	2.80255	1.61359	42.5053	1.67728	0.339703	0.806794	5.73248	1.06157	0.403397	0.552017	20.8917	0.44586	0.127389	0.0636943	0.127389	0.0212314	13	3	0	0.212314	0.7431	0.530786
LC21	1.25265	0	0.721868	0.573248	0.0212314	1.16773	21.8047	3.7155	8.1104	0.127389	0.233546	0.360934	0.976645	0	0.997877	0.169851	2.48408	3.92781	2.67516	0.44586	0.467091	14.0552	1.33758	0.679406	0.0636943	1.27389	0.191083	0.89172	0.106157	0.615711	21.7622	0.870488	0.106157	0.106157	1.8259	0	1.10403	1.97452	0.0636943	1.8259	0	0.89172	0.0212314	16	4	0	0.912951	2.54777	1.63482
W15	0.212314	0.0636943	0.0849257	0.0636943	0.0849257	0.700637	0.615711	0.0424628	0.14862	12.1444	4.47983	0.59448	1.18896	0.360934	0.318471	1.50743	9.29936	0.254777	0.658174	0.212314	0.785563	0.127389	0.870488	0.403397	37.5796	2.59023	0.573248	0.934183	0.14862	0.89172	1.65605	2.12314	10.2335	2.65393	1.21019	1.54989	0.318471	1.31635	0.212314	0.360934	0.0849257	0.29724	0.0424628	14	4	0	0.424628	0.424628	0
RT15	0.29724	0.0212314	0.127389	0.509554	0.106157	5.11677	0.976645	0	0.29724	61.5287	0.339703	1.46497	2.08068	0.318471	0.7431	0.106157	0.89172	0.403397	1.10403	0.254777	0.0212314	1.18896	0.254777	0.955414	2.16561	0.403397	0.127389	1.38004	0.127389	1.27389	2.9724	4.54352	0.127389	2.12314	0.233546	0.254777	0.360934	2.92994	0.44586	0.59448	0.14862	0.552017	0.127389	13	2	1	0.828025	0.955414	0.127389
LC08	0	0	0	0	0.318471	0.212314	0.382166	0.0212314	0.0424628	0.7431	1.29512	0.573248	1.04034	0	1.46497	0.106157	1.44374	0.700637	0.530786	1.33758	3.82166	0.254777	2.95117	17.6221	2.39915	28.0255	3.29087	1.52866	0.29724	0.870488	1.76221	7.85563	4.90446	1.69851	0.530786	0.806794	5.26539	2.20807	1.25265	0.976645	0.29724	0.934183	0.233546	19	4	0	1.46497	0	-1.46497
LC11	0.0212314	0	0.254777	0.0212314	0.467091	0.382166	5.03185	0.212314	0.7431	0.382166	0.0212314	0.7431	1.63482	0	0.0212314	0	0.276008	3.50318	3.3758	0.721868	0.0636943	0.424628	0.403397	4.1189	0.0636943	1.21019	0.14862	1.99575	0.106157	4.16136	12.2718	14.2675	0	14.4586	0.934183	3.80042	2.92994	11.6348	3.84289	3.26964	0.318471	1.52866	0.233546	17	5	0	2.08068	0.29724	-1.78344
LC18	0.0636943	0.0212314	0.169851	0	0.276008	0	1.91083	0.106157	0.0849257	0	3.99151	0.658174	0.934183	5.07431	1.10403	0.127389	5.71125	0.14862	1.84713	0.828025	7.60085	0.14862	9.93631	0.467091	7.26115	12.8238	8.76858	0.658174	0.0212314	0.212314	3.58811	1.25265	13.1847	0.212314	2.52654	0	1.25265	0.509554	0.254777	3.09979	0.0424628	2.76008	0.360934	18	8	0	3.16348	0.254777	-2.9087
W04	0.0636943	0	0.0424628	0.0212314	0.339703	0.0849257	3.18471	0.382166	0.870488	0.870488	0.169851	0.0849257	0.318471	0	2.82378	0.0212314	0.530786	0.849257	0.870488	4.77707	0	0.360934	0.0212314	19.6178	0.0424628	0.59448	0	3.26964	0.0636943	1.63482	22.3992	6.70913	0.127389	2.569	0.276008	0.658174	15.966	2.33546	0.488323	3.3758	0.169851	2.50531	0.509554	13	4	0	3.18471	0.127389	-3.05732
LC03	0.0424628	0	0	0.0212314	0.636943	0	1.63482	0.89172	0.0636943	0.0424628	0.106157	0.106157	0.14862	0	3.82166	0.0849257	1.16773	0.785563	0.530786	28.0255	0.106157	0.509554	0.382166	32.8875	0.106157	1.57113	0.127389	1.54989	0.318471	0.467091	9.55414	1.59236	0	0.573248	0	0.106157	3.09979	0.785563	0.403397	2.10191	0.44586	4.54352	0.658174	12	3	0	5.64756	0.0636943	-5.58386
LC09	0.0212314	0.0212314	0	0	5.85987	0.0212314	2.20807	0.106157	0.870488	0.0424628	0	0.467091	1.44374	0	5.75372	0	0.0849257	0.191083	2.2293	1.42251	0	0	0.169851	5.52017	0.0212314	0.254777	0.0849257	2.35669	0	0.318471	14.0552	15.7325	0	0.997877	0.997877	0.403397	23.5669	0.870488	0.573248	8.76858	0.14862	3.6518	0.764331	13	7	0	4.56476	0.0424628	-4.52229
LC10	0	0	0	0	0.0424628	0	0.509554	0.0212314	0.106157	0.29724	0	0.0636943	0.488323	0	0	0	0.254777	0	1.0828	0.530786	0	0	0.127389	0.764331	0	0.424628	0.0212314	0.806794	0	1.31635	1.21019	2.67516	0	24.9257	0.0636943	30.3397	0.29724	4.92569	14.1401	6.79406	3.35456	4.03397	0.382166	11	4	0	7.7707	0	-7.7707
RT07	0.0212314	0	0.0424628	0	0	0	0.106157	0.0212314	0	0.0212314	0.0212314	0.0424628	0.424628	0	0.636943	0.0212314	0.0212314	0	0.403397	0.169851	0	0	0	0.0636943	0	0.721868	0.106157	0.403397	0	0.488323	0.233546	0.0636943	0	11.2314	0.0212314	17.6433	0.0212314	1.25265	20.7006	7.0276	24.2038	13.0998	0.764331	7	6	0	38.0679	0.0636943	-38.0042
LC12	0.0212314	0	0.106157	0.0212314	0.0849257	0	0.0636943	0.0212314	0.0212314	0.488323	0	0.0849257	0.0636943	0	0	0	0	0.0212314	0.254777	0	0	0	0	0.127389	0	0.191083	0.0424628	1.04034	0	0.0212314	0.0424628	0.0424628	0	3.3121	0.0849257	32.7813	0	0.29724	4.14013	1.21019	34.9257	11.5924	8.89597	8	4	0	55.414	0.14862	-55.2654
LC02	0	0	0.0212314	0	0.106157	0.0212314	0.382166	0.0212314	0.14862	0.0212314	0	0.0636943	0.254777	0	0.0212314	0	0	0.0212314	0.212314	0.29724	0	0	0.0849257	0.509554	0.0212314	0.212314	0.0424628	1.0828	0	0.0424628	0.849257	2.42038	0.0212314	1.91083	0.169851	3.29087	0.467091	0.382166	2.67516	4.09766	12.5053	36.1359	31.4862	9	3	0	80.1274	0.0212314	-80.1062
IQR	2.51062	0.435244	1.40658	0.525478	0.504246	0.769639	2.85563	1.12527	0.828025	0.753715	3.34395	2.02229	1.92675	0.360934	2.08068	0.907643	4.71868	1.2155	0.774947	0.923567	0.854565	1.13057	1.61359	2.03822	2.61146	2.68577	0.435244	1.54459	0.249469	0.944798	7.86093	3.78981	1.86837	2.19214	0.843949	0.695329	1.11996	1.71975	0.472399	2.22399	0.201699	2.37792	0.366242
P Value	0.0207177	0.0152223	0.0429666	0.037026	0.0428979	0.0615763	0.0643258	0.1001	0.160191	0.231869	0.303519	0.337632	0.451048	0.635249	0.770028	0.904585	0.991006	0.971205	0.830159	0.839538	0.820831	0.819663	0.794678	0.71125	0.696884	0.644396	0.541383	0.529192	0.516099	0.45745	0.419602	0.388284	0.345655	0.308193	0.279544	0.246803	0.234161	0.137696	0.0659125	0.00405254	0.0474557	0.00773734	0.0167408
HR	0.302862	0.290807	0.397429	0.385501	0.389384	0.404144	0.44968	0.472869	0.531423	0.566602	0.617968	0.634592	0.712308	0.787	0.88191	0.947401	1.00491	1.01652	1.0918	1.0958	1.11425	1.1002	1.13239	1.18199	1.19249	1.22242	1.30582	1.28337	1.32358	1.40365	1.42898	1.46849	1.55861	1.59725	1.56587	1.70281	1.72692	1.99901	2.28953	4.22749	2.50215	3.31802	3.02839
F-measure	0.772482	0.919631	0.816312	0.854317	0.980797	0.49251	0.675552	0.845566	0.437905	0.949703	0.84057	0.912702	0.895896	1	0.976856	0.963102	0.717978	0.609385	0.531471	0.633279	0.868837	0.839263	0.881682	0.838771	0.800382	0.708779	0.444437	0.99968	0.981817	0.881764	0.521133	0.697425	0.759478	0.493795	0.965955	0.625855	0.657698	0.584613	0.548051	0.49956	0.610779	0.672385	0.538104
# >1%	12	5	10	4	4	7	14	8	5	6	16	10	16	6	14	7	18	8	10	7	7	9	13	8	12	17	4	20	4	7	20	20	8	10	9	6	8	12	6	11	4	12	2
#> 0%	25	18	24	21	27	23	28	25	26	22	24	28	28	13	25	23	26	26	28	21	21	22	26	24	25	28	27	28	21	26	27	28	21	25	26	18	23	25	24	26	20	26	20
[truncated: 13 more columns]
