# Supplementary material for: Unsupervised machine learning reveals risk stratifying glioblastoma tumor cells
Source: eLife. 2020 Jun 23;9:e56879. doi: 10.7554/eLife.56879 (PMC7340505; doi:10.7554/eLife.56879)
Supplement: Supplementary file 5. [file elife-56879-supp5.xlsx]

## Sheet: Sheet1
Supplemental Table 5. Tumor Cell Abundance per Cell Subset
Tumor / RAPID Subset	2	3	4	5	41*	13*	25	8	18*	7	15	39	36	38	40	10	23	12	32	14	30	6	35	9	16	24	31*	43	1	21	19	17	22	27*	11	28	20	26	29	33*	34	37	42
LC06	5.35	87.63	1.45	0.05	3.63	0.55	0.41	0.02	0	0	0.3	2.72	1.91	0	0	0.16	0.55	1.08	0.08	0	0.05	0.04	0.51	0	0.41	1	1.13	1.39	0	0	0	0.02	0	0	2.08	0	0	0	0	0	0	0	0
W11	7.17	1.62	34.47	73.07	2.72	10.36	4.86	1.37	7.35	1.48	1.31	11.7	9.51	2.35	1.47	2.77	1.23	1.78	2.64	0	0	2.19	1.32	0.04	0.36	0.79	0.24	2.57	0.35	0.04	2.24	1.04	0.3	0.03	1.67	0	0.07	0.49	0.04	0.26	0	0.21	0.05
LC26	10.99	2.38	14.83	7.5	34.58	10.14	7.52	0.98	4.49	3.7	12.71	3.74	5.97	7.75	1.8	11.24	5.89	5.38	3.84	0.11	6.65	1.01	5.66	0.24	1.93	2.05	1.38	2.26	0.15	0.11	2.44	2.25	2	0.06	4.69	0	0.87	0.91	0	0.61	0.03	0.21	0.05
RT14	25.84	2.81	2.3	4.76	0.1	2.98	15.63	1.97	6.74	0.07	2.66	0.29	0.76	0.41	3.44	2.28	0.72	1.87	6.08	0.11	0.32	30.78	0.51	0.66	0.24	0.86	0.24	1.19	0	3.81	14.11	0.69	0.33	1.07	1.56	0	0.31	11.12	0.67	2.05	0	0.68	0
K01	7.25	2.55	11.34	0.93	4.94	1.54	0.46	0.08	0.61	0	29.85	19.34	15.92	7.05	3.55	6.92	2.65	3.09	1.76	0	1	0	3.66	0	4.79	1.26	1.21	4.19	0.23	0	0.03	1.55	9.08	0	5.21	0	0	0	0	0	0	0.05	0
LC04	2.67	0.38	15.94	2.3	0.6	5.84	4.05	47.5	5.31	0	12.93	0.2	0.56	0	6.99	0.9	1.25	0.98	0.64	0.48	0.05	1.46	0.38	0.37	0.24	0.52	0.16	3.4	0.12	0.07	1.05	0.51	0.53	0.06	0	0.02	0.1	0.19	0.04	0.09	0.03	0.24	0
LC25	13.24	0.23	2.18	4.32	3.13	9.04	1.9	1.13	2.45	10.86	2.08	8.69	12.97	19.36	6.88	6.84	4.55	3.7	7.99	3.86	0.82	0.77	1.51	5.09	3.98	4.27	1.86	11.95	1.05	0.28	2.31	6.48	0.2	0.42	1.67	0.02	1.01	1.72	0.5	2.93	0.17	2.26	0.19
W02	1.44	0.6	8.9	1.37	1.01	10.8	11.2	38.21	12.67	0	1.27	0.79	2.63	0	6.55	1.47	2.36	1.36	3.36	3.38	0.27	3.28	1.78	1.23	0.11	1.22	0.08	3.56	0.06	0.21	5.56	1.29	1.36	0.17	1.15	0.02	0.66	0.52	0.13	0.87	0.03	1.86	0.19
W05	6.28	0.19	1.08	0.16	0.91	0.55	1.49	0.15	0.2	0.13	3.17	27.59	10.07	1.24	4.97	3.5	14.76	44.36	5.04	0.07	2.41	2.35	3.85	0.02	2.22	1.91	1.62	6.29	3.05	0.11	1.87	4.5	0.2	0.03	8.75	0	0.03	1.2	0.08	0.44	0	0.21	0
LC22	4.92	0.23	1.95	0.33	0.1	2.87	0.58	0.17	0.2	0.45	12.06	1.96	2.15	0.55	3.6	31.51	8.04	5.62	1.2	0.37	5.28	16.57	1.99	0.31	4.19	4.08	2.27	5.98	3.34	0.85	2.4	17.35	5.82	0.68	3.02	0.07	1.64	2.5	0.29	0.26	0.03	0.21	0.14
W12	5.01	0.7	1.69	0.22	5.14	1.87	3.6	3.31	2.86	0.29	1.03	0.44	0.92	0.83	6.01	0.57	9.61	0.7	3.04	23.68	0.68	5.55	1.13	19.29	0.64	4	0.4	5.66	0.12	3.07	6.21	3.37	0.17	0.65	4.38	0.25	4.74	0.94	0.33	2.01	0.11	2.3	0.61
W14	0.68	0.17	0.49	1.7	2.62	0.33	0.23	0	0.31	0.09	5.63	8.98	7.32	10.65	0.55	0.57	11.17	0.94	1.52	0	6.74	0.16	3.99	0	25.48	10.94	12.39	3.48	0.03	0.04	0.12	1.86	27.37	0	5.52	0	0	0	0	0.13	0.03	0.07	0
LC27	2.16	0.34	0.99	0	0.4	1.54	1.14	0.08	1.23	0	2.96	0.97	2.43	12.31	0.93	0.65	5.26	0.94	1.6	0	47.59	0.24	50.66	0.02	3.53	3.69	22.83	0.63	0.03	0.04	0.65	0.45	6.29	0.03	5.52	0	0.03	0.19	0.04	0.52	0	0.21	0
RT01	1.65	0.02	0.15	0.05	0.4	0.22	0.05	0	0.1	0.11	0.16	5.12	5.89	0	6.99	3.99	4.99	3.84	0.56	0	0.18	0.16	1.7	0	1.11	4.5	2.02	8.86	87.61	0.35	0.03	2.88	0.13	0.73	6.04	0.23	0	0.32	0.17	0.04	0	0	0
RT10	1.32	0	0.09	0.05	0.1	1.32	0.56	0.11	0.1	1.71	1.75	0.15	0.4	0	0.71	18.4	4.12	0.56	1.28	0.37	0.36	2.88	0.38	0.48	0.68	2.45	0.57	5.22	2.23	70.59	1.09	0.31	1.26	7.6	5.21	0.44	0.91	31.91	0.88	0.26	0.08	0.14	0.05
LC21	2.5	0	0.99	1.48	0.1	6.06	26.02	3.29	39.02	0.13	0.22	0.5	1.83	0	2.57	0.65	2.56	8.66	10.07	0.77	1	26.81	1.7	0.59	0.06	1.43	0.73	1.66	0.15	1.02	14.11	0.8	0.17	0.14	8.96	0	1.81	3.02	0.13	3.76	0	0.99	0.05
W15	0.42	0.06	0.12	0.16	0.4	3.64	0.73	0.04	0.72	12.84	4.26	0.82	2.23	2.35	0.82	5.78	9.59	0.56	2.48	0.37	1.68	0.24	1.1	0.35	37.86	2.91	2.19	1.74	0.2	1.48	1.07	1.96	16.03	3.52	5.94	1.67	0.52	2.01	0.42	0.74	0.11	0.33	0.09
RT15	0.59	0.02	0.17	1.31	0.5	26.57	1.17	0	1.43	65.05	0.32	2.02	3.9	2.07	1.91	0.41	0.92	0.89	4.16	0.44	0.05	2.27	0.32	0.82	2.18	0.45	0.49	2.57	0.18	2.12	1.93	4.19	0.2	2.81	1.15	0.28	0.59	4.47	0.88	1.22	0.19	0.61	0.28
LC08	0	0	0	0	1.51	1.1	0.46	0.02	0.2	0.79	1.23	0.79	1.95	0	3.77	0.41	1.49	1.54	2	2.32	8.2	0.49	3.74	15.21	2.42	31.46	12.55	2.85	0.41	1.45	1.14	7.24	7.68	2.25	2.6	0.87	8.64	3.37	2.47	2.01	0.39	1.03	0.52
LC11	0.04	0	0.35	0.05	2.22	1.98	6	0.19	3.58	0.4	0.02	1.02	3.06	0	0.05	0	0.28	7.72	12.71	1.25	0.14	0.81	0.51	3.55	0.06	1.36	0.57	3.72	0.15	6.91	7.96	13.16	0	19.16	4.58	4.1	4.81	17.77	7.56	6.73	0.41	1.69	0.52
LC18	0.13	0.02	0.23	0	1.31	0	2.28	0.09	0.41	0	3.79	0.91	1.75	33.06	2.84	0.49	5.89	0.33	6.95	1.43	16.3	0.28	12.6	0.4	7.32	14.39	33.44	1.23	0.03	0.35	2.33	1.16	20.65	0.28	12.4	0	2.05	0.78	0.5	6.38	0.06	3.06	0.8
W04	0.13	0	0.06	0.05	1.61	0.44	3.8	0.34	4.19	0.92	0.16	0.12	0.6	0	7.26	0.08	0.55	1.87	3.28	8.27	0	0.69	0.03	16.93	0.04	0.67	0	6.09	0.09	2.72	14.53	6.19	0.2	3.4	1.35	0.71	26.18	3.57	0.96	6.95	0.22	2.77	1.13
LC03	0.08	0	0	0.05	3.02	0	1.95	0.79	0.31	0.04	0.1	0.15	0.28	0	9.83	0.33	1.2	1.73	2	48.53	0.23	0.97	0.48	28.38	0.11	1.76	0.49	2.89	0.44	0.78	6.2	1.47	0	0.76	0	0.11	5.08	1.2	0.79	4.33	0.58	5.03	1.46
LC09	0.04	0.02	0	0	27.82	0.11	2.63	0.09	4.19	0.04	0	0.64	2.71	0	14.8	0	0.09	0.42	8.39	2.46	0	0	0.22	4.76	0.02	0.29	0.32	4.39	0	0.53	9.11	14.51	0	1.32	4.9	0.44	38.65	1.33	1.13	18.04	0.19	4.04	1.7
LC10	0	0	0	0	0.2	0	0.61	0.02	0.51	0.31	0	0.09	0.92	0	0	0	0.26	0	4.08	0.92	0	0	0.16	0.66	0	0.48	0.08	1.5	0	2.19	0.78	2.47	0	33.03	0.31	32.76	0.49	7.52	27.83	13.98	4.36	4.47	0.85
RT07	0.04	0	0.06	0	0	0	0.13	0.02	0	0.02	0.02	0.06	0.8	0	1.64	0.08	0.02	0	1.52	0.29	0	0	0	0.05	0	0.81	0.4	0.75	0	0.81	0.15	0.06	0	14.88	0.1	19.05	0.03	1.91	40.74	14.46	31.42	14.5	1.7
LC12	0.04	0	0.15	0.05	0.4	0	0.08	0.02	0.1	0.52	0	0.12	0.12	0	0	0	0	0.05	0.96	0	0	0	0	0.11	0	0.21	0.16	1.94	0	0.04	0.03	0.04	0	4.39	0.42	35.4	0	0.45	8.15	2.49	45.34	12.83	19.75
LC02	0	0	0.03	0	0.5	0.11	0.46	0.02	0.72	0.02	0	0.09	0.48	0	0.05	0	0	0.05	0.8	0.51	0	0	0.11	0.44	0.02	0.24	0.16	2.02	0	0.07	0.55	2.23	0.03	2.53	0.83	3.55	0.77	0.58	5.27	8.43	16.23	40	69.89
# >1%	15	5	11	9	14	16	16	7	13	6	16	11	18	10	19	11	18	15	23	9	8	11	15	8	12	17	12	26	5	10	19	20	10	12	22	6	10	15	7	15	4	13	6
# > 5%	8	1	5	2	3	7	5	2	5	3	5	6	7	6	8	6	8	5	7	3	6	4	3	5	3	3	4	7	1	2	8	6	7	4	9	3	4	4	5	7	3	4	2
