# Supplementary figures and images for: Unsupervised machine learning reveals risk stratifying glioblastoma tumor cells
Source: eLife journal article supplement (doi:10.7554/elife.56879), 2020-06-22

Figure 1-figure supplement 1

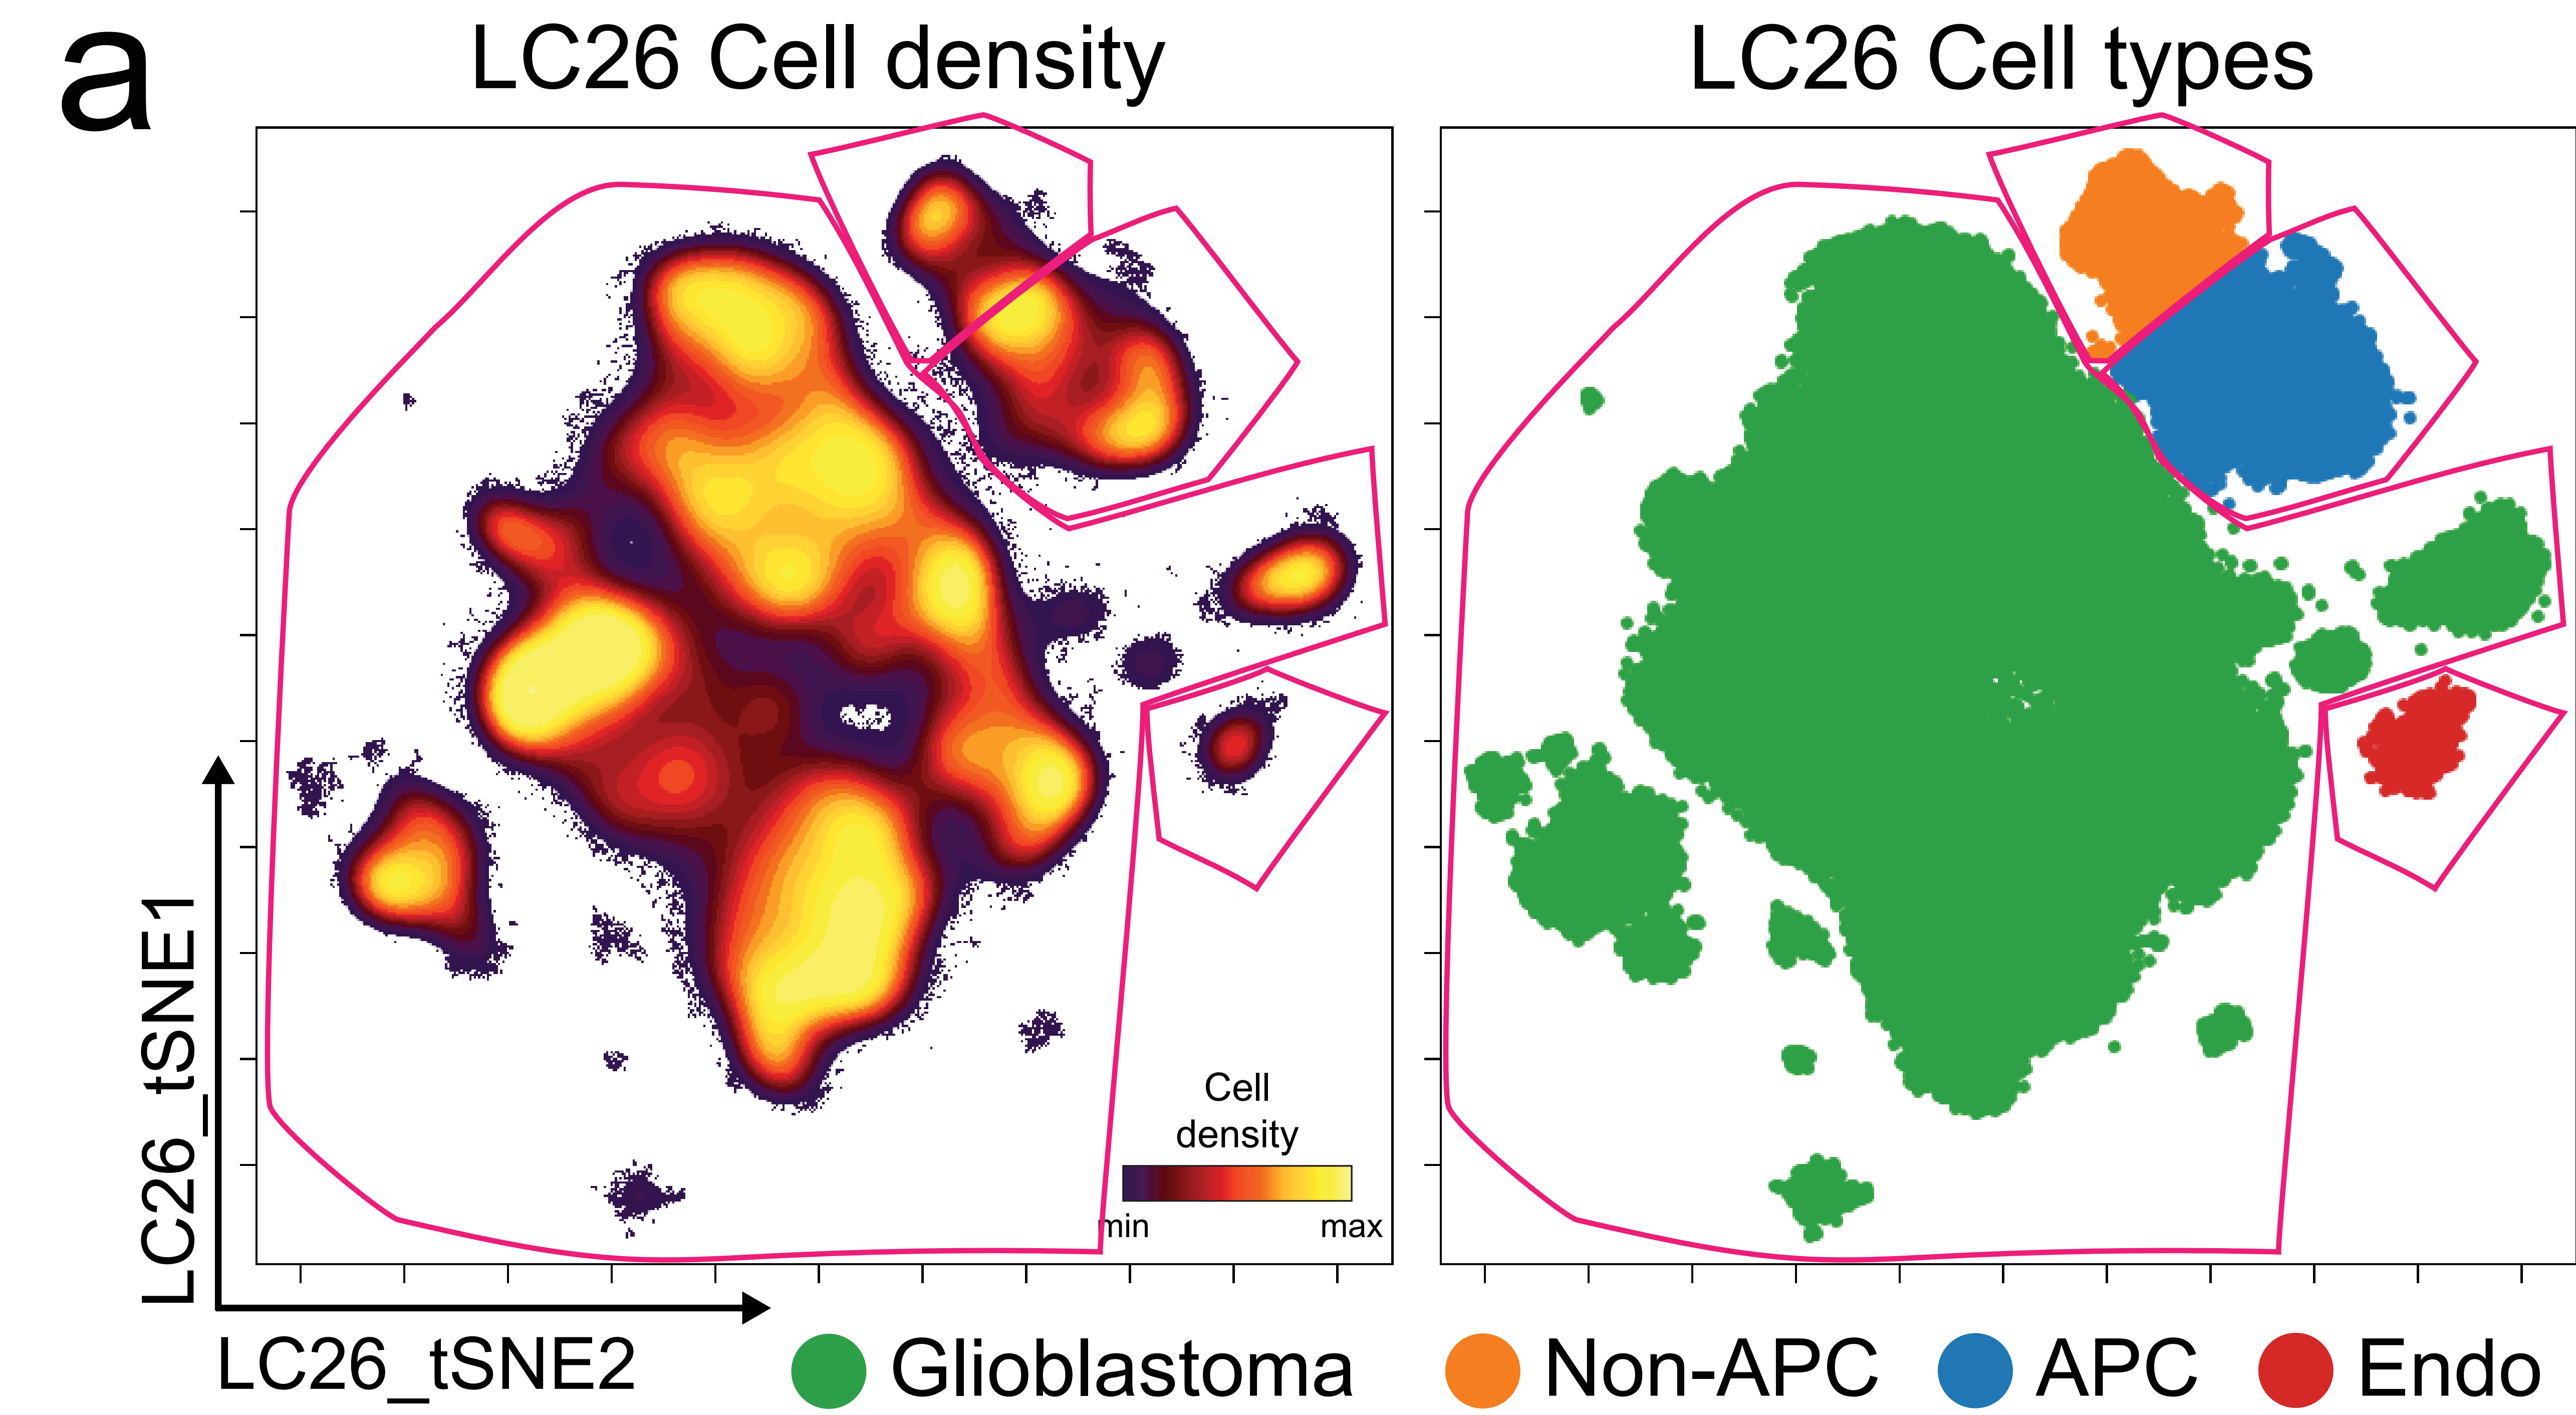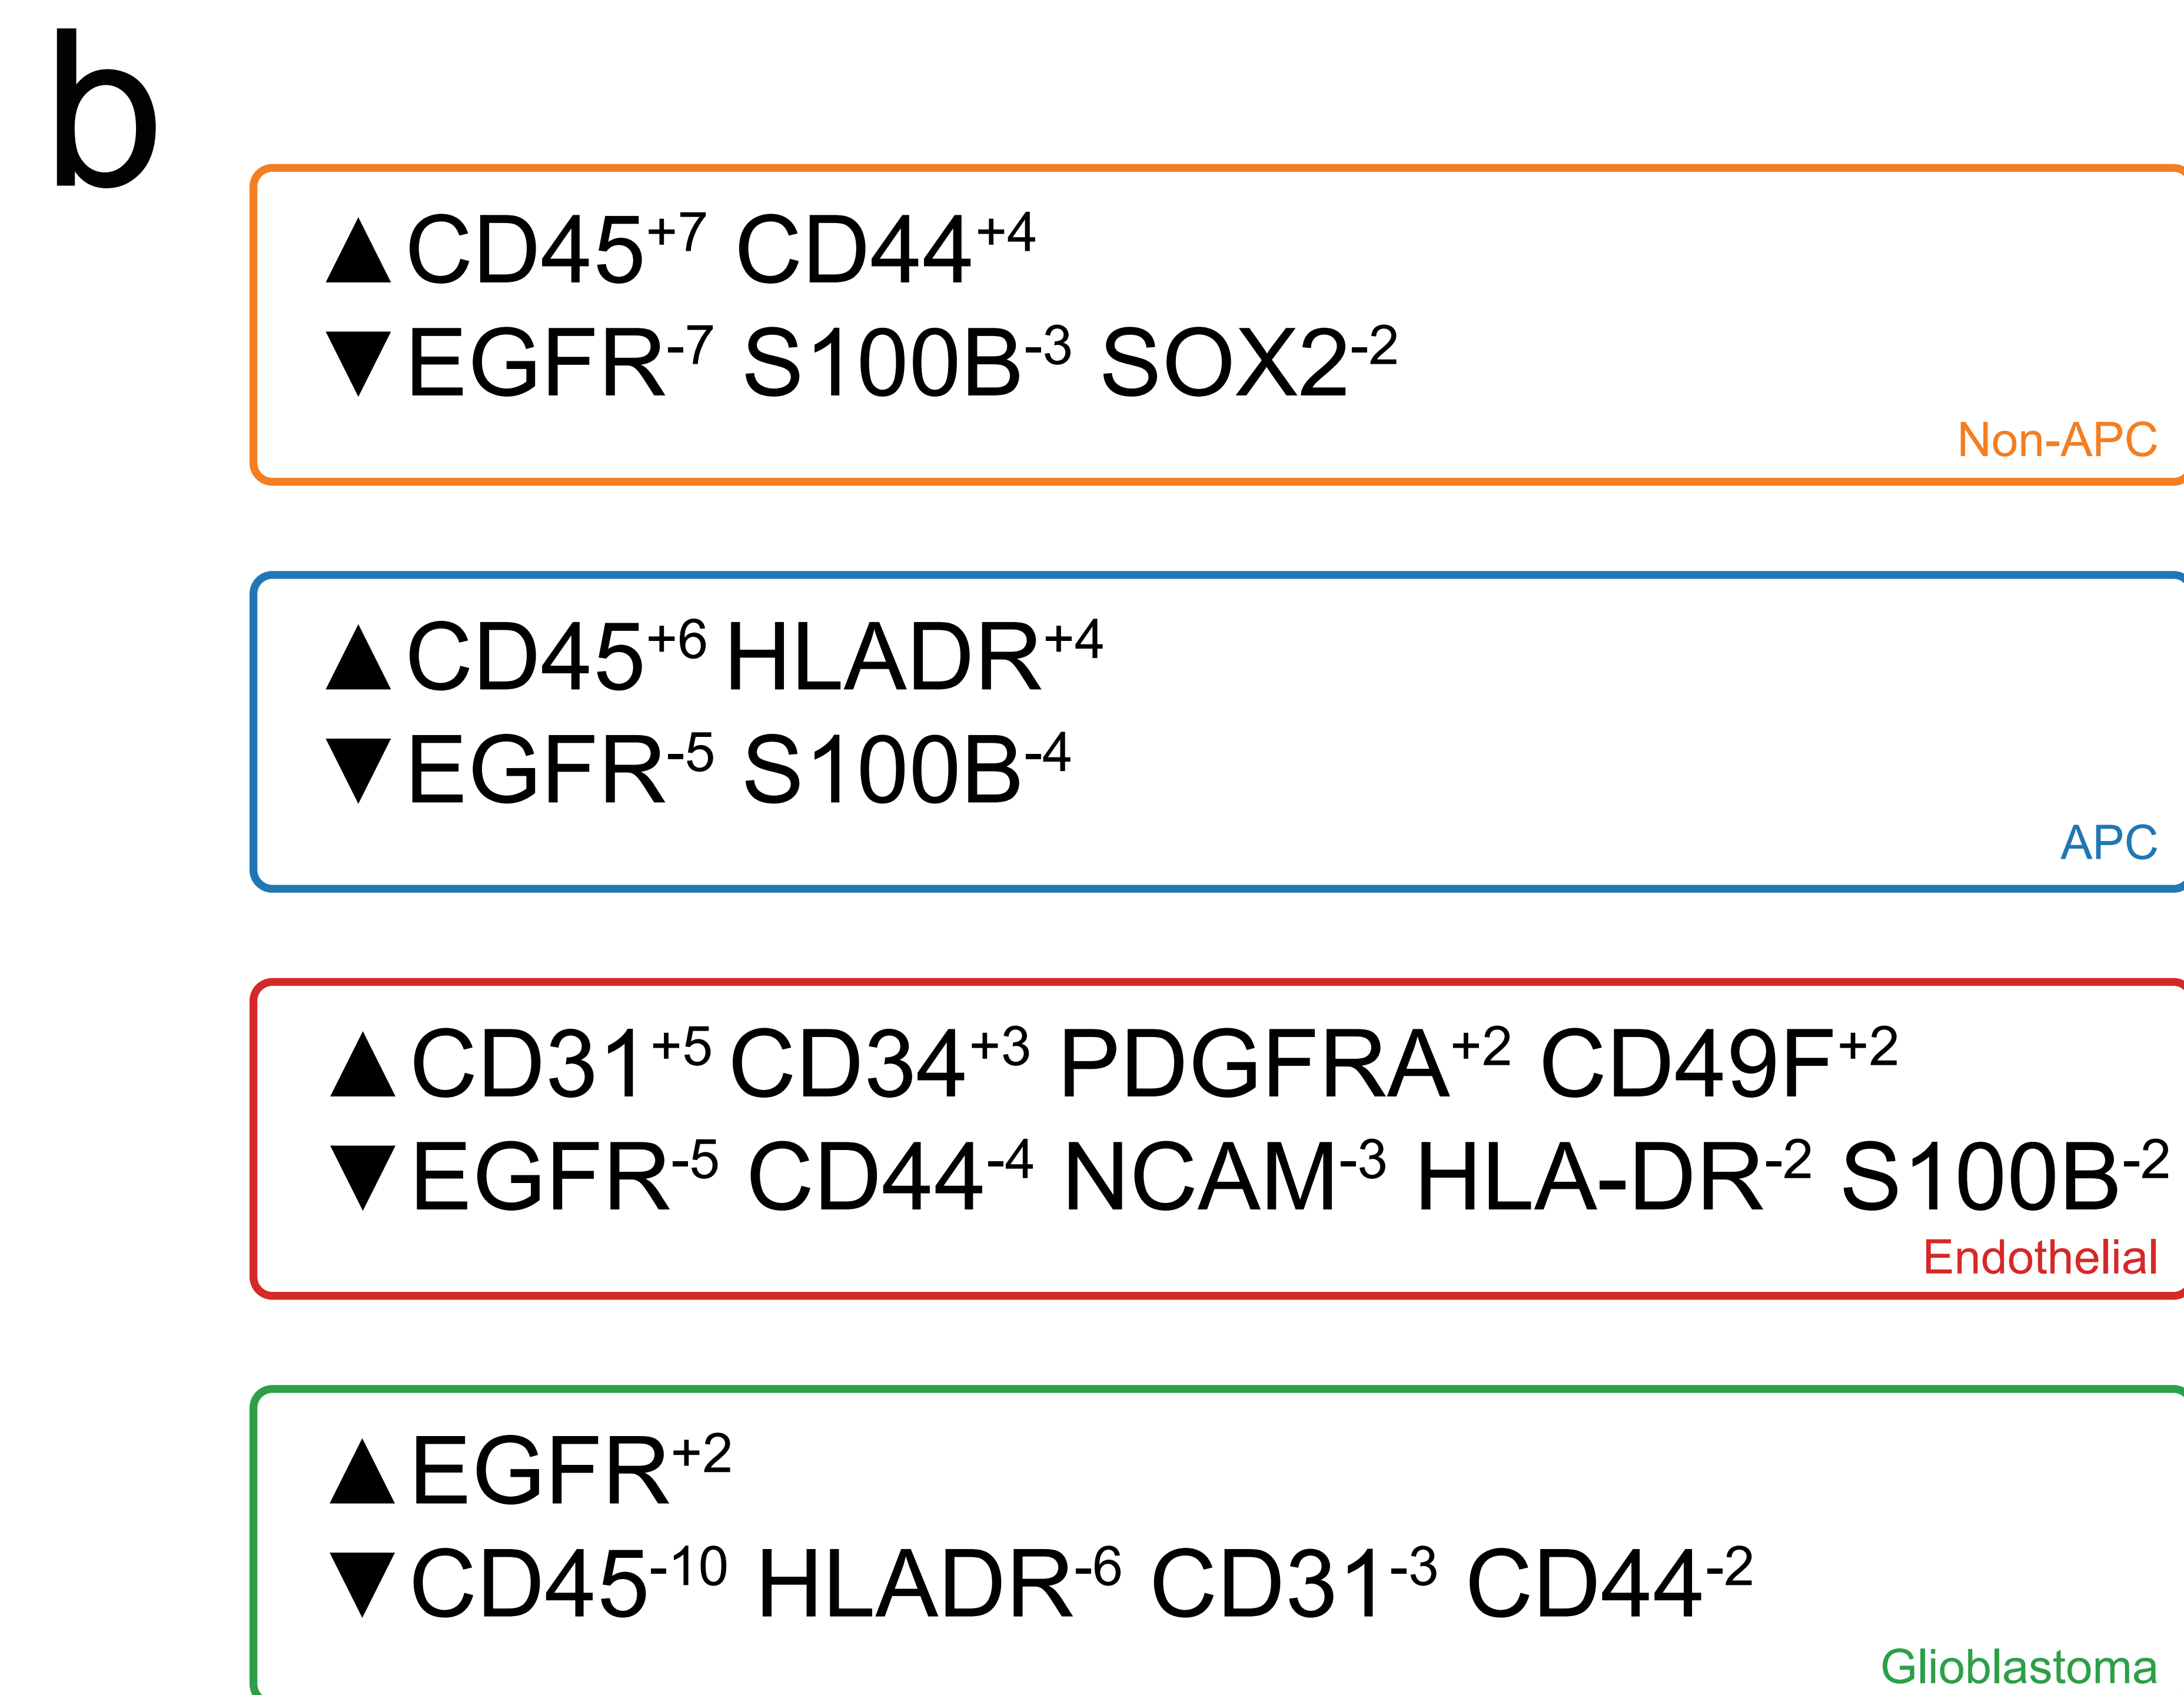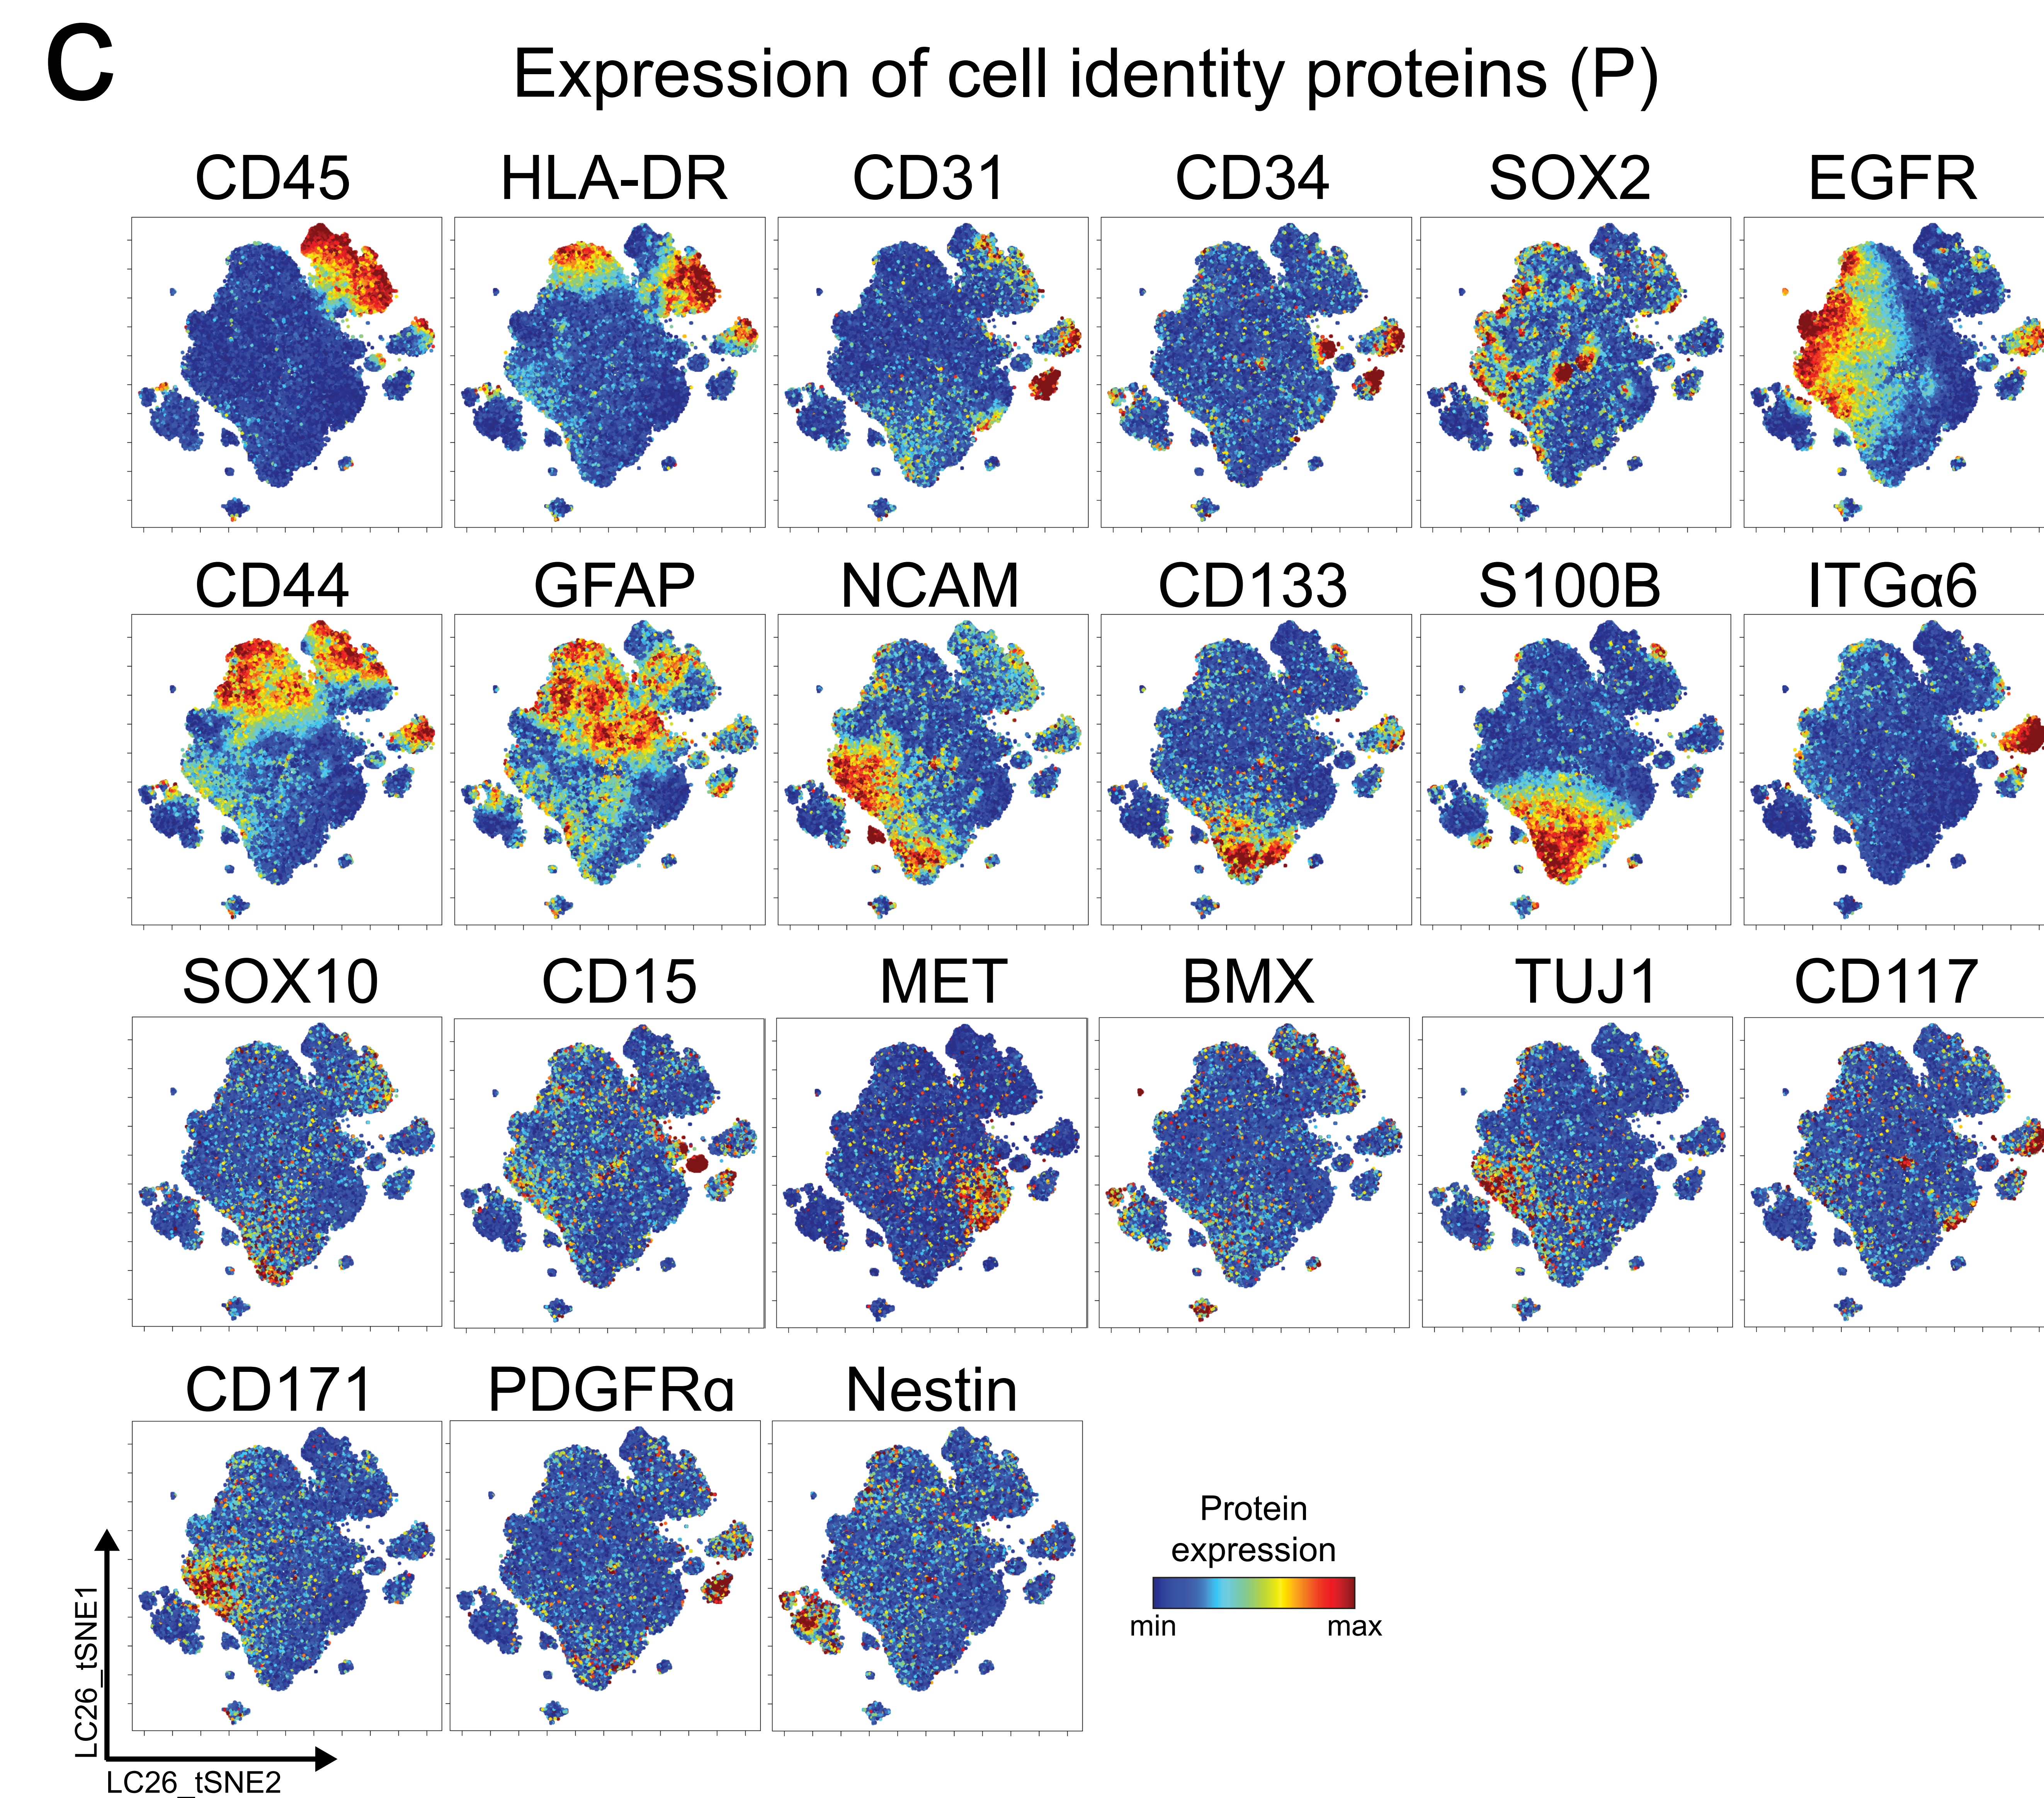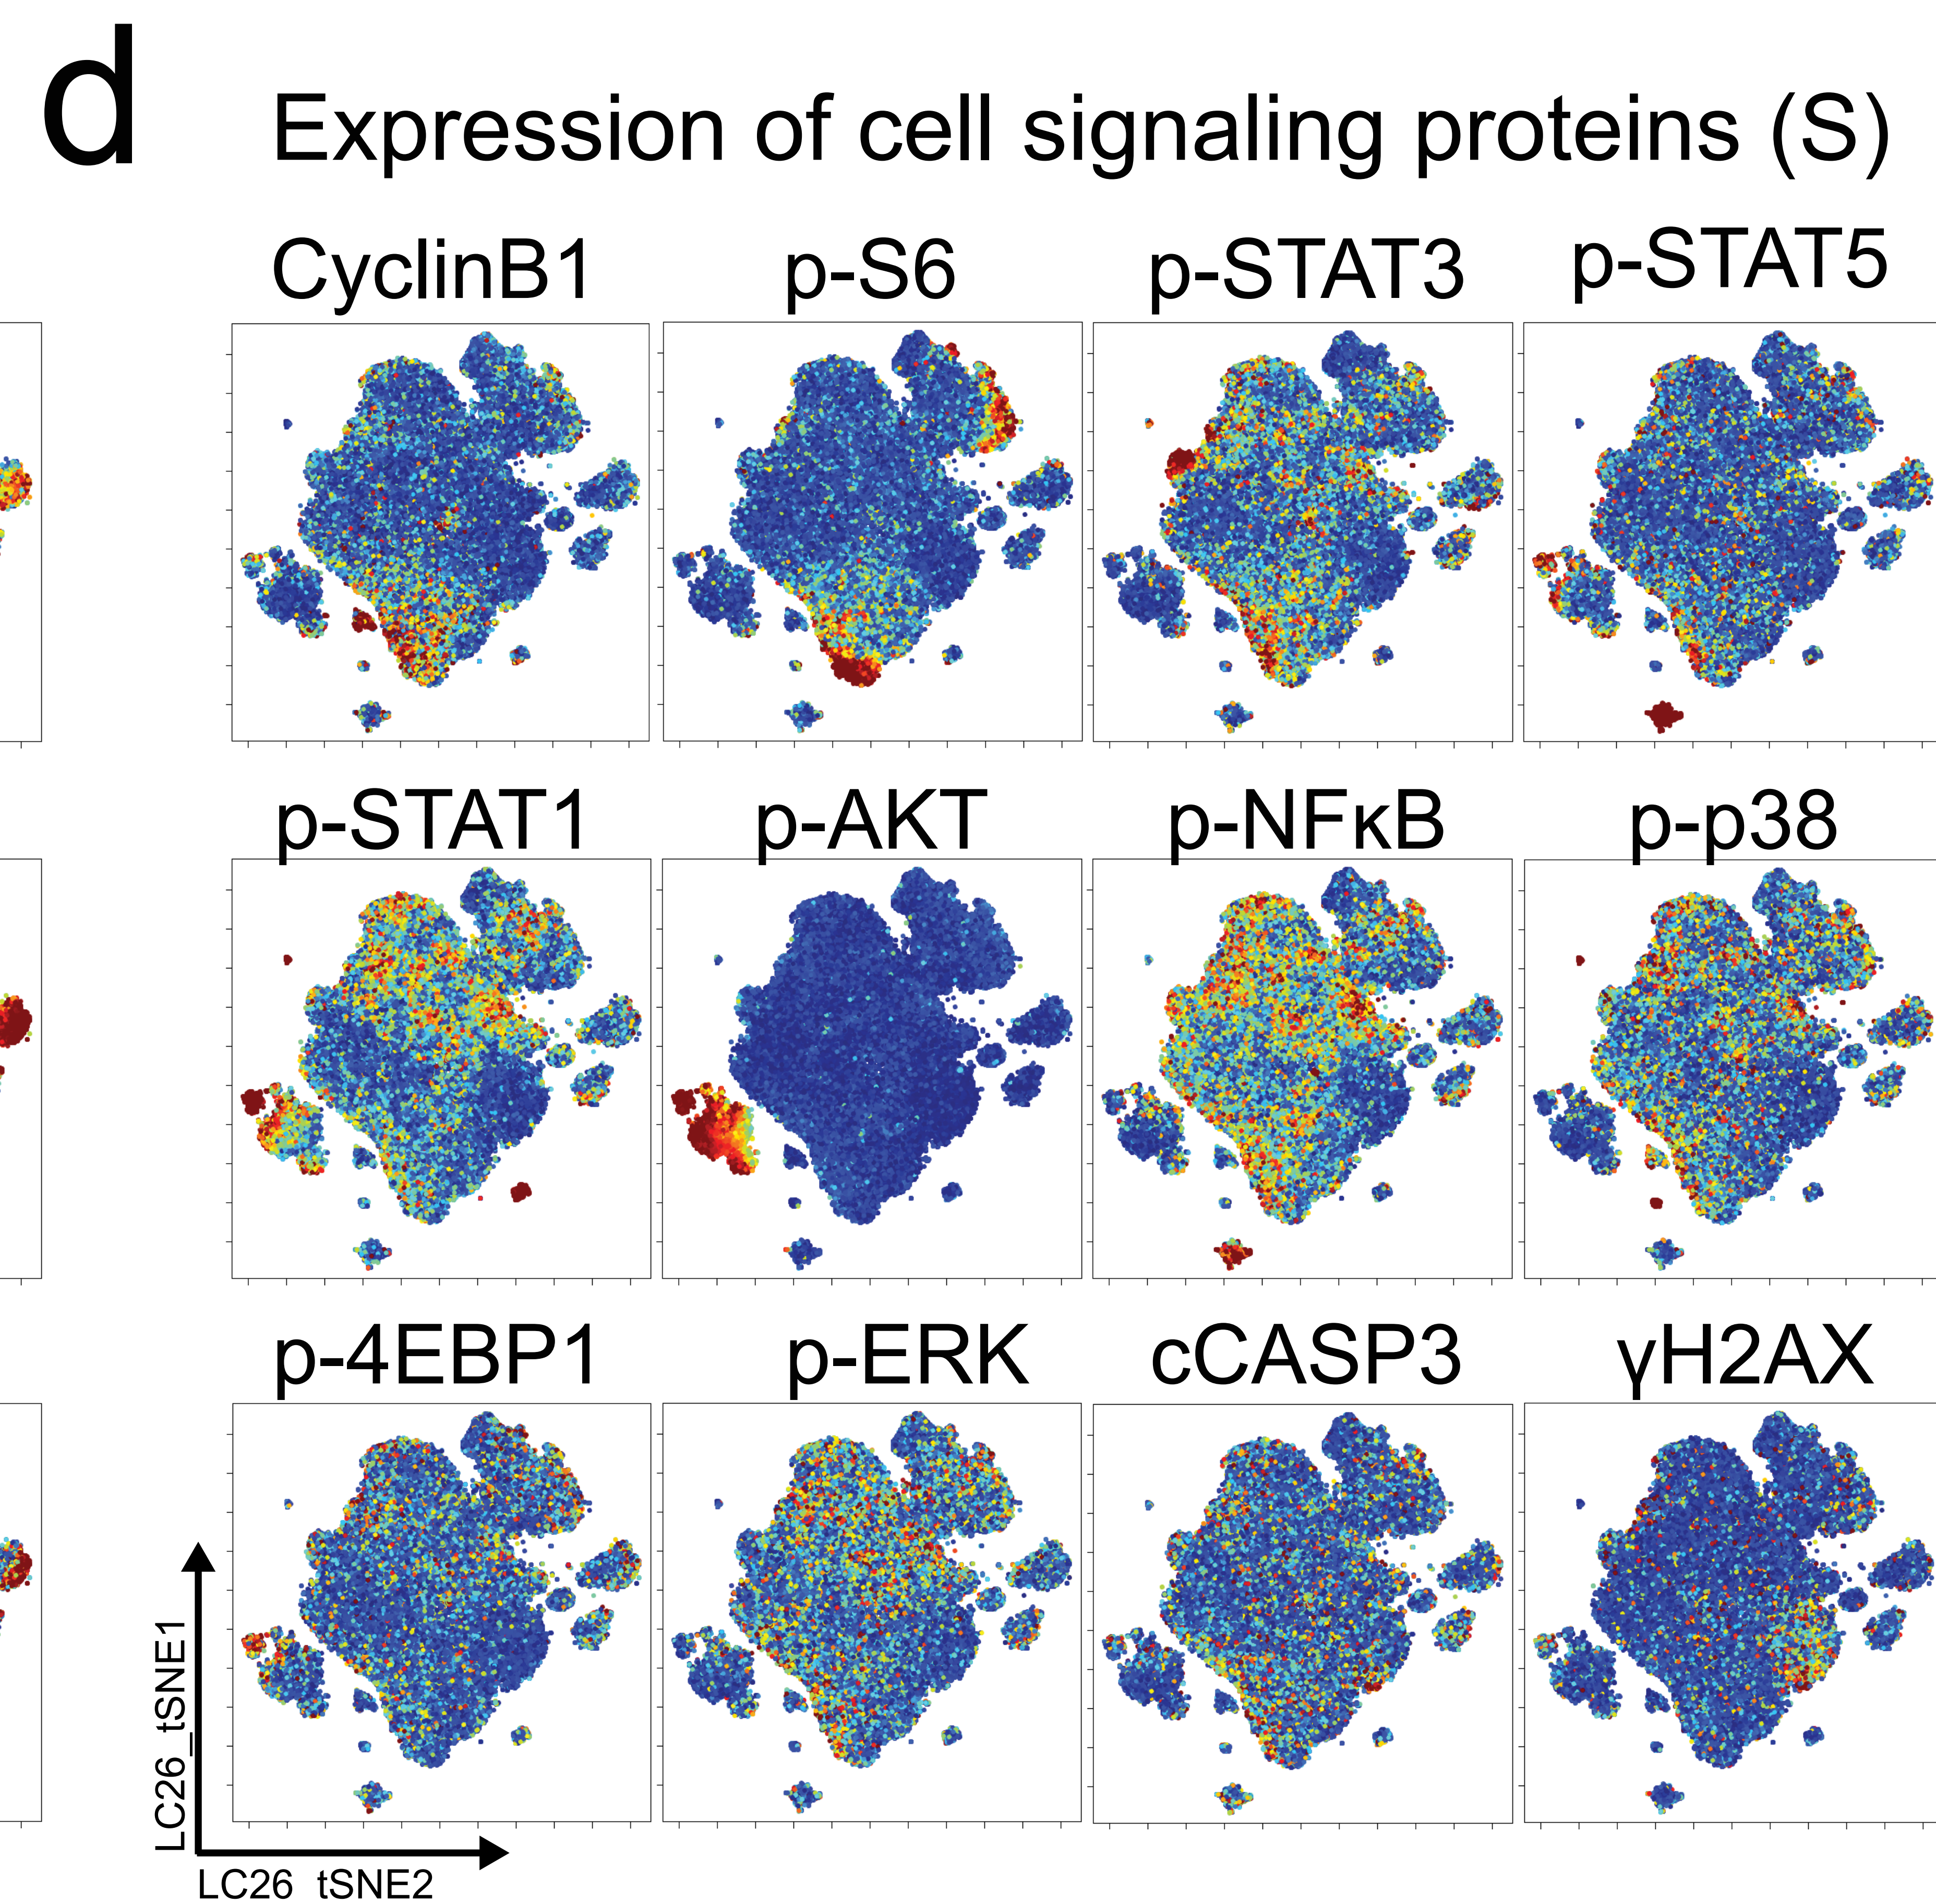

Supplement: supp [file elife-56879-supp-v1.zip]

Figure 1-figure supplement 4

a

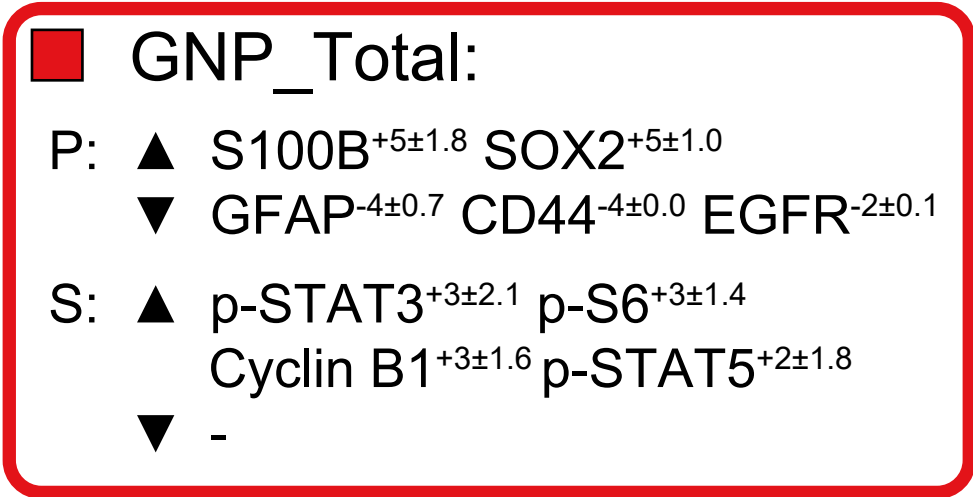

b

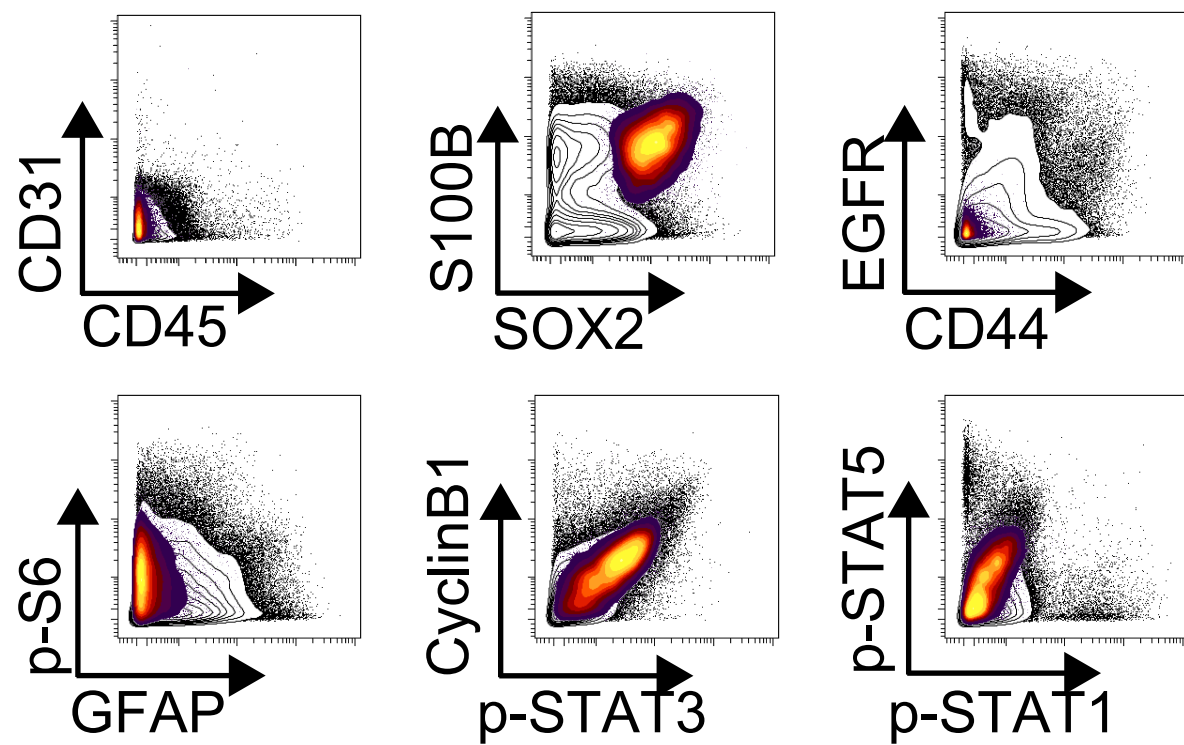

c

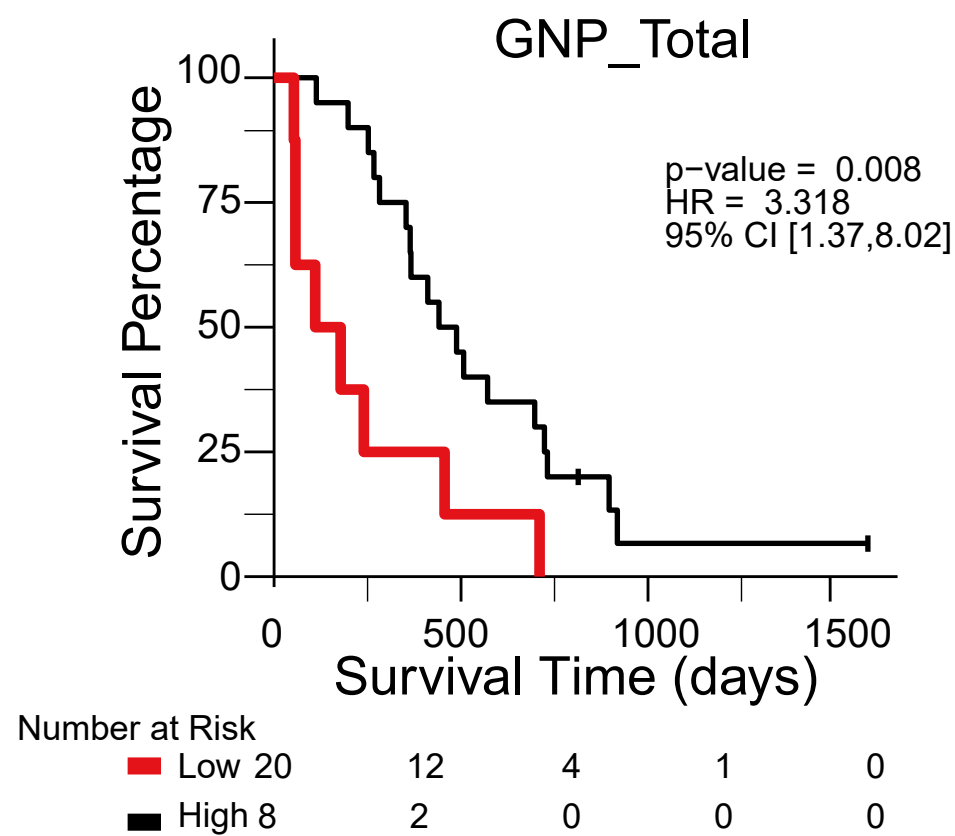

d

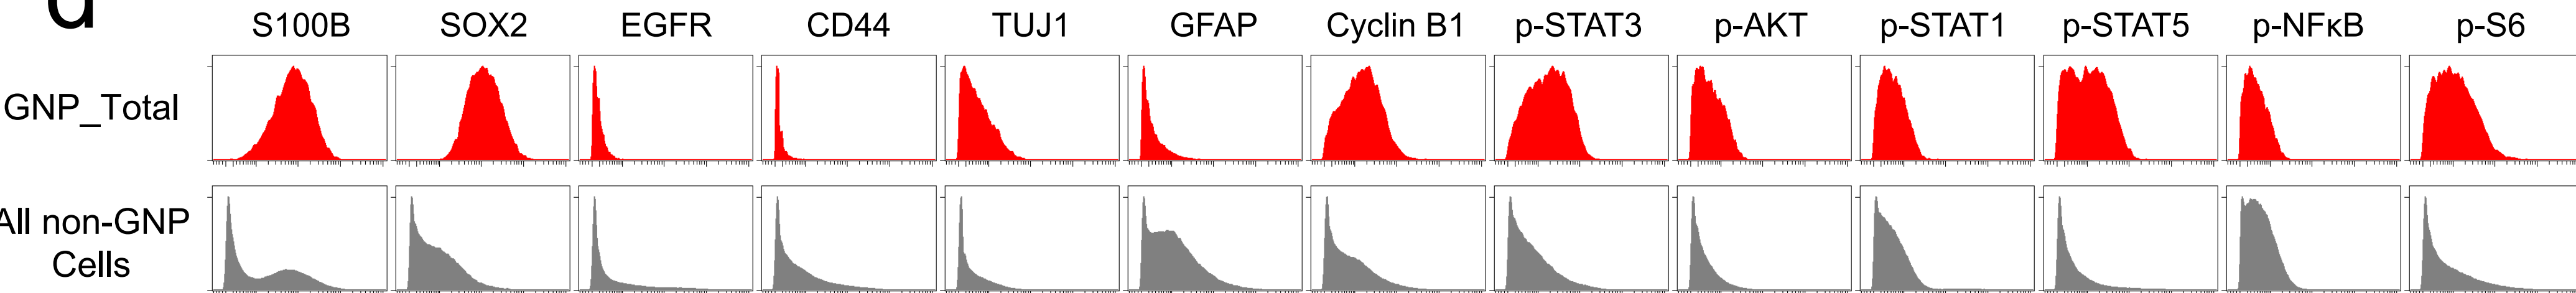

e

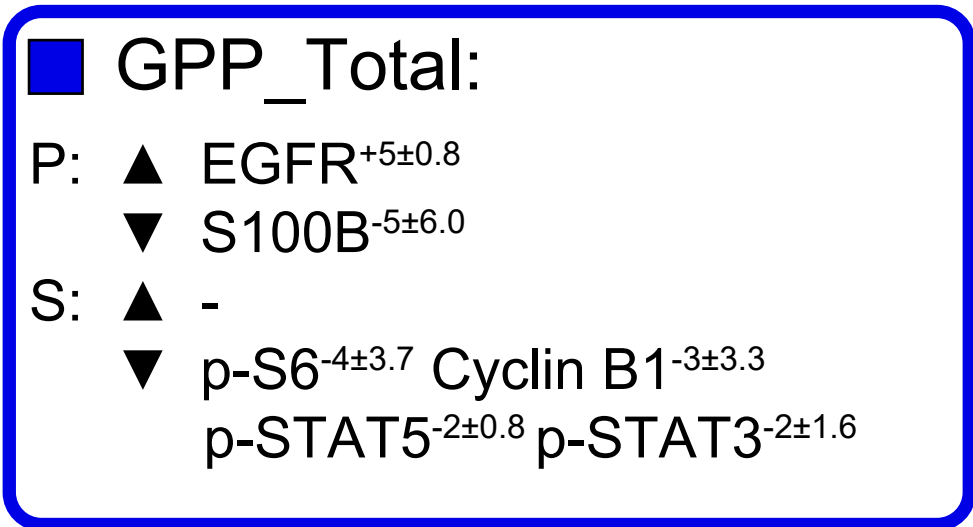

f

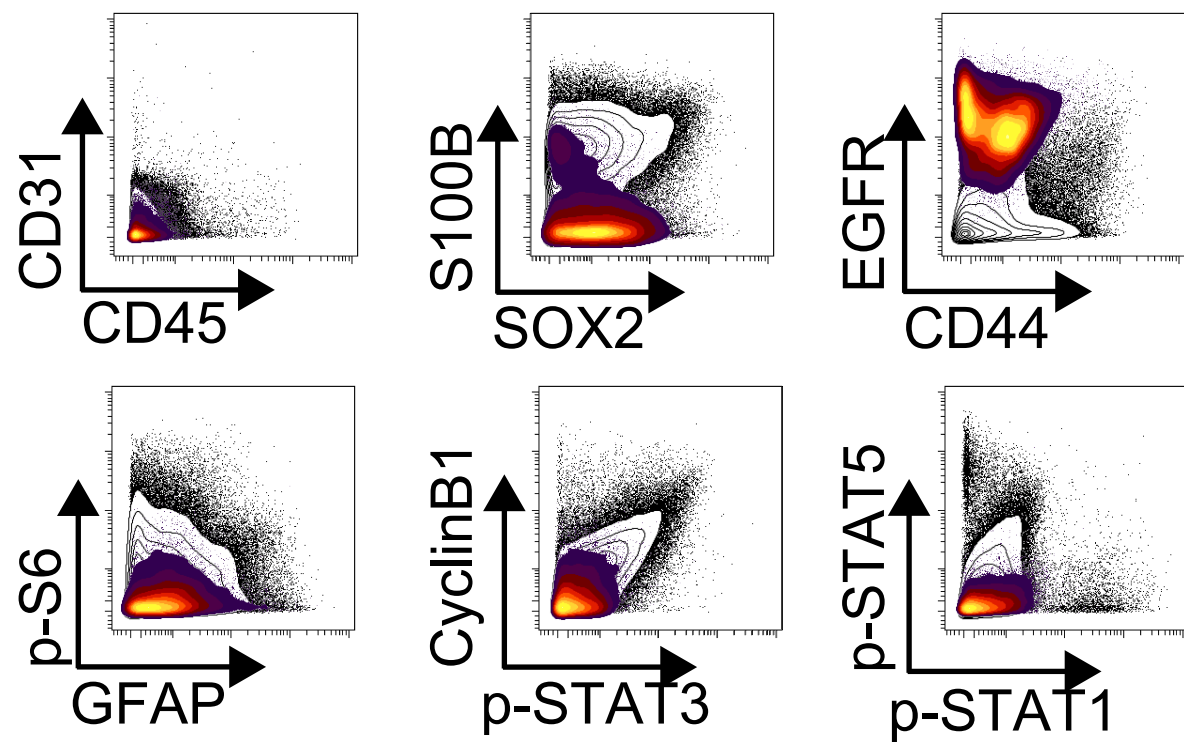

g

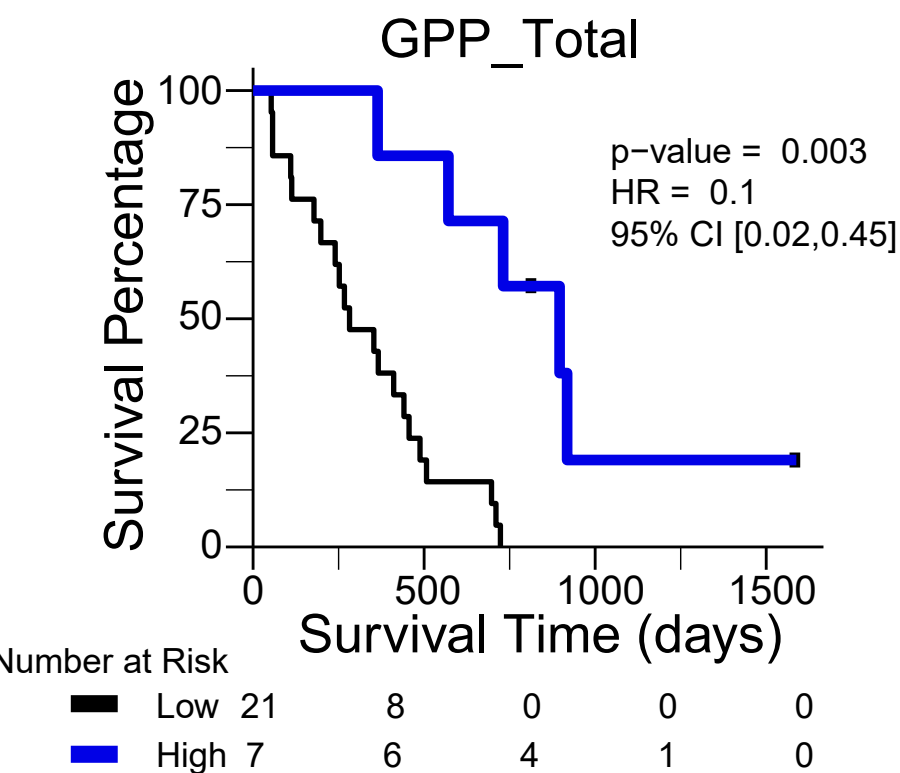

h

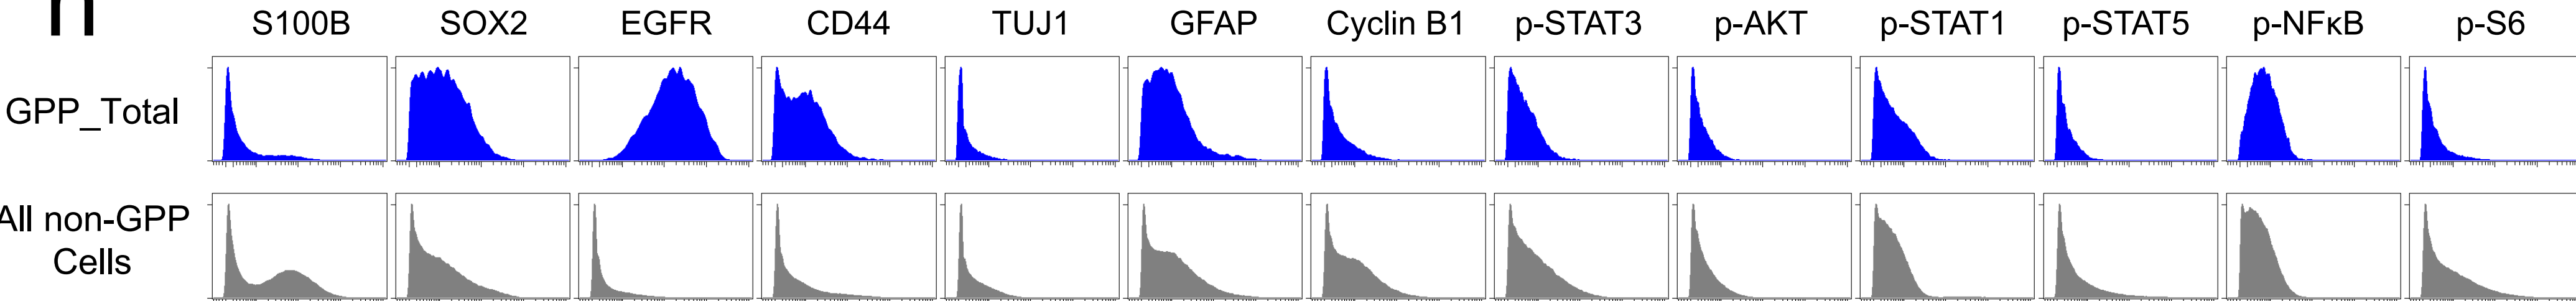

Supplement: supp [file elife-56879-supp-v1.zip]

Figure 1-figure supplement 5

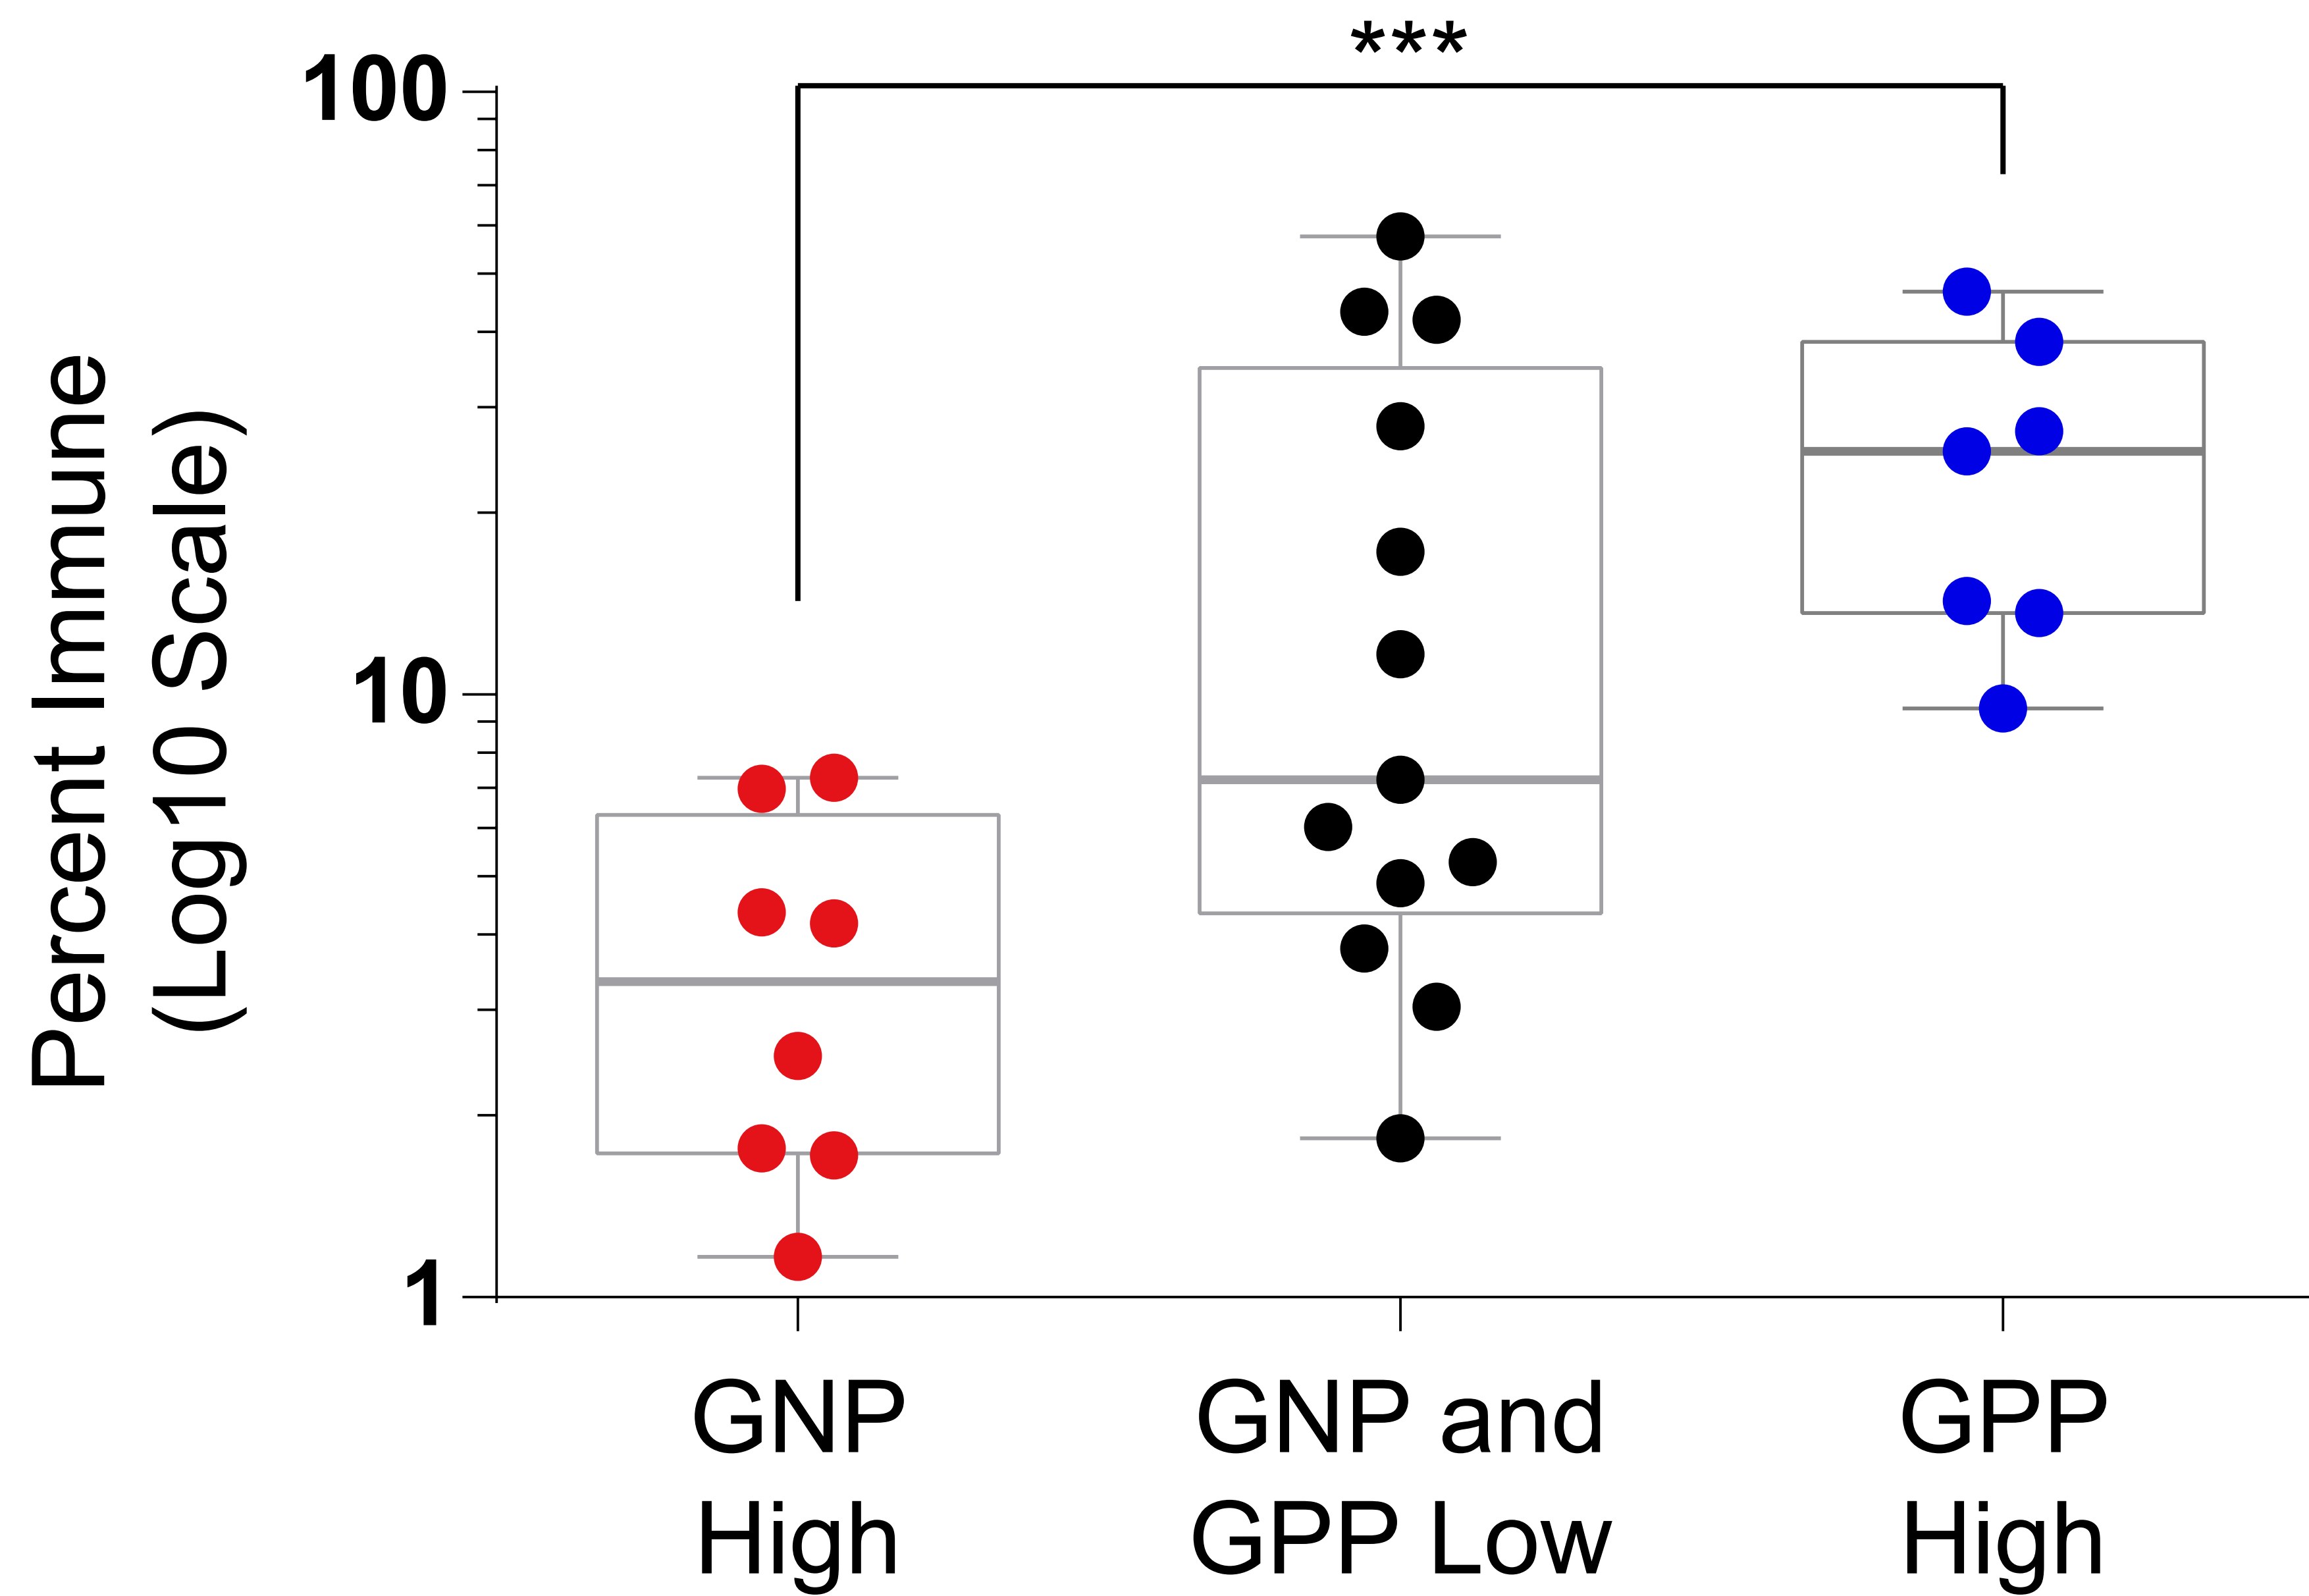

Supplement: supp [file elife-56879-supp-v1.zip]

Figure 1-figure supplement 6

**a**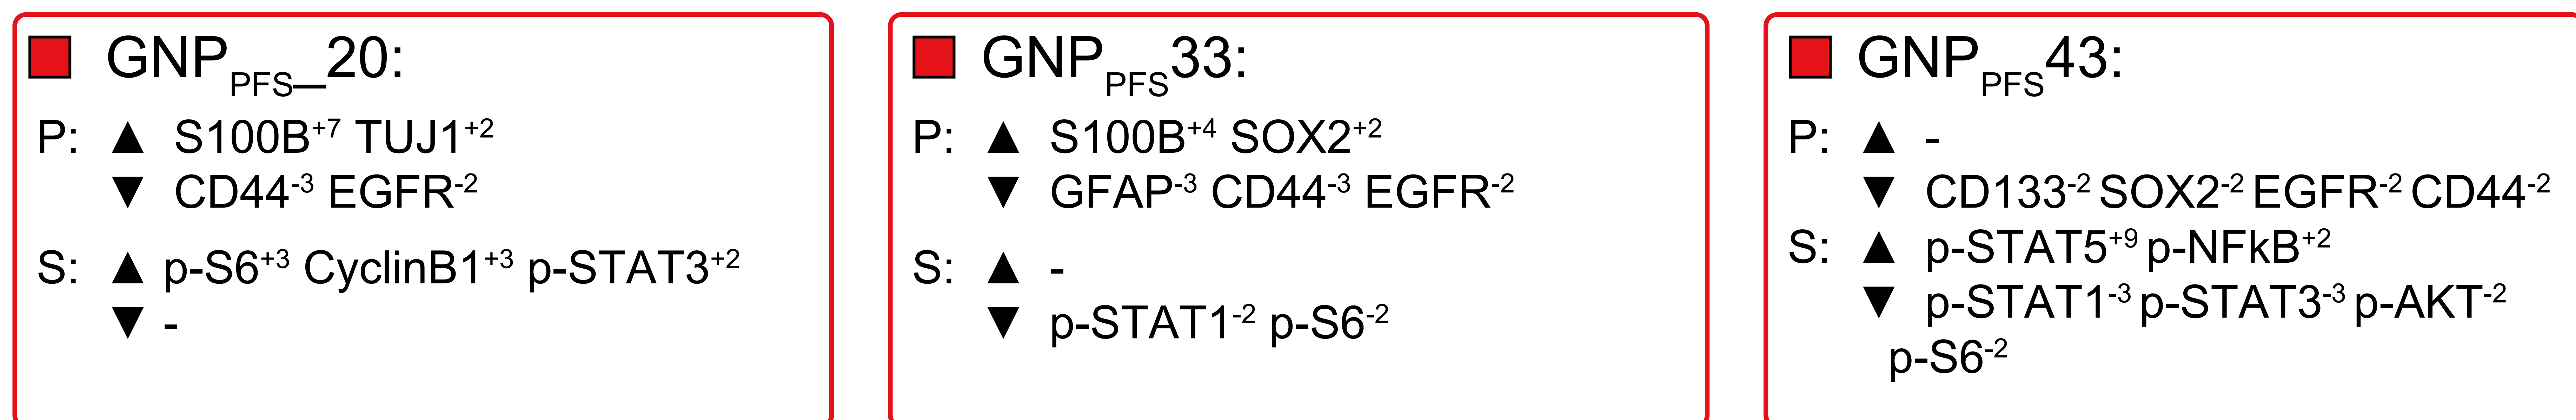**b**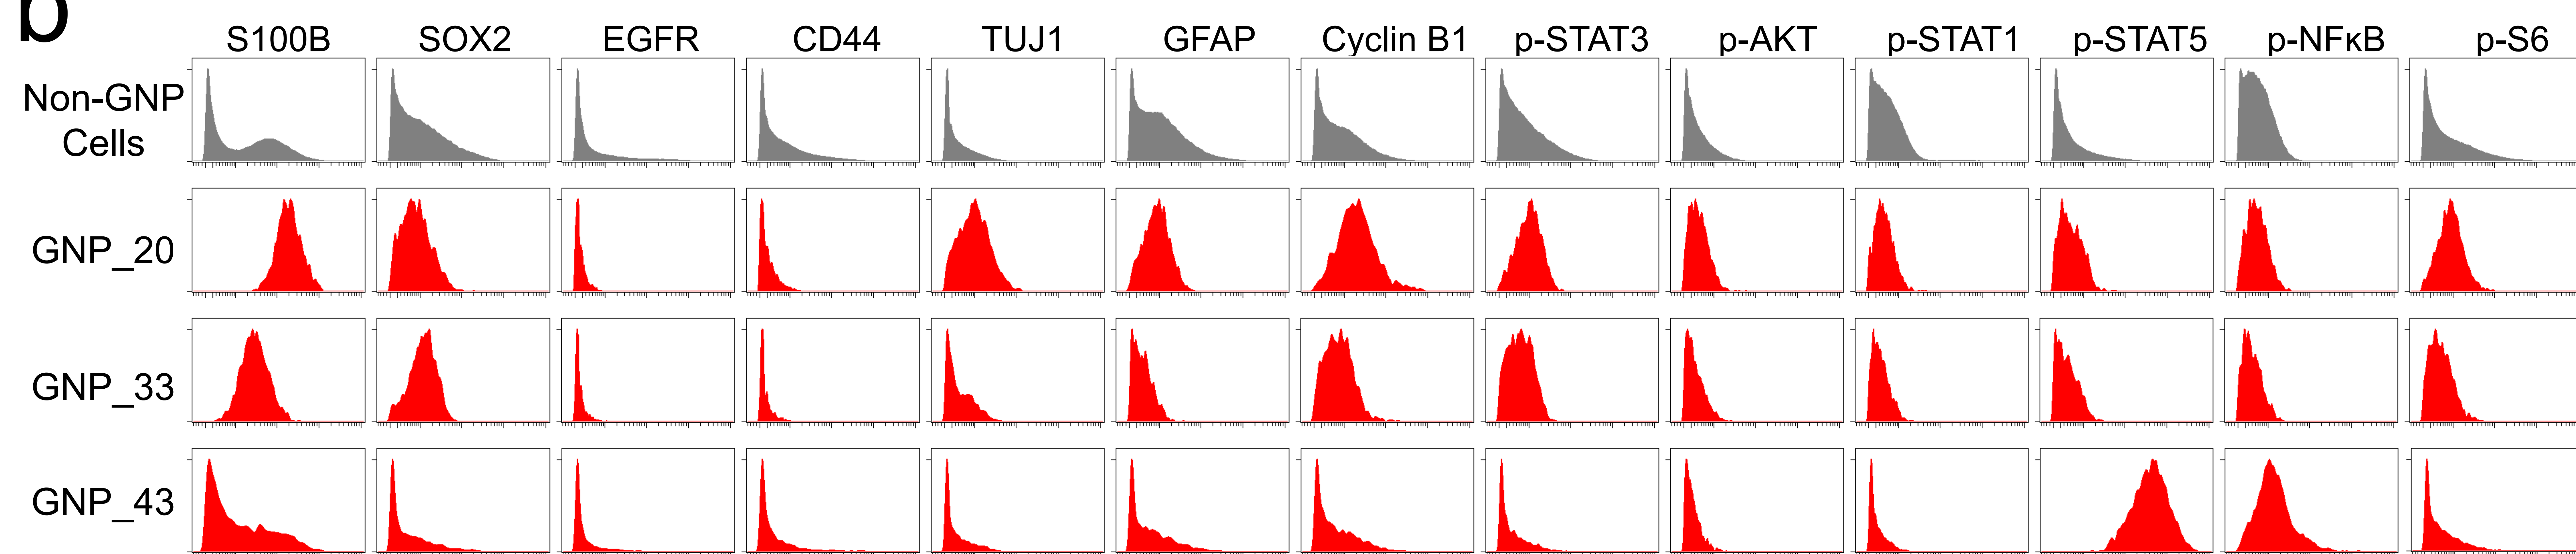**c**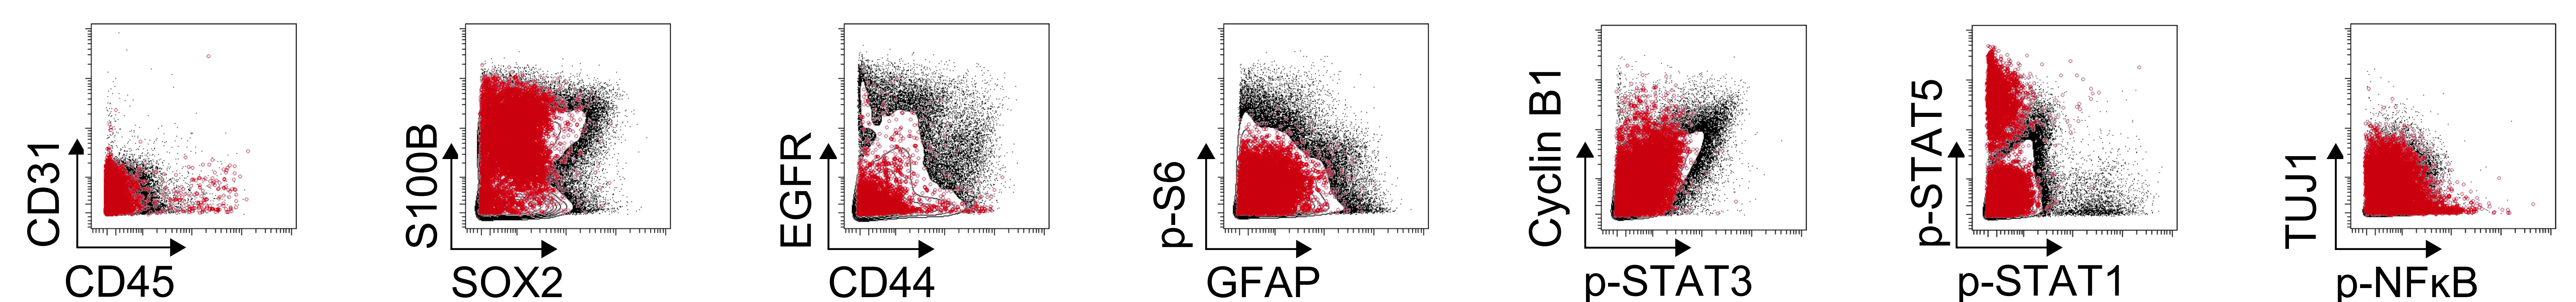**d**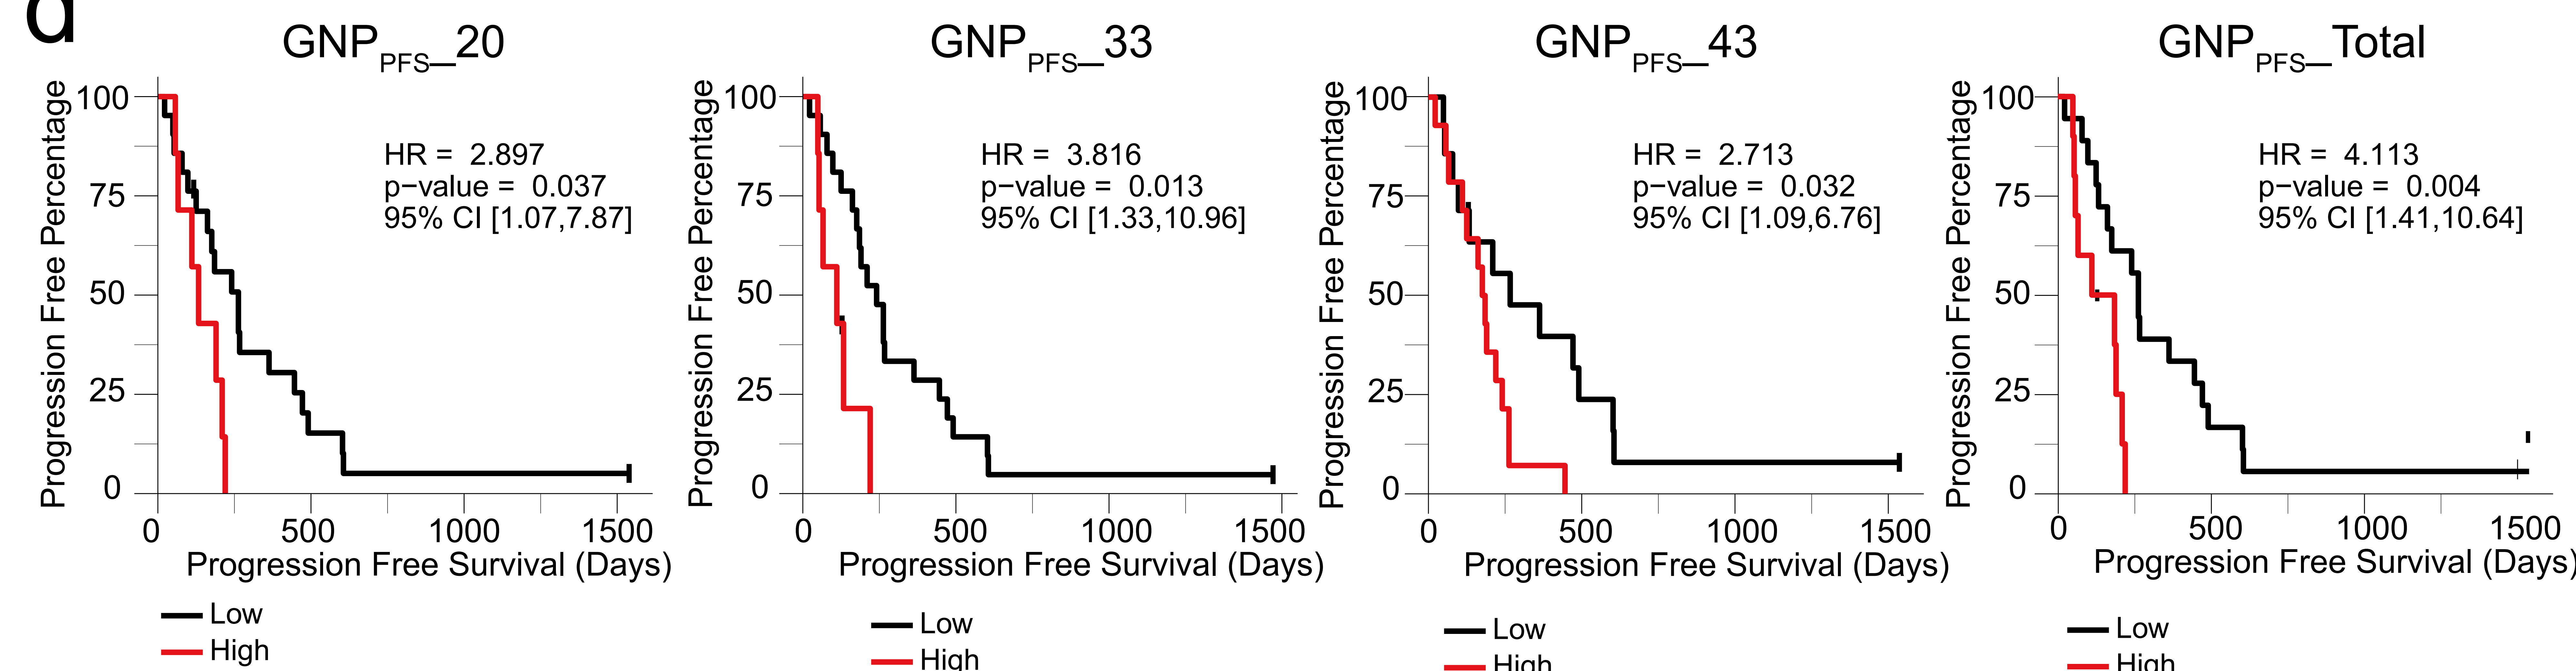**e**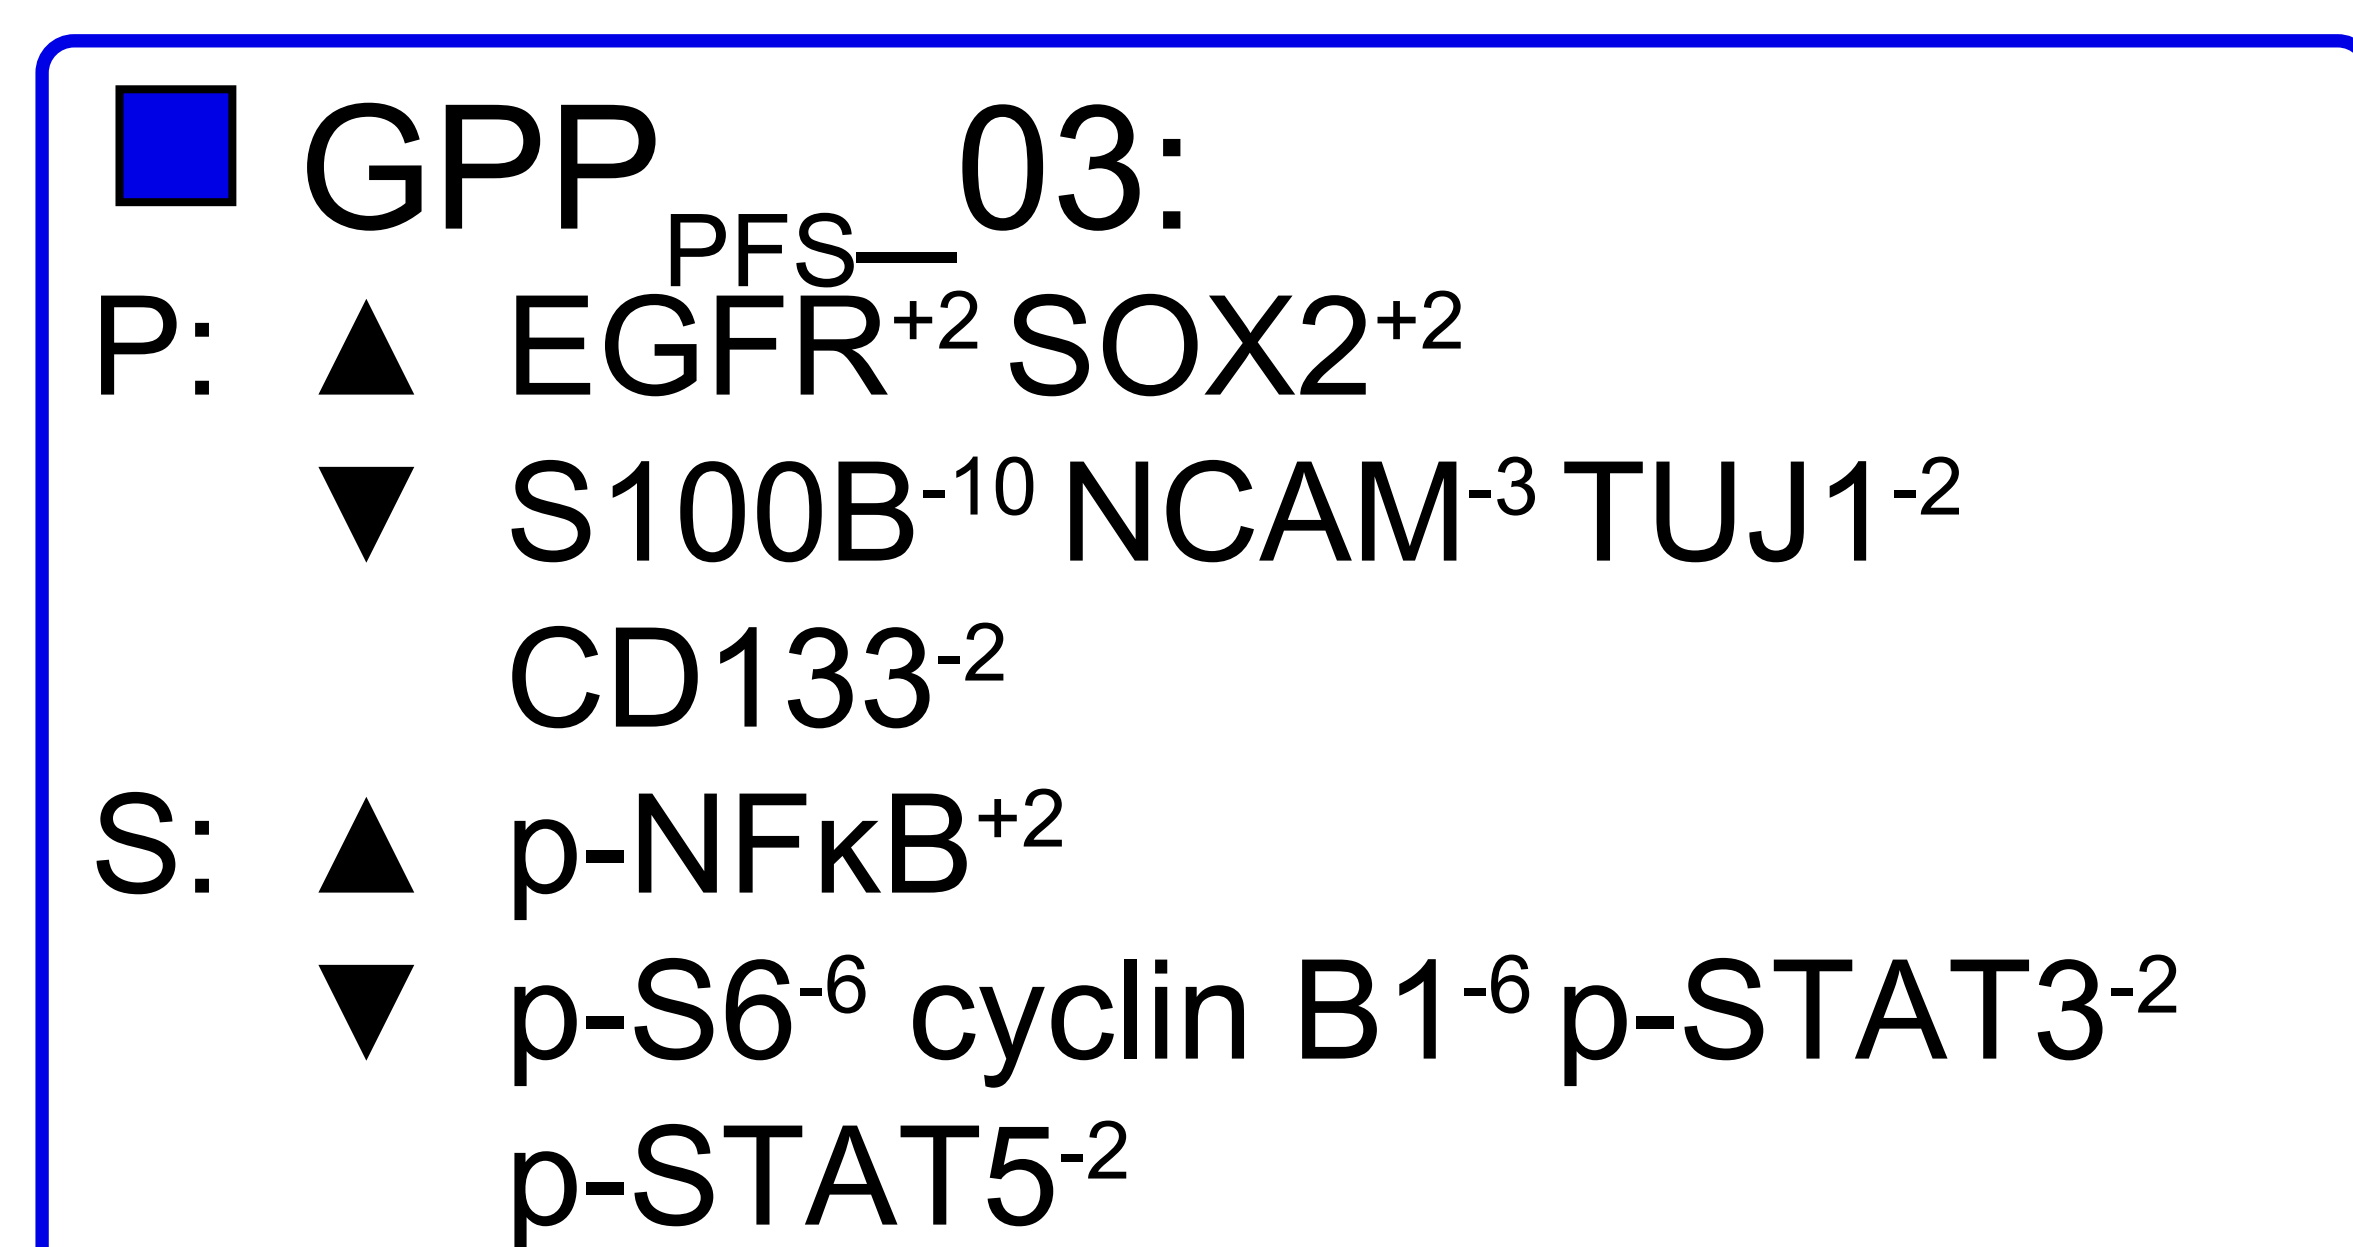**f**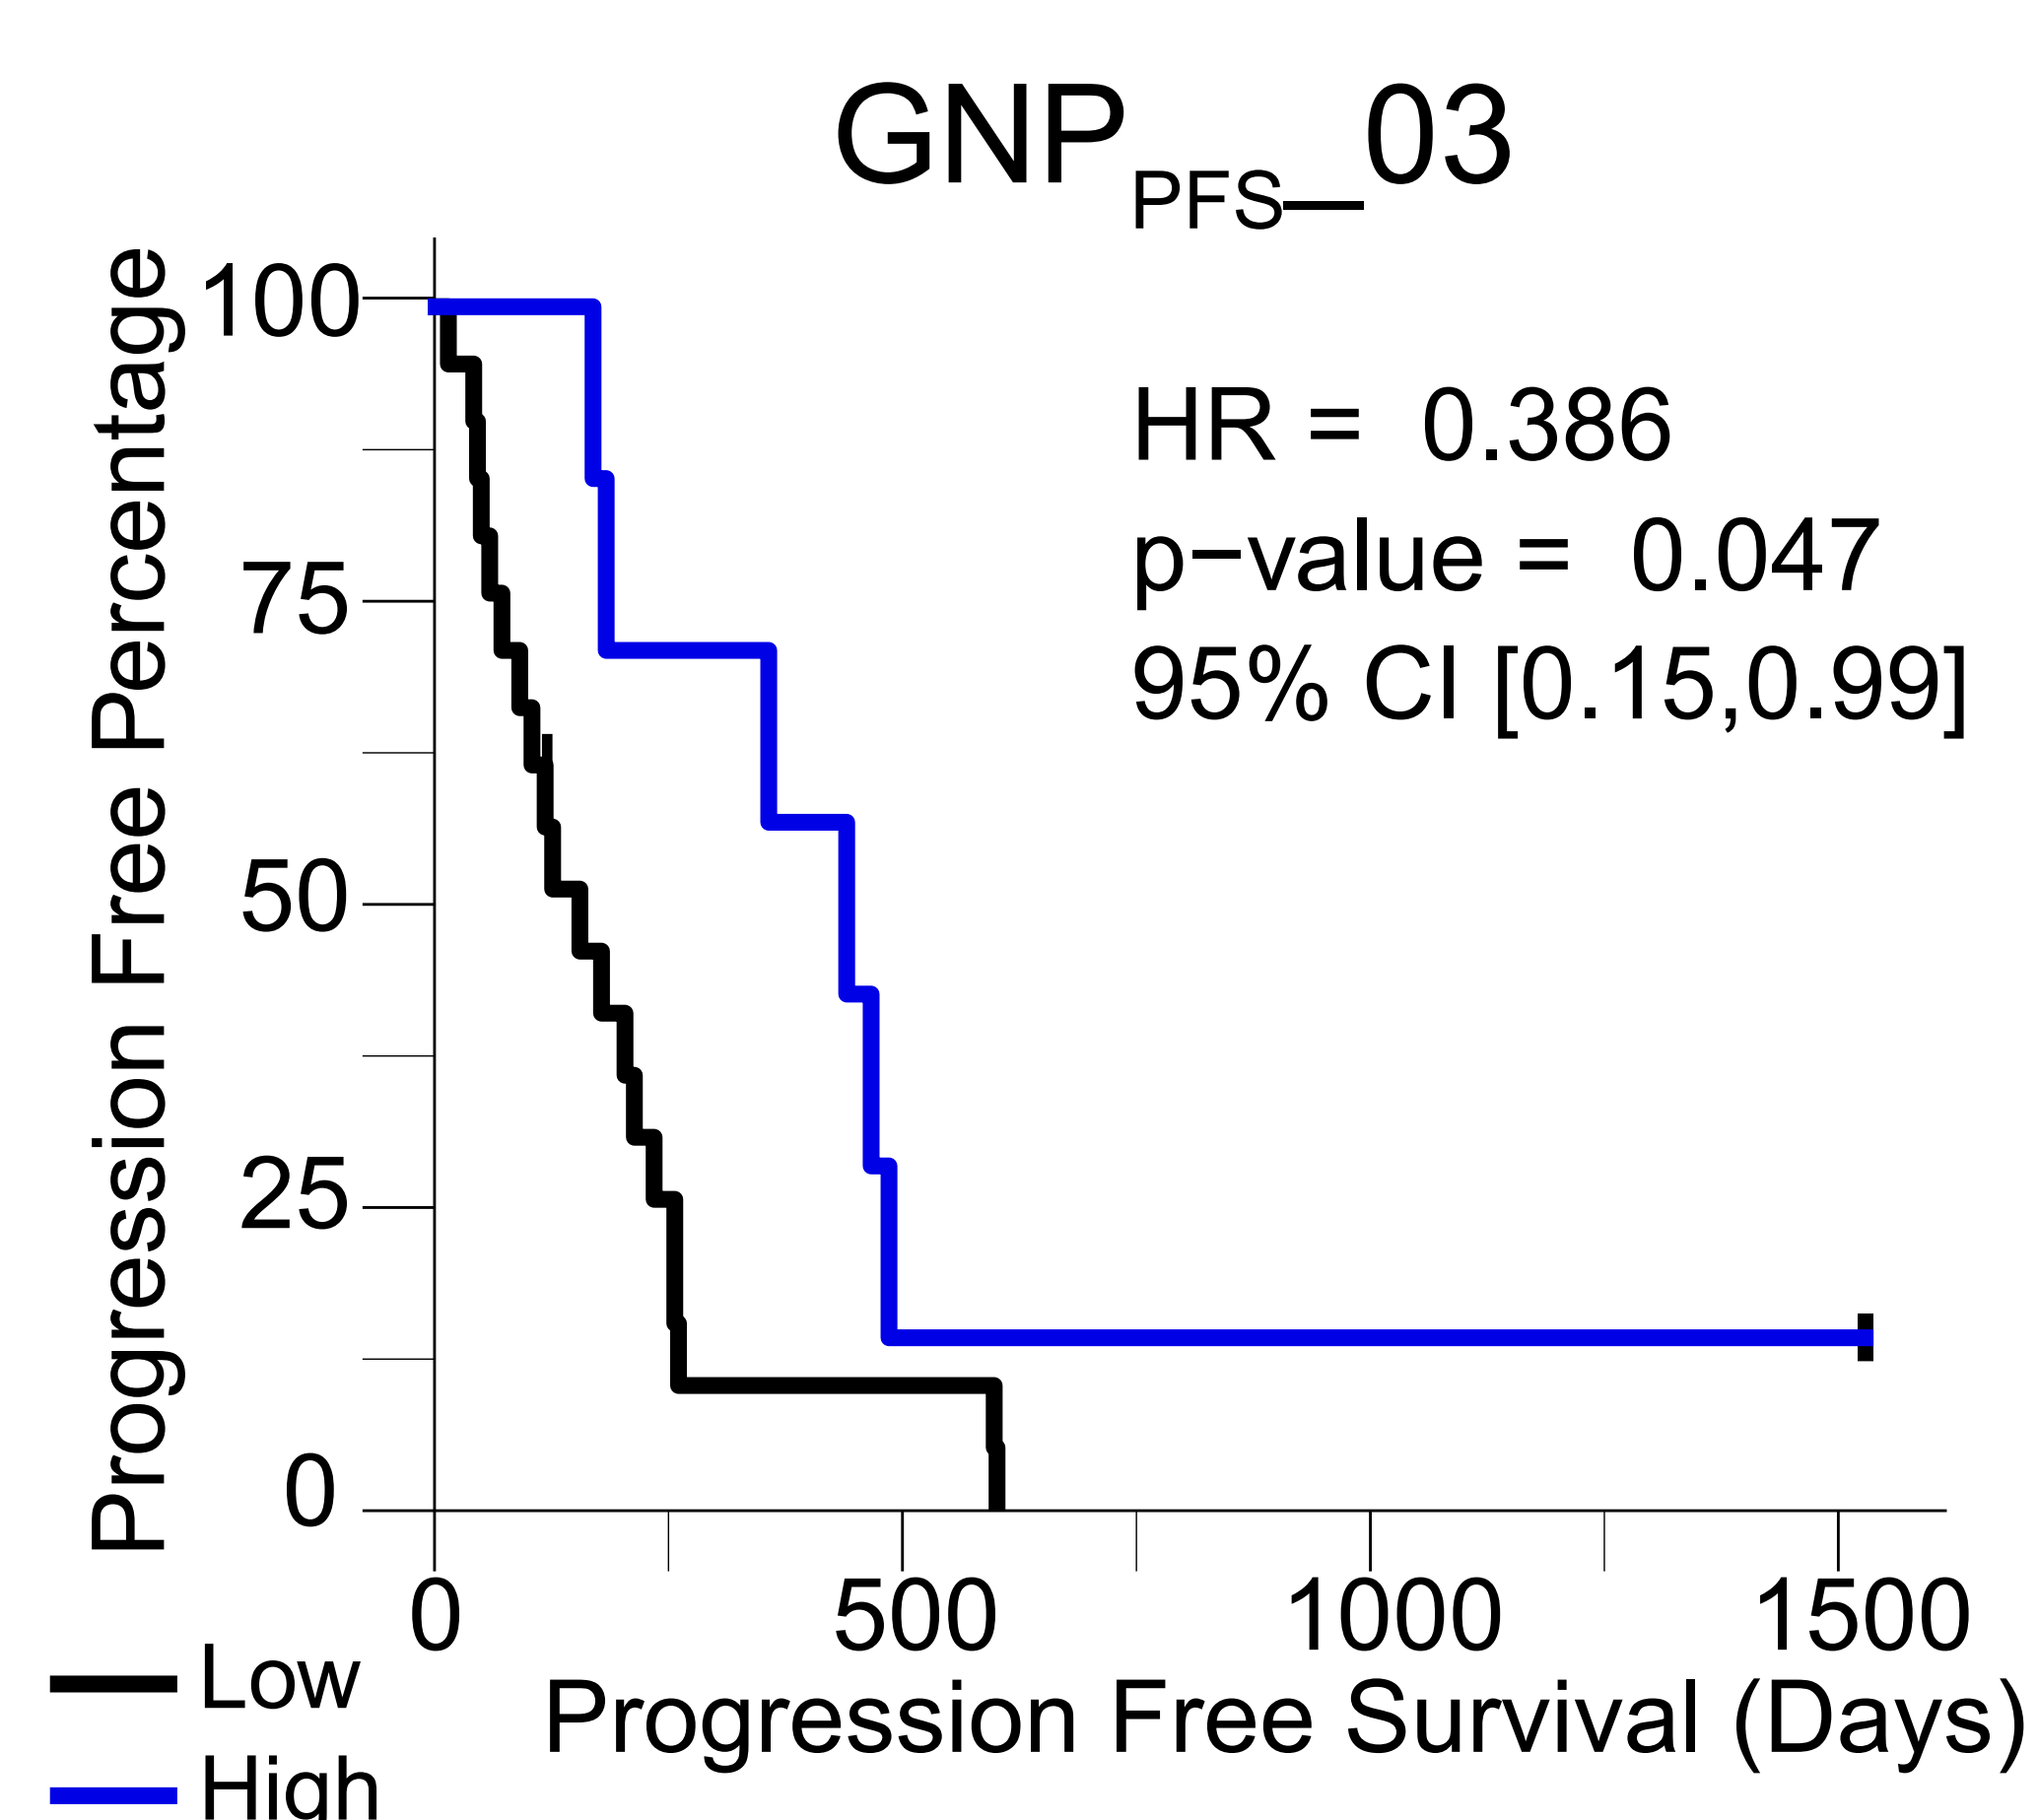**g**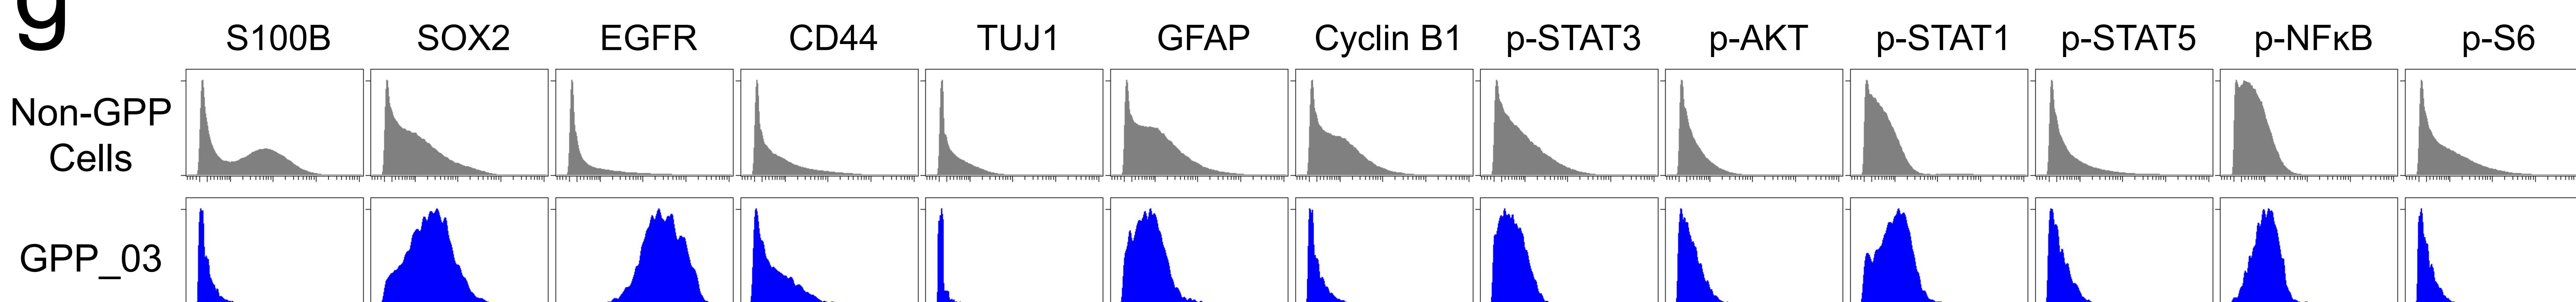**h**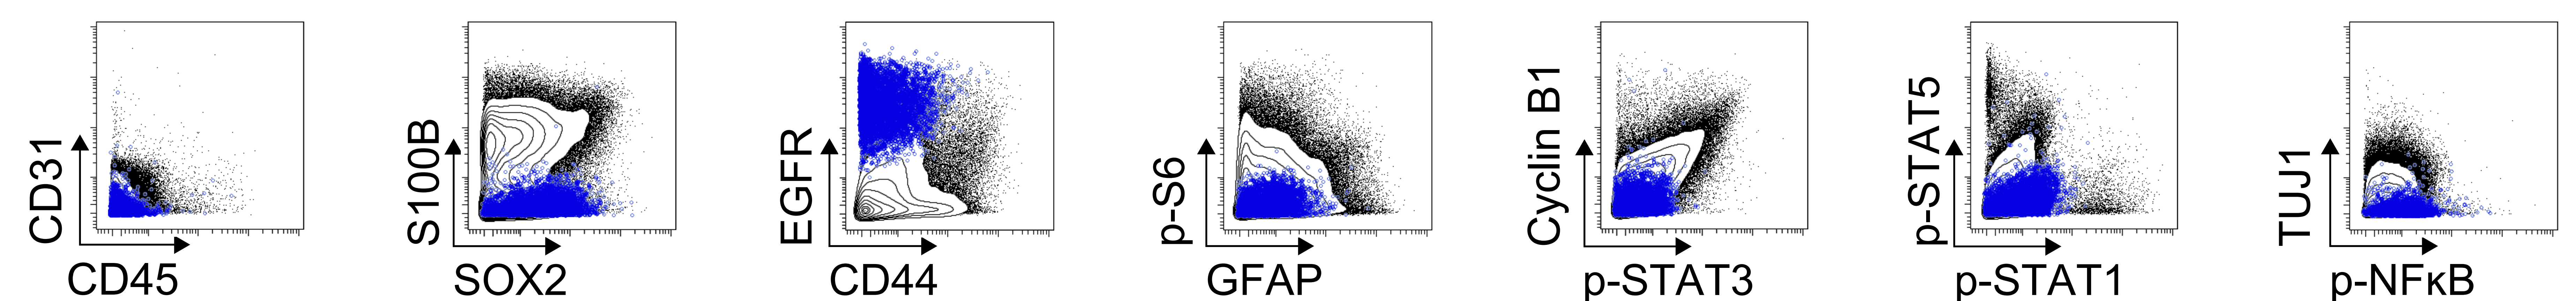

Supplement: supp [file elife-56879-supp-v1.zip]
